# Supplementary material
Source: publisher figshare collection journal article supplement (https://rs.figshare.com/ndownloader/files/28860756)
Supplement: Supplementary file 1 [file 28860756]

## Sheet: Metadata
Datafile S3. Estimated frequencies of multicellularity and sexual reproduction within phyla.
These sheets give the estimated frequencies within phyla for multicellularity and sexual reproduction, but a trait is not listed for a phylum if it is thought to be invariant in that phylum
For example, we do not give the frequency of multicellularity for Microsporidia, because all species in this group are thought to be unicellular
Kingdoms and phyla within kingdoms were listed alphabetically.
Data for most phylum includes the taxonomy (class, order, family), species richness, data on multicellularity and reproduction, and the supporting references
Data for genera or species within each phylum are only shown when it is necessary to search for data at these levels
Brackets indicate when the original reference used a different classification level to refer to a taxon
"no data" means no information could be found describing the trait in this genus
References are listed in Datafile S4.

## Sheet: Amoebozoa
Phylum	No rank	Order	Family	Genus	Species	Species richness	Unicellular/multicellular	Reference for cellular	Sexual/asexual	Reference for reproduction
Amoebozoa						803
				Acramoeba	Acramoeba dendroida	1	no data		no data
				Angulamoeba		2	no data		no data
				Arboramoeba	Arboramoeba reticulata	1	no data		no data
	Archamoebae					45	unicellular	Nydam et al. (2017)
			Entamoebidae			23
				Endolimax		2			no data
				Entamoeba		21			asexual	Maciver (2016)
			Mastigamoebidae			13			no data
				Mastigamoeba		8			no data
				Mastigella		5			no data
			Pelomyxidae	Pelomyxa		4			no data
			unclassified Archamoebae	Rhizomastix		5			no data
				Darbyshirella	Darbyshirella terrestris	1	no data		no data
				Dictyamoeba	Dictyamoeba vorax	1	no data		no data
	Flabellinia					67
		Dactylopodida				32			asexual	Wright et al. (2015)
			Paramoebidae			21
				Cunea		2	no data
				Korotnevella		11	no data
				Neoparamoeba	Neoparamoeba longipodia	1	unicellular	Sibbald et al. (2017)
				Paramoeba		7	unicellular	Sibbald et al. (2017)
				Squamamoeba	Squamamoeba japonica	1	no data
			Vexilliferidae			10
				Pseudoparamoeba		2	no data
				Vexillifera		8	no data
				Endostelium		3	no data		no data
			Pellitidae	Pellita		2	no data		no data
			Vannellidae			30	unicellular	Vaerewijck et al. (2011)
				Clydonella	Clydonella sawyeri	1			no data
				Lingulamoeba	Lingulamoeba leei	1			no data
				Paravannella	Paravannella minima	1			no data
				Platyamoeba		7			no data
				Ripella		3			no data
				Vannella		17			no data
		Himatismenida				15
			Cochliopodiidae			12
				Cochliopodium		11	no data		sexual	Tekle et al. (2014)
				Ovalopodium	Ovalopodium desertum	1	no data		no data
			Goceviidae	Gocevia	Gocevia fonbrunei	1	no data		no data
				Parvamoeba		2	no data		no data
	Longamoebia					49
		Centramoebida				33
			Acanthamoebidae			32			asexual	Saeed & Sandström (2013)
				Acanthamoeba		27	unicellular	Hargrave et al. (1999)
				Comandonia	Comandonia operculata	1	no data
				Luapeleamoeba		2	no data
				Protacanthamoeba	Protacanthamoeba bohemica	1	no data
				Vacuolamoeba	Vacuolamoeba acanthoformis	1	no data
			Balamuthiidae	Balamuthia	Balamuthia mandrillaris	1	unicellular	Adamska et al. (2014)	no data
			Dermamoebida			4
				Dermamoeba	Dermamoeba algensis	1	no data		no data
				Mayorella		2	no data		no data
				Paradermamoeba	Paradermamoeba levis	1	no data		no data
			Thecamoebida			12			sexual	Lahr et al. (2011)
				Sappinia		3
					Sappinia diploidea		unicellular	Rubeniņa et al. (2017)
					Sappinia pedata		unicellular	Adamska et al. (2014)
				Stenamoeba		6	no data
				Thecamoeba		3	unicellular	Schiller & Wuttke (2015)
			Stygamoebida			3
				Stygamoeba	Stygamoeba regulata	1	no data		no data
				Vermistella		2	no data		no data
			Gracilipodida	Flamella		7	no data		no data
				Heliamoeba	Heliamoeba mirabilis	1	no data		no data
				Ischnamoeba	Ischnamoeba montana	1	no data		no data
				Multicilia	Multicilia marina	1	unicellular	Brooks & Wallingford (2014)	no data
				Mycamoeba	Mycamoeba gemmipara	1	no data		no data
	Dictyostelids (dictyostelid cellular slime molds)					126	multicellular	Sheikh et al. (2018)	sexual	Lahr et al. (2011)
		Acytosteliales				63
			Acytosteliaceae			44
			Cavenderiaceae			19
		Dictyosteliales				62
				Coremiostelium	Coremiostelium polycephalum	1
			Dictyosteliaceae			38
			Raperosteliaceae			23
				Synstelium	Synstelium polycarpum	1	no data		no data
				Hyperamoeba	Hyperamoeba flagellata	1	unicellular	Nandy (2017)	no data
	Myxogastria (plasmodial slime molds)					344	unicellular	Fiore-Donno et al. (2011)	sexual	Lahr et al. (2011);Fiore-Donno et al. (2011)
		Liceales				36
			Cribrariaceae			7
			Dictydiaethaliaceae			2
			Enteridiidae			3
			Liceaceae			5
			Reticulariaceae			19
		Echinosteliales				8
			Clastodermataceae			2
			Echinosteliidae			6
		Physariida				172
			Didymiaceae			78
			Elaeomyxaceae			1
			Physaraceae			93
		Stemonitida				75
				Diacheopsis		2
				Macbrideola		1
			Stemonitidae			72
		Trichiida				53
			Arcyriaceae			1
			Dianemataceae			4
			Trichiidae			48
		Protosteliales				23
			Cavosteliaceae			5
				Cavostelium	Cavostelium apophysatum	1	no data		no data
				Ceratiomyxella	Ceratiomyxella tahitiensis	1	no data		no data
				Planoprotostelium		2	no data		no data
				Protosporangium	Protosporangium articulatum	1	no data		no data
			Ceratiomyxaceae	Ceratiomyxa		2	no data		sexual	Fiore-Donno et al. (2011)
			Echinosteliopsidaceae	Echinosteliopsis	Echinosteliopsis oligospora	1	no data		no data
			Protosteliaceae			15
				Clastostelium	Clastostelium recurvatum	1	no data		no data
				Nematostelium		2	no data		no data
				Protosteliopsis	Protosteliopsis fimicola	1	no data		no data
				Protostelium		3	unicellular	McGrath (2018)	no data
				Schizoplasmodiopsis		3	unicellular	Shadwick & Stephenson (2004)	no data
				Schizoplasmodium	Schizoplasmodium cavostelioides	1	unicellular	Shadwick & Stephenson (2004)	no data
				Schoutedamoeba	Schoutedamoeba minuta	1	no data		no data
				Soliformovum		2	no data		no data
				Tychosporium	Tychosporium acutostipes	1	no data		no data
				Phalansterium	Phalansterium solitarium	1	unicellular	Cavalier-Smith et al. (2004)	no data
				Stereomyxa	Stereomyxa ramosa	1	no data		no data
				Telaepolella	Telaepolella tubasferens	1	no data		no data
		Arcellinida				76	unicellular	Steele et al. (2018)	sexual	Lahr et al. (2011)
			Arcellidae			7
			Microchlamyiidae			2
			Centropyxidae			1
			Difflugiidae			13
			Heleoperidae			2
			Hyalospheniidae			40
			Lesquereusiidae			2
			Netzeliidae			4
			Cryptodifflugiidae			2
			Plagiopyxidae			2
			Trigonopyxidae			1
	Euamoebida					22
			Echinamoebidae			7
				Echinamoeba		3	no data		no data
				Filamoeba		2	no data		no data
				Ptolemeba		2	no data		no data
	Tubulinida					15	unicellular	Vaerewijck et al. (2011)
			Amoebidae			4			asexual	Sopina (1994)
			Hartmannellidae			7
				Glaeseria	Glaeseria mira	1			no data
				Hartmannella		2			no data
				Nolandella	Nolandella hibernica	1			no data
				Saccamoeba		2			no data
				Vermamoeba	Vermamoeba vermiformis	1			asexual	Scheid (2019)
			unclassified Tubulinida	Copromyxa		4			no data
		Leptomyxida				10
			Flabellulidae			8
				Flabellula		3	no data		no data
				Paraflabellula		2	no data		no data
				Rhizamoeba		3	no data		no data
			Leptomyxidae	Leptomyxa		2	no data		asexual	Valle et al. (2017)
				Pyxidicula	Pyxidicula operculata	1	no data		no data
				Unda	Unda schaefferi	1	no data		no data

## Sheet: Charophyta
Phylum	Class	Order	Family	Genus	Species	Species richness	Unicellular/multicellular	Reference for cellular	Sexual/asexual character	Reference for reproduction
Charophyta						4867
	Charophyceae					678	multicellular	Boudouresque (2015)
		Charales				676			sexual	Turmel et al. (2007)
			Aclistocharaceae			1
			Atopocharaceae			1
			Characeae			631
			Clavatoraceae			2
			Feistiellaceae			19
			Porocharaceae			22
		Charophyceae ordo incertae sedis	Charophyceae familia incertae sedis			2
				Gemmichara	Gemmichara sinensis	1			no data
				Trochiliscus	Trochiliscus sexcostatus	1			no data
	Chlorokybophyceae	Chlorokybales	Chlorokybaceae	Chlorokybus	Chlorokybus atmophyticus	1	unicellular	Boudouresque (2015)	unknown	Haig (2010)
	Coleochaetophyceae					37	multicellular	Boudouresque (2015)
		Chaetosphaeridiales	Chaetosphaeridiaceae			9
				Chaetosphaeridium		7			sexual	Graham et al. (1991)
				Dicoleon		1			no data
				Polychaetophora		1			no data
		Coleochaetales	Coleochaetaceae			28			sexual	Wodniok et al. (2011)
	Zygnemophyceae (Conjugatophyceae)					4107			sexual	Gontcharov et al. (2004)
		Desmidiales				2906
			Closteriaceae			211	unicellular	Denboh et al. (2001)
			Desmidiaceae			2640
				Actinodontum		3
				Actinotaenium		57
				Allorgeia		2
				Amscottia		2
				Arthrodesmus		20
				Bambusina		6
				Bourellyodesmus		6
				Brachytheca		2
				Calocylindrus		3
				Cosmaridium		1
				Cosmarium		1011	unicellular	Codd et al. (2015)
				Cosmocladium		7
				Croasdalea		1
				Cruciangulum		1
				Desmidium		19
				Docidium		39
				Euastridium		4
				Euastrum		296	unicellular	Nolte (1989)
				Groenbladia		4
				Gymnozyga		1
				Haplotaenium		3
				Heimansia		2
				Hyalotheca		11
				Ichthyocercus		6
				Ichthyodontum		1
				Mateola		2
				Micrasterias		80
				Octacanthium		7
				Onychonema		2
				Oocardium		2
				Pachyphorium		5
				Phymatodocis		3
				Pleurotaeniopsis		4
				Pleurotaenium		84	unicellular	Haroon & Pittman (1997)
				Prescottiella		1
				Sphaerozosma		19
				Spinocosmarium		2
				Spondylosium		28
				Staurastrum		662	unicellular	Turmel et al. (2007)
				Staurodesmus		82
				Streptonema		2
				Teilingia		7
				Tetmemorus		8
				Trapezodesmus		1
				Triplastrum		3
				Triploceras		6
				Ursinella		3
				Vincularia		1
				Xanthidium		118	unicellular	Schmidt & Dicher(2007)
			Gonatozygaceae			14
				Genicularia		2	no data
				Gonatozygon		11	unicellular	Kataoka (2015)
				Leptocystinema		1	no data
			Peniaceae	Penium		41
					Penium margaritaceum		unicellular	Domozych et al. (2011)
		Zygnematales (Conjugales)				1201			sexual	Timme et al. (2012)
			Mesotaeniaceae			92	unicellular	Hall et al. (2008)
			Zygnemataceae			1109	multicellular	Zhong et al. (2015)
	Klebsormidiophyceae	Klebsormidiales				41	multicellular	Boudouresque (2015)	unknown	Mori et al. (2015)
			Elakatotrichaceae			16
				Closteriospira		1			no data
				Elakatothrix		15			no data
			Klebsormidiaceae			25
				Entransia		2			no data
				Hormidiella		3
					Hormidiella parvula				asexual	Subrahmanyan (1976)
				Klebsormidium		17			no data
				Streptofilum		1			no data
				Streptosarcina		2			no data
	Mesostigmatophyceae	Mesostigmatales	Mesostigmataceae	Mesostigma	Mesostigma viride	1	unicellular	Boudouresque (2015)	sexual	Mori et al. (2015)

## Sheet: Chlorophyta
Phylum	Class	Order	Family	Genus	Species	Species richness	Unicellular/multicellular	Reference for cellular	Sexual/asexual	Reference for reproduction
Chlorophyta						6847
	Mamiellophyceae					22	unicellular	Tragin & Vaulot (2019)
		Dolichomastigales				6
			Crustomastigaceae	Crustomastix		2			no data
			Dolichomastigaceae	Dolichomastix		4			no data
		Mamiellales				10
			Bathycoccaceae			3
				Bathycoccus		1			no data
				Ostreococcus		2			no data
			Mamiellaceae			7
				Mamiella		1			no data
				Mantoniella		2			no data
				Micromonas		4			no data
		Monomastigales	Monomastigaceae	Monomastix		6			asexual	Leliaert et al. (2011)
	Chlorodendrophyceae	Chlorodendrales				45	unicellular	Ulvskov et al. (2013)
			Chlorodendraceae			44
				Prasinocladus		3			no data
				Scherffelia		8			no data
				Tetraselmis		33
					Tetraselmis indica				asexual	Arora et al. (2013)
			Halosphaeraceae	Pachysphaera		1			no data
	Chlorophyceae					3689
		Chaetopeltidales				19
			Chaetopeltidaceae			13
				Bulbococcus		1	no data		no data
				Chaetopeltis		2	no data		no data
					Chaetopeltis orbicularis
				Floydiella		1	no data		no data
				Hormotilopsis		2	no data
					Hormotilopsis gelatinosa				sexual	Kirjakov & Velichkova (2017)
				Koshicola		1	no data		no data
				Planophila		3	unicellular	Škaloud et al. (2018)	no data
				Pseudulvella		3	no data		asexual	Sanchez-Puerta et al. (2006)
			Dicranochaetaceae	Dicranochaete		6	unicellular	Francke & Blokland (1985)	asexual	Caisová (2016)
		Chaetophorales				219
			Aphanochaetaceae			14
				Aphanochaete		7	multicellular	Wujek & Thompson (2005)	no data
				Chaetonema		3	no data		no data
				Micropoa		1	no data		no data
				Thamniochaete		3	no data		no data
			Barrancaceae	Barranca		1	no data		unknown	Caisová et al. (2015)
			Chaetophoraceae			186
				Arthrochaete		1
				Caespitella		1
				Cedercreutziella		1
				Chaetomnion		1
				Chaetonemopsis		1
				Chaetophora		9	multicellular	Caisová et al. (2011)	no data
				Chloroclonium		2
				Chlorotylium		2
				Choreoclonium		1
				Crenacantha		1
				Diaphragma		1
				Didymosporangium		1
				Draparnaldia		15	no data		no data
				Draparnaldioides		9	no data		no data
				Draparnaldiopsis		8	no data		sexual	Simons & Beem (1987)
				Elaterodiscus		1
				Endoclonium		3	no data		no data
				Endophyton		2
				Entodictyon		1
				Epibolium		3	no data
					Epilobium hirsutum				sexual	Lee et al.(2017)
				Fritschiella		1
				Gloeoplax		1
				Gongrosira		28	no data		asexual	Phadnis & Iyer (2016)
				Gongrosirella		1
				Herposteiron		2
				Hormotila		3
				Ireksokonia		1
				Iwanoffia		1
				Jaagiella		1
				Klebahniella		1
				Kymatotrichon		1
				Leptosiropsis		1
				Lochmiopsis		2
				Myxonemopsis		1
				Myxothrix		1
				Nayalia		1
				Periplegmatium		1
				Pilinella		1
				Pleurangium		1
				Pleurococcus		6	unicellular	Wright (1975)	no data
				Pseudochaete		1
				Skvortzoviothrix		1
				Sporocladopsis		3	no data		no data
				Stereococcus		1
				Stigeoclonium		49	multicellular	Wujek & Thompson (2005)	2 sexual species and 47 asexual species	Michetti & Leonardi (2010)
					Stigeoclonium helveticum				sexual	Michetti & Leonardi (2010)
					Stigeoclonium tenue				sexual	Michetti & Leonardi (2010)
				Streptochlora		1
				Thamniochloris		3
				Thamniolum		1
				Trichodiscus		1
				Tumulofilum		1
				Uvulifera		2
				Zoddaea		1
				Zygomitus		1
			Schizomeridaceae	Schizomeris		3	multicellular	Davis (1904)
					Schizomeris leibleinii				asexual	Prasad & Srivastava (1963)
			Uronemataceae	Uronema		15	no data		unknown	Caisová et al. (2015)
		Chlamydomonadales				1767
			Actinochloridaceae			16
				Actinochloris		1	unicellular	Ocampo-Paus & Friedmann (1966)	no data
				Deasonia		7	no data		no data
				Macrochloris		6	unicellular	Pérez-Martínez et al. (2010)	unknown	Uzunov et al. (2010)
				Pseudodictyochloris		2	no data		asexual	Uzunov et al. (2010)
			Asteromonadaceae			10
				Asteromonas		2			no data
					Asteromonas gracilis		unicellular	Ben-Amotz & Grunwald (1981)
				Aulacomonas		2	no data		no data
				Collodictyon		3	unicellular	Klaveness (1995)	no data
				Pseudostephanoptera		1	no data		no data
				Tetraptera		1	no data		no data
				Triptera		1	no data		no data
			Carteriaceae	Pseudagloë		5	no data		no data
			Characiochloridaceae			23
				Characiochloris		13	unicellular	Nozaki (1993)	no data
				Chlamydopodium		8	no data		no data
				Metapolytoma		1	no data		no data
				Physocytium		1	no data		no data
			Characiosiphonaceae			2
				Characiosiphon		1	no data		sexual	Stewart et al. (1978)
				Lobocharacium	Lobocharacium coloradoense	1	unicellular	Buchheim et al. (2002)	no data
			Chlamydomonadaceae			971
				Agloë		1
				Brachiomonas		2
				Carteria		63	unicellular	Bell (1978)	asexual but 2 sexual species	Nozaki (1994)
					Carteria eugametos				sexual	Nozaki (1994)
					Carteria obtusa				sexual	Nozaki (1994)
				Chlainomonas		3
				Chlamydomonas		592	unicellular	Bell (1978)
					Chlamydomonas acidophila				sexual	Watanabe & Lewis (2017)
					Chlamydomonas augustae				sexual	Watanabe (1983)
					Chlamydomonas bilatus				asexual	Watanabe & Lewis (2017)
					Chlamydomonas hedleyi				asexual	Watanabe & Lewis (2017)
					Chlamydomonas moewusii				sexual	Hoffmann et al. (2007)
					Chlamydomonas monticola				unknown	Watanabe (1983)
					Chlamydomonas mutabilis				unknown	Watanabe (1983)
					Chlamydomonas noctigama				sexual	Watanabe & Lewis (2017)
					Chlamydomonas parkeae				asexual	Watanabe & Lewis (2017)
					Chlamydomonas pitschmannii				sexual	Watanabe & Lewis (2017)
					Chlamydomonas pseudogloeogama				asexual	Watanabe & Lewis (2017)
					Chlamydomonas raudensis				asexual	Watanabe & Lewis (2017)
					Chlamydomonas reinhardtii				sexual	Miyamura & Nagumo (2016)
					Chlamydomonas sordida				asexual	Watanabe & Lewis (2017)
					Chlamydomonas umbonata				unknown	Watanabe (1983)
				Chlamydonephris		6
				Chlorobrachis		2
				Chloroceras		1
				Chloromonas		109	unicellular	Buchheim et al. (1997)
					Chloromonas brevispina				sexual	Řezanka et al. (2008)
					Chloromonas chenangoensis				sexual	Hoham et al. (2009)
					Chloromonas hohamii				sexual	Remias et al. (2013)
					Chloromonas miwae				sexual	Muramoto et al. (2010)
					Chloromonas reticulata				sexual	Pröschold et al. (2001)
					Chloromonas serbinowii				sexual	Pröschold et al. (2001)
					Chloromonas tughillensis				sexual	Hoham et al. (2009)
				Chlorotriangulum		1
				Corbierea		2
				Costachloris		1
				Cylindromonas		1
				Dangeardinia		3
				Diplostauron		7
				Furcilla		5
				Gigantochloris		1
				Gloeomonas		9
				Heterochlamydomonas		3
				Hirtusochloris		1
				Hyalobrachion		2
				Ixipapillifera		3
				Lobochlamys		2
				Lobomonas		23	unicellular	Descy et al. (2011); Bell (1978)
					Lobomonas denticulata				unknown	Belcher et al. (1965)
				Microglena		17			no data
				Oltmannsiella		1
				Oogamochlamys		3
				Parapolytoma		1
				Peterfiella		1
				Phyllariochloris		5
				Polytoma		19	unicellular	Eichenberger (1982)	sexual	Bell (1978)
				Protococcus		1
				Provasoliella		11
				Pseudocarteria		7
				Pseudofurcilla		1
				Pyramichlamys		11			no data
				Rhysamphichloris		3
				Selenochloris		4
				Smithsonimonas		1
				Sphaerella		2
				Sphaerellopsis		16			no data
				Sphenochloris		3
				Spirogonium		1
				Tetrablepharis		3
				Tetratoma		1
				Tussetia		2
				Vitreochlamys		14			no data
			Chlamydomonadales incertae sedis			54
				Chloropteridella		1
				Chlororhabdion		1
				Coleochlamys		4	no data		no data
				Cryodactylon		3	no data		no data
				Desmatractum		8	no data		no data
				Diplochloris		5	no data		no data
				Echinosphaerella		1
				Ettlia		7			no data
					Ettlia oleoabundans		unicellular	Ferroni et al. (2018)
				Graesiella		2	no data		no data
				Halochlorella		1
				Hapalochloris		1
				Hydrianum		12	no data		no data
				Lobosphaeropsis		2	no data		no data
				Muriellopsis		3	unicellular	Campo et al. (2001)	no data
				Pseudochlorothecium		2	no data		no data
				Tetraflagellochloris		1
			Chlorangiellaceae			41
				Cecidochloris		2	no data		no data
				Chlamydomonadopsis		5	no data		no data
				Chlorangiella		9	no data		no data
				Chlorangiochloris		1	no data		no data
				Chlorangiopsis		11	no data		no data
				Chlorangium		3	no data		no data
				Chlorophysema		3	no data		no data
				Malleochloris		1	no data		no data
				Pseudochlorangium		2	no data		no data
				Stylosphaeridiella		1
				Stylosphaeridium		2	no data		no data
				Tetracladus		1
			Chlorochytriaceae			11
				Botryokoryne		1	no data		no data
				Burkillia		1	no data		no data
				Chlorochytrium		4			sexual	Wujek & Thompson (2005)
					Chlorochytrium cohnii		unicellular	Hamsher & Saunders (2014)
				Endosphaera		1	no data		no data
				Phyllobium		3	no data		no data
				Rhodochytrium		1	no data		no data
			Chlorococcaceae			141
				Apodochloris		4	no data		no data
				Athroocystis		1
				Axilococcus		1
				Borodinellopsis		2	no data
					Borodinellopsis texensis				asexual	Watanabe & Lewis (2017)
				Capsochloris		1
				Chloracervus		1
				Chlorococcum		44	unicellular	Hasan et al. (2016)
					Chlorococcum costatozygotum				sexual	Watanabe & Lewis (2017)
					Chlorococcum echinozytotum				sexual	Watanabe & Lewis (2017)
					Chlorococcum elkhartiense				asexual	Watanabe & Lewis (2017)
					Chlorococcum hypnosporum				sexual	Watanabe & Lewis (2017)
					Chlorococcum infusionum				asexual	Watanabe & Lewis (2017)
					Chlorococcum nivale				unknown	Archibald (1979)
					Chlorococcum submarinum				sexual	Blackwell et al. (1991)
				Chlorohippotes		1
				Chlorolunula		1
				Closteridium		5	no data		no data
				Cystococcus		1
				Cystomonas		3	no data		no data
				Emergococcus		1
				Emergosphaera		1
				Fasciculochloris		2	no data		no data
				Ferricystis		1
				Halochloris		1
				Kentrosphaeropsis		1
				Lautosphaeria		1
				Nautococcus		12	no data		no data
				Neglectellopsis		1
				Neohalochloris		1
				Neospongiococcum		11	unicellular	Deason & Floyd (1989)
					Neospongiococcum excentricum				unknown	Deason & Cox (1971)
					Neospongiococcum macropyrenoidosum				unknown	Deason & Cox (1971)
					Neospongiococcum mobile				unknown	Deason & Cox (1971)
					Neospongiococcum vacuolatum				unknown	Deason & Cox (1971)
				Octogoniella		1
				Oophila		1
				Phaseolaria		1
				Pseudodictyococcus		2
				Pseudoplanophila		1
				Pseudospongiococcum		1
				Pseudotrochiscia		1
				Radiosphaera		2
				Skujaster		1
				Spongiochloris		9	unicellular	Mclean & Trainor (1965)	unknown	McLean & Trainor (1965)
				Spongiococcum		2
				Telmatoskene		1
				Tetracystis		18	unicellular	Deason & Floyd (1989)	asexual	Song & Lee (2014)
				Ulotrichella		1
				Valkanoviella		1
			Chlorosarcinaceae			45
				Borodinella		1	no data		no data
				Chlorosarcina		7	unicellular	Dubovik et al. (2016)	no data
				Chlorosarcinopsis		12	unicellular	Dubovik et al. (2016)
					Chlorosarcinopsis caeca				unknown	Watanabe (1983)
					Chlorosarcinopsis variabilis				unknown	Trainor & Hilton (1966)
				Chlorosphaera		2	no data		no data
				Chlorosphaeropsis		3	no data
					Chlorosphaeropsis alveolata				unknown	Herndon (1958)
				Desmotetra		4	no data
					Desmotetra aureospora				sexual	Ling (2001)
					Desmotetra antarctica				sexual	Ling (2001)
				Entophysa		1
				Neochlorosarcina		8	unicellular	Belnap & Büdel (2016)	no data
				Polysphaera		1	no data		no data
				Possonia		1	no data		no data
				Pseudotetracystis		3	no data		no data
				Sarcinochlamys		1
				Symbiococcum		1
			Dunaliellaceae			64
				Apiochloris		1			no data
				Chloronephris		1			no data
				Dunaliella		25	unicellular	Akbarzadeh & Shariati (2014)
					Dunaliella lateralis				unknown	Watanabe (1983)
					Dunaliella minuta				sexual	Borowitzka & Siva (2007)
					Dunaliella parva				sexual	Borowitzka & Siva (2007)
					Dunaliella peircei				sexual	Borowitzka & Siva (2007)
					Dunaliella polymorpha				unknown	Borowitzka & Siva (2007)
					Dunaliella primolecta				unknown	Borowitzka & Siva (2007)
					Dunaliella pseudosalina				sexual	Borowitzka & Siva (2007)
					Dunaliella quartolecta				unknown	Borowitzka & Siva (2007)
					Dunaliella salina				sexual	Borowitzka & Siva (2007)
					Dunaliella tertiolecta				unknown	Borowitzka & Siva (2007)
					Dunaliella viridis				sexual	Borowitzka & Siva (2007)
				Hafniomonas		9	unicellular	Descy et al. (2011)	asexual	Ettl & Moestrup (1980)
				Hyaliella		1			no data
				Hyalocardium		1			no data
				Medusochloris		1			no data
				Papenfussiomonas		1
				Phyllocardium		1
				Platella		1
				Polytomella		9	unicellular	MacDonald & Lee (2015)	sexual	de la Cruz & Gittleson (1981)
				Quadrichloris		8	unicellular	Hargraves & Steele (1980)	no data
				Silvamonas		1
				Spermatozopsis		3	unicellular	Descy et al. (2011)	no data
				Ulochloris		1
			Goniaceae			14
				Astrephomene		2	multicellular	Herron et al. (2009)	sexual	Nozaki (1996)
				Gonium		12	multicellular	Herron et al. (2009)	sexual	Knowlton (1974)
					Gonium multicoccum				sexual	Nozaki (1996)
					Gonium pectorale				sexual	Nozaki (1996)
					Gonium viridistellatum				sexual	Nozaki (1996)
			Haematococcaceae			42
				Balticola		4	unicellular	Munakata et al. (2016)	no data
				Chlorogonium		23	unicellular	Bell (1978)	sexual	Nozaki et al. (1998)
				Gungnir		3	no data		no data
				Haematococcus		5	unicellular	Buchheim et al. (2013)
					Haematococcus buetschli				sexual	Bai et al. (2016)
					Haematococcus capensis				sexual	Bai et al. (2016)
					Haematococcus droebakensis				sexual	Bai et al. (2016)
				Hyalogonium		5	unicellular	Nakada et al. (2008)	no data
				Rusalka		1			no data
				Stephanosphaera	Stephanosphaera pluvialis	1	multicellular	Bell (1978)	sexual	Knowlton (1974)
			Hormotilaceae			4
				Dendrocystis		1	no data		no data
				Heleococcus		2	no data		no data
				Palmodactylon		1	no data		no data
			Hypnomonadaceae			3
				Hypnomonas		1	no data		no data
				Kremastochloris		1	no data		no data
				Nautococcopsis		1	no data		no data
			Palmellaceae			20
				Chlamydocystis		1	no data		no data
				Chloranomala		2	no data		no data
				Dendrodictyon		1	no data		no data
				Ecballocystella		1	no data		no data
				Ecballodictyon		1	no data		no data
				Gloiodictyon		2	no data		no data
				Gyorffyana		1	no data		no data
				Györffyana		1	no data		no data
				Inoderma		2	no data		no data
				Oncosaccus		1
				Palmella		5	no data		no data
				Palmellosphaericum		1
				Urococcus		1
			Palmellopsidaceae			51
				Apiococcus		1
				Asterococcus		6	no data		no data
				Chlamydocapsa		7	no data		no data
				Gloeococcus		12	no data
					Gloeococcus minutissimus				unknown	King (1973)
					Gloeococcus pyriformis				sexual	Iyengar & Ramanathan (1974)
				Gloeodendron		1	no data
				Nautocapsa		1	no data		asexual	Nichols et al. (1991)
				Palmellopsis		4			no data
					Palmellopsis gelatinosa		unicellular	Pérez-Martínez et al. (2010)
				Ploeotila		1			no data
				Pseudosphaerocystis		4	no data		no data
				Pseudotetraspora		3	no data		no data
				Schizodictyon		1
				Sphaerellocystis		8	unicellular	Nichols et al. (1991)
					Sphaerellocystis aplanospora				unknown	Nichols et al. (1991)
				Tetrasporidium		2	no data
					Tetrasporidium javanicum				sexual	Sarma & Suryanarayana (1969)
			Phacotaceae			84	unicellular	Bell (1978)
				Arnoldiamonas		1			no data
				Cephalomonas		1			no data
				Chlamydoblepharis		2			no data
				Coccomonas		4			no data
				Delphinomonas		1
				Dysmorphococcus		12
					Dysmorphococcus africana				sexual	Dawson & Harris (1979)
					Dysmorphococcus sarmaii				sexual	Shyam (1981)
				Fortiella		4			no data
				Fortiellopsis		1
				Granulochloris		1
				Hemitoma		1
				Iyengariomonas		1
				Melomonas		1
				Pedinopera		3			no data
				Pedinoperopsis		1
				Phacotus		13
					Phacotus lendneri				asexual	Giering et al. (1990)
				Pteromonas		26			no data
				Pyramidococcus		1
				Thoracomonas		8			no data
				Tingitanella		1
				Wislouchiella		1
			Pleurastraceae	Pleurastrum		4	no data		asexual	Phadnis & Iyer (2016)
			Protosiphonaceae			4
				Protosiphon		2			no data
					Protosiphon botryoides		unicellular	Denton & O’Kelley (1970)
				Urnella		2	no data
					Urnella terrestris				asexual	Watanabe (1981)
			Raciborskiellaceae	Raciborskiella		2	unicellular	Koufopanou (1994)	sexual	Bell (1978)
			Sphaerocystidaceae			14
				Dictyochlorella		3	no data		no data
				Heleochloris		2	no data		no data
				Korschpalmella		2	unicellular	Hargraves & Steele (1980)	no data
				Planctococcus		2	no data		no data
				Planochloris		1	no data		no data
				Sphaerocystis		3	unicellular	Espinoza-Barrera et al. (2014)	no data
				Topaczevskiella		1	no data		no data
			Sphaerodictyaceae			4
				Dictyastrum		1	no data		no data
				Pectodictyon		2	no data		no data
				Sphaerodictyon		1	no data		no data
			Spondylomoraceae			14
				Chlorcorona		1	no data		no data
				Pascherina		1	no data		no data
				Pyrobotrys		9	unicellular	Nozaki & Kuroiwa (1991)
					Pyrobotrys stellata				sexual	Nozaki (1986)
				Spondylomorum		2	no data		no data
				Uva		1	no data		no data
			Tetrabaenaceae			2			sexual	Herron et al. (2010)
				Basichlamys		1	multicellular	Herron et al. (2009)
				Tetrabaena		1	multicellular	Herron et al. (2009)
			Tetrasporaceae			50
				Apiocystis		4	no data		no data
				Askenasyella		6	no data		no data
				Chaetochloris		3	no data		no data
				Chlorangiochaete		1	no data		no data
				Chlorokremys	Chlorokremys scutella	1
				Fottiella		2	no data		no data
				Gemellicystis		1
				Octosporiella		1
				Paulschulzia		4			no data
					Paulschulzia pseudovolvox		multicellular	Hasan et al. (2015)
				Phacomyxa		2	no data		no data
				Placosphaera		2			asexual	Showalter (1952)
					Placosphaeroap acai		unicellular	Showalter (1952)
				Polychaetochloris		1
				Porochloris		3	no data		no data
				Schulziella		1
				Tetraspora		18			asexual but 2 sexual species	Sherwood (2016)
					Tetraspora cylindrica		unicellular	Ghazala et al. (2004)
					Tetraspora gelatinosa		unicellular	Ghazala et al. (2004)
					Tetraspora lubrica		unicellular	Lembi & Walne (1971)
			Volvocaceae			72			sexual	Nozaki (1996)
				Colemanosphaera		2
				Conradimonas		1
				Eudorina		7	multicellular	Kaiser et al. (2009)
				Gymnomonas		1
				Hamakko		1
				Hemiflagellochloris		1
				Lundiella		1
				Mastigosphaera		1
				Pandorina		6	multicellular	Kaiser et al. (2009)
				Platydorina		1
				Platymonas		4	unicellular	Pearson & Norris (1974)
				Pleodorina		7	multicellular	Kaiser et al. (2009)
				Stephanoon		3
				Tabris		1
				Volvox		30	multicellular	Kaiser et al. (2009)
				Volvulina		4
				Yamagishiella		1
		Chlorophyceae incertae sedis				43
			Chlorangiopsidaceae			2
				Chlorangiogloea		1	no data		no data
				Swarchewskiella		1	no data		no data
			Chlorophyceae familia incertae sedis			37
				Alvikia		1	no data		no data
				Bicuspidella		2	no data		no data
				Botryosphaera		1	no data		no data
				Capsulococcus		1
				Chlorovitta		1
				Crassikamaena		1
				Cribrokamaena		2	no data		no data
				Eubrownia		4	no data		no data
				Glenobotrydion		2	unicellular	Oehler (1976)	no data
				Globophycus		2	no data		no data
				Hexamitus		1
				Hortobagyiella		2	no data		no data
				Hyalococcus		1
				Hydrurites		1
				Jenufa		4	no data		unknown	Němcová et al. (2011)
				Jolyella		1
				Lobocystis		6	no data		asexual	Izaguirre (1991)
				Noremia		1
				Parachlorococcum		1
				Seletonella		1
				Sphaerobotrys		1
			Dangeardinellaceae	Dangeardinella		1	unicellular	Koufopanou (1994)	no data
			Tetracystaceae			3
				Axilosphaera		1	no data		no data
				Heterotetracystis		2	no data
					Heterotetracystis akinetos				unknown	Cox & Deason (1968)
					Heterotetracystis intermedia				unknown	Cox & Deason (1968)
		Oedogoniales	Oedogoniaceae			730
				Bulbochaete		137	multicellular	Botts & Cowell (1991)	sexual	Sherwood (2016)
					Bulbochaete hiloensis				sexual	Cook (1962)
				Oedocladium		17	no data		sexual	Sherwood (2016)
				Oedogonium		575	multicellular	Fussell (1982)	sexual	Maier & Müller (1986)
				Pseudoprostratum		1	no data		no data
		Sphaeropleales				911
			Ankistrodesmaceae	Rhaphidium		1	unicellular	Gaffron (1944)	no data
			Bracteacoccaceae	Bracteacoccus		16	unicellular	Büdel et al. (2016)	unknown	Fuíková et al. (2011, 2013)
			Bracteamorphaceae	Bracteamorpha	Bracteamorpha trainorii	1	no data		sexual	Fučíková et al. (2014)
			Characiaceae			83
				Acrochasma		2	no data		no data
				Actidesmium		1	no data		no data
				Ankyra		6	unicellular	Reymond & Hegewald (1988)	sexual	Fučíková et al. (2014)
				Bicuspidellopsis		2	no data		no data
				Characiella		1	no data
				Characiellopsis		1			unknown	Iyengar (1975)
				Characium		51	unicellular	Steinman et al. (1987)	no data
				Craniocystis		1
				Deuterocharacium		1
				Korshikoviella		5	unicellular	Pham et al. (2014)
					Korshikoviella gracilipes				asexual	Pérez-Martínez et al. (2001)
				Lambertia		3	no data		no data
				Lanceola		1
				Marthea		1
				Pseudoschroederia		3	no data		no data
				Sykidion		4	no data		no data
			Chromochloridaceae	Chromochloris	Chromochloris zofingiensis	1	no data		asexual	Fučíková et al. (2014)
			Cylindrocapsaceae			10
				Cylindrocapsa		8	multicellular	Albay & Akçaalan (2008)	sexual	Hoffmana & Hofmann (1975)
				Cylindrocapsopsis		1	unicellular	Hoffmana & Hofmann (1975)	no data
				Fusola		1	no data		no data
			Dictyochloridaceae	Dictyochloris		2	unicellular	Shoup & Lewis (2003)
					Dictyochloris fragrans				asexual	Fučíková et al. (2014)
			Dictyococcaceae	Dictyococcus		3	unicellular	Dubovik et al. (2016)	unknown	Fučíková et al. (2014)
			Hydrodictyaceae			115
				Euastropsis		1
				Helierella		1
				Hydrodictyon		5	multicellular	Rindi (2014)	sexual	Buchheim et al. (2005)
				Lacunastrum		1
				Monactinus		2	no data		no data
				Parapediastrum	Parapediastrum biradiatum	1	no data		sexual	Fučíková et al. (2014)
				Pediastrum		31	multicellular	Ten Haven et al. (1987); Rindi (2014)	sexual	Pickett-Heaps (1972)
				Pseudopediastrum		4	no data		no data
				Sorastrum		9	no data		asexual	Buchheim et al. (2005)
				Sphaerastrum		4	no data		no data
				Stauridium		2	no data		no data
				Tetraedroides		1
				Tetraedron		48	unicellular	Buchheim et al. (2005)	asexual	Pickett-Heaps (1972)
				Tetrapedia		5	no data		no data
			Microsporaceae	Microspora		26	unicellular	Canning & Hazard (1982)	no data
			Mychonastaceae	Mychonastes		21	unicellular	Vishnivetskaya et al. (2003)	unknown	Fučíková et al. (2014)
			Neochloridaceae			26
				Botryosphaerella	Botryosphaerella sudetica	1	no data		sexual	Fučíková et al. (2014)
				Chlorotetraëdron		3	no data		no data
				Echinosphaeridium		3	no data		no data
				Golenkinia		10	unicellular	Choi et al. (2015)	sexual	Ellis & Machlis (1968)
				Neochloris		8	unicellular	Zhang et al. (2016a)
					Neochloris aquatica				sexual	Fučíková et al. (2014)
				Poloidion		1	no data		no data
			Pseudomuriellaceae	Pseudomuriella		4	no data		unknown	Fučíková et al. (2014)
			Radiococcaceae			78
				Catenococcus		1
				Coenobotrys		1
				Coenochloris		11	unicellular	Reynolds (2007)	no data
				Coenococcus		5	no data		no data
				Coenocystis		10	unicellular	Wu & Kow (2010)	no data
				Coenodispora		1
				Crucigloea		1
				Eutetramorus		2	unicellular	Wu & Kow (2010)	no data
				Garhundacystis		1
				Gloeocystis		10	no data		no data
				Hindakochloris		2
				Korshikoviobispora		1
				Neocystis		7	no data		unknown	Elias et al. (2013)
				Palmellosphaerium		1
				Palmococcus		2
				Palmodictyon		5	no data		no data
				Radiococcus		6	no data		unknown	Fučíková et al. (2014)
				Schizochloris		1
				Sphaerochloris		1
				Sphaerococcomyxa		1
				Sphaeroneocystis		1
				Sporotetras		3	no data		no data
				Thorakochloris		3	no data		no data
				Tomaculum		1	no data
			Rotundellaceae	Rotundella	Rotundella rotunda	1	no data		unknown	Fučíková et al. (2014)
			Scenedesmaceae			364
				Acutodesmus		16			no data
					Acutodesmus obliquus		unicellular	Piotrowska-Niczyporuk et al. (2015)
				Astrocladium		1
				Chodatodesmus		1
				Closteriococcus		1
				Coelastreae		2
				Coelastrella		11			no data
				Coelastropsis		1
				Coelastrum		31			asexual	Mercurio et al. (2016)
					Coelastrum microporum		unicellular	Gates & Lynch (1968)
					Coelastrum proboscideum		multicellular	Wrede et al. (2014)
					Coelastrum sphaericum		multicellular	Zhang et al. (2016b)
				Comasiella		1
				Crucigeniopsis		1
				Danubia		1
				Desmodesmus		64	unicellular	Matusiak-Mikulin et al. (2006)	asexual	Lürling (2003)
				Dimorphococcus		3
				Enallax		2
				Flechtneria		1
				Gilbertsmithia		1
				Gloeoactinium		1
				Hariotina		2
				Hofmania		1
				Hylodesmus		1
				Komarekia		2
				Lauterborniella		1
				Neodesmus		2
				Pectinodesmus		4			no data
				Protodesmus		1
				Pseudodidymocystis		4
				Pseudotetrastrum		1
				Scenedesmus		145	multicellular	Eliáš et al. (2010)	asexual but one sexual species	Ghasemi et al. (2011)
				Schistochilium		1
				Schmidledesmus		1
				Schroederiella		2
				Scotiellopsis		1
				Soropediastrum		2
				Staurogenia		1
				Steinedesmus		2
				Tetradesmus		10			no data
				Tetrallantos		2
				Tetranephris		2
				Tetrastrum		15			no data
					Tetrastrum hastiferum		multicellular	Zhang et al. (2016b)
					Tetrastrum staurogeniaeforme		multicellular	Zhang et al. (2016b)
				Truncatulus		7			no data
				Verrucodesmus		2
				Westella		2
				Westellopsis		1
				Willea		9			no data
				Yadavaea		1
			Schizochlamydaceae			4
				Planktosphaeria	Planktosphaeria gelatinosa	1	unicellular	Naselli-Flores & Barone (2000)	asexual	Starr (1954); Fučíková et al. (2014)
				Schizochlamys		3	no data
					Schizochlamys gelatinosa				sexual	Fučíková et al. (2014)
			Schroederiaceae	Schroederia		7	unicellular	Pham et al. (2014)	no data
			Selenastraceae			117
				Ankistrodesmus		25	unicellular	Eisele & Ullrich (1975)	asexual	Sukkrom et al. (2016)
				Chlorolobion		5			no data
				Curvastrum		1
				Drepanochloris		2
				Gregiochloris		2
				Kirchneriella		14
					Kirchneriella cornuta		unicellular	Swarnalatha et al. (2015)
					Kirchneriella lunaris		unicellular	Dahoumane et al. (2014)	asexual	Pickett-Heaps (1970)
				Messastrum		1
				Monoraphidium		31	unicellular	Yee (2015)	asexual	Bittencourt-Oliveira & Monteiro (2002)
				Planktococcomyxa		1
				Podohedriella		3			no data
				Pseudokirchneriella		3			no data
				Pseudoquadrigula		4			no data
				Quadrigula		6			no data
				Raphidocelis		14			no data
					Raphidocelis subcapitata		unicellular	Horvatić et al. (2007)
				Selenastrum		5	unicellular	Fairchild et al. (1997)	asexual	Benjamin & Klaine (1995)
			Sphaeropleaceae			21
				Atractomorpha		2	unicellular	Cáceres et al. (1997)	sexual	Cáceres et al. (1997)
				Characiopodium		5	no data		no data
				Parallela		3	no data		no data
				Radiofilum		3	no data		no data
				Sphaeroplea		8	no data		sexual	Buchheim et al. (1990)
			Sphaeropleales incertae sedis	Polyedriopsis		1	no data		no data
			Treubariaceae	Treubaria		8	unicellular	Jasser (1995)	no data
			Tumidellaceae	Tumidella	Tumidella tumida	1	no data		sexual	Fučíková et al. (2014)
	Chlorophyta incertae sedis	Chlorophyta incertae sedis	Chlorophyta incertae sedis			14
				Asphaltinella		2	no data		no data
				Chloremys		2	no data		no data
				Chlorolepus		1	no data		no data
				Colonella		1	no data		no data
				Ovillaria		1	no data		no data
				Paramastix		2	unicellular	Loeblich (1967)	no data
				Pseudostichococcus		1	no data		no data
				Smithsoniella		1	no data		no data
				Sphaerosiphon		1	no data		no data
				Uvella		2	no data		no data
	Chloropicophyceae	Chloropicales	Chloropicaceae			8			unknown	Santos et al. (2017)
				Chloroparvula		2	no data		no data
				Chloropicon		6	no data		no data
	Mamiellophyceae					22
		Dolichomastigales				6
			Crustomastigaceae	Crustomastix		2	no data		unknown	Leliaert et al. (2011)
			Dolichomastigaceae	Dolichomastix		4	no data		unknown	Leliaert et al. (2011)
		Mamiellales				10
			Bathycoccaceae			3
				Bathycoccus		1	no data		no data
				Ostreococcus		2	unicellular	Bellec et al. (2010)	sexual	Leliaert et al. (2011)
			Mamiellaceae			7
				Mamiella		1	unicellular	Hori et al. (1991)	no data
				Mantoniella		2	no data		no data
				Micromonas		4	unicellular	Bakeeva et al. (1978)	sexual	Leliaert et al. (2011)
		Monomastigales	Monomastigaceae	Monomastix		6	unicellular	Minnick & Raghavan (2011)	asexual	Leliaert et al. (2011)
	Nephrophyceae	Nephroselmidales	Nephroselmidaceae			34
				Anticomonas		1	no data		no data
				Argillamonas		1	no data		no data
				Bipedinomonas		2	no data		no data
				Fluitomonas		6	no data		no data
				Hiemalomonas		1			no data
				Myochloris		2	no data		no data
				Nephroselmis		14			sexual	Leliaert et al. (2011)
					Nephroselmis olivacea		unicellular	De Nova et al. (2005)
				Prototractomonas		2	no data		no data
				Pseudopedinomonas		1	no data		no data
				Sennia		3	no data		no data
				Sinamonas		1	no data
	Palmophyllophycese					9
		Palmophyllales	Palmophyllaceae			6			no data
				Palmoclathrus		1	no data		no data
				Palmophyllum		2	no data		no data
				Verdigellas		3	no data		no data
		Prasinococcales	Prasinococcaceae			3			asexual	Leliaert et al. (2016)
				Prasinococcus		1	unicellular	Tebiani et al. (2015)
				Prasinoderma		2	unicellular	Hasegawa et al. (1996)
	Pedinophyceae					25	unicellular	Marin (2012)
		Marsupiomonadales				2
			Marsupiomonadaceae	Marsupiomonas		1			no data
			Resultomonadaceae	Resultomonas		1			no data
		Pedinomonadales	Pedinomonadaceae			16
				Anisomonas		1			no data
				Chlorochytridion		1			no data
				Dioriticamonas		1			no data
				Pedinomonas		13			no data
		Scourfieldiales	Scourfieldiaceae	Scourfieldia		7			no data
	Picocystophyceae	Picocystales	Picocystaceae	Picocystis		1	unicellular	Schagerl et al. (2015)	unknown	Leliaert et al. (2011)
	Pyramimonadophyceae					113
		Pseudoscourfieldiales	Pycnococcaceae			4
				Crassosphaera		1	unicellular	Boulter (1994)	no data
				Pseudoscourfieldia		1	no data		no data
				Pycnococcus		2
					Pycnococcus provasolii		unicellular	Iriarte (1999)	asexual	Sieburth et al. (1999)
		Pyramimonadales				97
			Polyblepharidaceae			12
				Amphoraemonas		1	no data		no data
				Chloraster		1	no data		no data
				Gyromitus		2	no data		no data
				Korschikoffia		2	unicellular	Hargraves & Steele (1980)	no data
				Polyblepharides		2	no data		no data
				Printziella		1	no data		no data
				Stephanoptera		2	unicellular	Blinks et al. (1938)	no data
				Sycamina		1	no data		no data
			Pterospermataceae			20
				Polyasterias		1	no data		no data
				Pterosperma		19	no data		unknown	Moestrup et al. (2003)
			Pyramimonadaceae			65
				Angulomonas		2	no data		no data
				Coccopterum		1	no data		no data
				Cymbomonas		3	unicellular	Marshall (2013)	sexual	Moestrup et al. (2003)
				Halosphaera		4	unicellular	Amadea et al. (2017)	unknown	Moestrup et al. (2003)
				Kuzminia		1	no data		no data
				Pocillomonas		1	no data		no data
				Prasinochloris	Prasinochloris sessili	1	no data		asexual	Belcher (1966)
				Protoaceromonas		2	no data		no data
				Protochroomonas		1
				Pyramimonas		45	unicellular	Hori et al. (1995)
					Pyramimonas amylifera				asexual	Suda et al. (2004)
					Pyramimonas australis				asexual	Suda et al. (2004)
					Pyramimonas gelidicola				asexual	Suda et al. (2004)
					Pyramimonas grossii				asexual	Suda et al. (2004)
					Pyramimonas pseudoparkeae				asexual	Daugbjerg et al. (2000)
					Pyramimonas tetrarhynchus				asexual	Suda et al. (2004)
					Pyramimonas tychotreta				sexual	Daugbjerg et al. (2000)
					Pyramimonas vacuolata				unknown	Bhuiyan et al. (2015)
				Tasmanites		3	unicellular	Greenwood et al. (2000)	no data
				Trichloridella		1
		Pyramimonadophyceae ordo incertae sedis				12
			Pterosphaeridiaceae	Dictyotidium		7	no data		no data
			Pyramimonadophyceae familia incertae sedis			5
				Saharifusa		4	no data		no data
				Sgrossoella		1	no data		no data
	Trebouxiophyceae					890			asexual but 31 sexual species	Adl et al.(2012); Fučíková et al. (2015)
		Chlorellales				516
			Chlorellaceae			225
				Acanthosphaera		1
				Actinastrum		11	no data
				Apatococcus		5
				Apodococcus		2
				Auxenochlorella		3
				Carolibrandtia		1
				Catena		2
				Chlorella		42	unicellular	Ulvskov et al. (2013)
				Chloroparva		1
				Closteriopsis		4
				Compactochlorella		2
				Coronastrum		4
				Cylindrocelis		1
				Dicellula		1
				Dicloster		1
				Dictyosphaerium		11
					Dictyosphaerium chlorelloides		unicellular	Costas et al. (2001)
					Dictyosphaerium ehrenbergianum		unicellular	Nayana et al. (2018)
				Didymogenes		5
				Fissuricella		1
				Follicularia		6	no data
				Geminella		14	no data
				Gloeotila		20	no data
				Golenkiniopsis		4
				Hegewaldia		1
				Helicosporidium		1
				Heynigia		2
				Hindakia		2
				Hormospora		1
				Kalenjinia		1
				Keratococcus		7	unicellular	Vilar et al. (2015)
				Leptochlorella		1
				Marasphaerium		1
				Marinichlorella		1
				Marvania		2
				Masaia		1
				Meyerella		1
				Micractinium		14	no data
				Mucidosphaerium		4
				Muriella		5
				Nannochloris		2
				Nanochlorum		1
				Palmellochaete		1
				Parachlorella		2
				Planktochlorella		1
				Podohedra		4
				Prototheca		13	unicellular	Rapuntean et al. (2009)
				Pseudochloris		1
				Pseudosiderocelopsis		1
				Pumiliosphaera		1
				Siderocelis		10	no data
				Zoochlorella		1
			Chlorellales incertae sedis			4
				Ankistrodesmopsis		1	no data
				Picochlorum		3	unicellular	Hazeem et al. (2017)
			Eremosphaeraceae			9
				Excentrosphaera		1	no data
				Neglectella		8	no data
			Oocystaceae			278
				Amphikrikos		5
				Catenocystis		2
				Cerasterias		2
				Chodatella		5
				Chodatellopsis		1
				Chondrosphaera		1
				Coenolamellus		1
				Conradia		1
				Crucigeniella		2
				Cryocystis		3
				Dactylococcus		2
				Didymocystis		1
				Ecballocystis		10	no data
				Ecballocystopsis		4
				Ecdysichlamys		3
				Echinocoleum		3
				Elongatocystis		1
				Eremosphaera		6	unicellular	Marten et al. (2010)
				Ettliella		1
				Fotterella		1
				Franceia		12	no data
				Glochiococcus		1
				Gloeocystopsis		1
				Gloeotaenium		2
				Gloxidium		1
				Granulocystis		5
				Granulocystopsis		6
				Hemichloris		1
				Hyalochlorella		1
				Jaagichlorella		1
				Juranyiella		1
				Keriochlamys		1
				Kirchneriellosaccus		1
				Lagerheimia		20	unicellular	Kharchenko et al. (2008)
				Makinoella		1
				Makinoelloideae		1
				Micracantha		1
				Mycacanthococcus		3
				Mycotetraedron		1
				Nephrochlamys		6	unicellular	Schabetsberger et al. (2009)
				Nephrocytium		8	no data
				Oocystaenium		1
				Oocystella		7	no data
				Oocystidium		2
				Oocystis		55	unicellular	Mueller (1976)
				Oocystopsis		1
				Oonephris		2
				Ooplanctella		1
				Pachycladella		4
				Palmellococcus		2
				Pilidiocystis		2
				Planctonema		2
				Planctonemopsis		1
				Planktosphaerella		1
				Pseudobohlina		1
				Pseudochlorococcum		2
				Pseudococcomyxa		5
				Quadricoccus		5
				Rayssiella		2
				Reinschiella		1
				Rhombocystis		3
				Saturnella		3
				Schizochlamydella		3
				Scotiella		8	no data
				Selenoderma		2
				Sestosoma		1
				Siderocystopsis		3
				Tetrachlorella		5
				Thelesphaera		1
				Trigonidiella		1
				Trochiscia		21	unicellular	Kustatscher et al. (2014)
		Microthamniales	Microthamniaceae	Microthamnion		5	multicellular	Herron et al. (2013)
		Phyllosiphonales	Phyllosiphonaceae			12
				Mysteriochloris		1	no data
				Phyllosiphon		8
					Phyllosiphon coccidium		unicellular	Procházková et al. (2015)
				Phytophysa		2	no data
				Polulichloris		1	no data
		Prasiolales				142
			Koliellaceae			38
				Ekerewekia		1	no data
				Koliella		20	unicellular	Stein & Amundsen (1967)
				Pseudochlorella		3	unicellular	Ismaiel & Said (2018)
				Raphidonema		12	multicellular	Komárek & Nedbalová (2007)
				Raphidonemopsis		2	no data
			Prasiolaceae			97
				Desmococcus		5	no data
				Diplosphaera		4
					Diplosphaera chodatii		unicellular	Orekhova et al.(2019)
				Hormidium		6	multicellular	Wuhrmann & Eichenberger (1975)
				Prasiococcus		1
				Prasiola		35
					Prasiola linearis		multicellular	Mostaert et al. (2006)
				Prasiolopsis		1
				Prasionella		1
				Prasionema		1
				Rosenvingiella		6	multicellular	Heesch et al.(2012)
				Rosenvingiellopsis		1
				Schizogonium		9	no data
				Stichococcus		27	unicellular	Yamamoto et al. (2016)
			Prasiolales incertae sedis	Elliptochloris		7	unicellular	Gustavs et al. (2017)
		Trebouxiales				101
			Botryococcaceae			21
				Botryococcus		15	unicellular	Bachofen (1982)
				Caulodendron		1	no data
				Dichotomococcus		3	no data
				Selenodictyon		2	no data
			Trebouxiaceae			80
				Asterochloris		16	unicellular	Armaleo & May (2009)
				Dictyochloropsis		2	no data
				Heterochlorella		1	unicellular	Kim et al. (2017)
				Lobosphaera		3
					Lobosphaera incisa		unicellular	Nakano et al. (1994)
				Myrmecia		9	unicellular	Marx & Peveling (1983)
				Parietochloris		4	no data
				Symbiochloris		9	no data
				Trebouxia		30	unicellular	Marx & Peveling (1983)
				Trochisciopsis		2	no data
				Vulcanochloris		3	no data
				Watanabea		1
		Trebouxiophyceae ordo incertae sedis				114
			Coccomyxaceae			52
				Choricystis		8	unicellular	Fawley et al.(2004)
				Coccomyxa		30	unicellular	Huang et al. (2011)
				Dactylothece		2	no data
				Diogenes		1	no data
				Dispora		4	no data
				Lusitania		1	no data
				Nannokloster		2	no data
				Palmogloea	Palmogloea protuberans	1	unicellular	Shields et al. (1957)
				Paradoxia		3	no data
			Dictyosphaeriaceae			3
				Dactylosphaerium		2	no data
				Dimorphococcopsis		1	no data
			Micractiniaceae	Phythelios		3	no data
			Trebouxiophyceae incertae sedis			56
				Autumnella		2	no data
				Chloroidium		4
					Chloroidium ellipsoideum		unicellular	Mazalová et al. (2011)
				Chloropyrula		1
				Crucigenia		15	multicellular	Zhang et al. (2016b)
				Desertella		2	no data
				Edaphochlorella		1
				Eremochloris		1
				Glaphyrella		1
				Heveochlorella		2	unicellular	Sanders et al.(2016)
				Kalinella		2	no data
				Koliellopsis		1
				Lemmermannia		5	no data
				Leptosira		8	no data
				Makinoella		1
				Parachloroidium		2	no data
				Pseudomarvania		2
				Rhopalosolen		3	unicellular	Tuno et al. (2006)
				Viridiella		1
				Xerochlorella		1
				Xylochloris		1
	Ulvophyceae					1975
		Bryopsidales				582
			Bryopsidaceae			78
				Bryopsidella		2	no data		sexual	Calderón‐Sáenz &Schnetter (1989)
				Bryopsis		55	unicellular	Beardall et al.(2009)
					Bryopsis maxima				sexual	Kuroiwa et al. (2001)
					Bryopsis plumosa				sexual	Togashi et al. (2012)
				Jaffrezocodium		1	no data		no data
				Lambia		1	no data		no data
				Pseudobryopsis		7	no data
					Pseudobryopsis myura				sexual	Feldmann (1969)
				Pseudoderbesia		1	no data		no data
				Trichosolen		11	no data		no data
			Caulerpaceae	Caulerpa		99	unicellular	Cavs & Pohnert (2010)	sexual	Togashi et al. (2006)
			Chaetosiphonaceae	Chaetosiphon		1	no data		no data
			Codiaceae			165
				Abacella		1	no data		no data
				Appeninocodium		1	no data		no data
				Arabicodium		2	no data		no data
				Botryella		1	no data		no data
				Boueina		2	no data		no data
				Codium		143	unicellular	Williams & Smith (2007)	unknown	Bulleri & Airoldi (2005);Gagnon et al. (2015)
				Garwoodia		2	no data		no data
				Geppella		2	no data		no data
				Hedstroemia		1	no data
				Johnsonicodium		1			no data
				Neoanchicodium		1
				Scotlandella		1
				Succodium		6	no data		no data
				Tethysicodium		1
			Derbesiaceae			26
				Derbesia		20	no data		sexual	Togashi et al. (2006)
				Halicystis		1	unicellular	Graves & Gutknecht (1976)	sexual	Kobara & Chihara (1984)
				Pedobesia		5	no data		no data
			Dichotomosiphonaceae			35
				Avrainvillea		30	no data		no data
				Cladocephalus		3	no data		no data
				Dichotomosiphon		2	no data		sexual	Moestrup Ø & Hoffman (1975)
			Halimedaceae	Halimeda		46	unicellular	Price et al. (2011)	sexual	Togashi et al. (2006)
			Ostreobiaceae	Ostreobium		3	no data		no data
			Pseudocodiaceae	Pseudocodium		6	no data		no data
			Pseudoudoteaceae			4
				Hydraea		1	no data		no data
				Pseudoudotea		3	no data		no data
			Rhipiliaceae			31
				Rhipilia		12	no data		no data
				Rhipiliopsis		19	no data		no data
			Udoteaceae			88
				Boodleopsis		9	multicellular	Coppejans et al. (1992)	no data
				Botryodesmis		1	no data		no data
				Callipsygma		1	no data		no data
				Chlorodesmis		11	no data		no data
				Chloroplegma		1
				Coralliodendron		1
				Flabellaria		1
				Flabellaria		1
				Flabellia		1
				Penicillus		10	no data		sexual	Togashi et al. (2006)
				Poropsis		1
				Pseudochlorodesmis		4	no data		no data
				Pseudopenicillus		1
				Rhipidosiphon		3	no data		no data
				Rhipiliella		1
				Rhipocephalus		2	no data		sexual	Togashi et al. (2006)
				Siphonogramen		2	no data		no data
				Tydemania		1
				Udotea		36	no data		sexual	Togashi et al. (2006)
		Chlorocystidales	Chlorocystidaceae	Desmochloris		2	no data		no data
		Cladophorales				481	multicellular	Butterfield (2009)
			Anadyomenaceae			30
				Anadyomene		15
					Anacdyomene wrightii				sexual	Enomoto & Hirose (1970)
				Microdictyon		15			no data
			Boodleaceae			36
				Boodlea		5			no data
				Cladophoropsis		12
					Cladophoropsis membranacea				asexual	van der Strate et al. (2002)
				Nereodictyon		1			no data
				Phyllodictyon		10			no data
				Struvea		5			no data
				Struveopsis		3			no data
			Cladophoraceae			328
				Bryobesia		1			no data
				Chaetomorpha		69
					Chaetomorpha exilissima				sexual	Parodi & Cáceres (1996)
					Chaetomorpha valida				sexual	Deng et al. (2012)
				Cladophora		196			sexual	Sherwood (2016)
				Lurbica		1			no data
				Lychaete		19			no data
				Pseudorhizoclonium		2			no data
				Rama		1			no data
				Rhizoclonium		36			unknown	Sherwood (2016)
				Spongiochrysis		1			unknown	Rindi et al. (2006)
				Willeella		2			no data
			Okellyaceae	Okellya	Okellya curvata	1			asexual	Wetherbee & Verbruggen (2016)
			Pithophoraceae			39
				Aegagropila		9			unknown	Sherwood (2016)
				Aegagropilopsis		3			no data
				Arnoldiella		7			unknown	Sherwood (2016)
				Basicladia		3
					Basicladia chelonum				sexual	Hamilton (1948)
				Chaetocladiella		1			no data
				Chaetonella		1			no data
				Cladogonium		1			no data
				Cladostroma		1			no data
				Dermatophyton		1
				Gemmiphora		1
				Pithophora		2			unknown	Sherwood (2016)
				Wittrockiella		9			asexual but 2 sexual species	Boedeker et al. (2017)
					Wittrockiella amphibia				sexual	Boedeker et al. (2017)
					Wittrockiella zosterae				sexual	Boedeker et al. (2017)
			Pseudocladophoraceae	Pseudocladophora		2			no data
			Siphonocladaceae			28
				Apjohnia		2			no data
				Boergesenia		3			no data
				Chamaedoris		3			no data
				Dictyosphaeria		11			no data
				Ernodesmis		1			no data
				Siphonocladus		8			no data
			Valoniaceae			17
				Petrosiphon		1			no data
				Physidrum		4			no data
				Valonia		10			no data
				Valoniopsis		2			no data
		Dasycladales				204			sexual	Nizamuddin (1964)
			Dasycladaceae			176	unicellular	Li-Weber et al. (1989)
			Polyphysaceae			28
				Acetabularia		12	unicellular	Hartwig et al. (1985)
				Chalmasia		1	no data
				Clypeina		3	no data
				Clypeineae		4	no data
				Ioanella		1	no data
				Parvocaulis		6	no data
				Pseudoclypeina		1	no data
		Ignatiales	Ignatiaceae			4
				Ignatius		1	unicellular	Watanabe & Nakayama (2007)	no data
				Pseudocharacium		3	unicellular	Watanabe & Nakayama (2007)	no data
		Oltmannsiellopsidales	Oltmannsiellopsidaceae			11
				Halochlorococcum		7	no data		no data
				Neodangemannia		1	no data		no data
				Oltmannsiellopsis		3			no data
					Oltmannsiellopsis viridis		unicellular	Hamana et al. (2013)
		Scotinosphaerales	Scotinosphaeraceae	Scotinosphaera		10			asexual	Škaloud et al. (2013)
					Scotinosphaera paradoxa		unicellular	Škaloud et al. (2018)
		Trentepohliales	Trentepohliaceae			121
				Byssus		1	no data		no data
				Cephaleuros		20	no data		asexual	Ogle (1997)
				Chroolepus		2	no data		no data
				Friedaea		1	no data		no data
				Lochmium		1	no data		no data
				Phycopeltis		26	multicellular	Sanders & Ríos (2015)	sexual	Lücking (1999)
				Printzina		8	no data		no data
				Rhizothallus		1	no data		no data
				Spongioplastidium		1
				Sporocladus		1
				Stomatochroon		4	no data		no data
				Trentepohlia		55	multicellular	Donner et al. (2017)	unknown	Rindi & Guiry (2002)
		Ulotrichales				211	multicellular	Butterfield (2009)
			Binucleariaceae	Binuclearia		5			unknown	Sherwood (2016)
			Collinsiellaceae	Collinsiellopsis		1			unknown	Chihara (1967)
			Gayraliaceae	Gayralia		2			unknown	Pellizzari et al. (2008)
			Gloeotilaceae	Coccothrix	Coccothrix chlorolobata	1			asexual	Wetherbee & Verbruggen (2016)
			Gomontiaceae			14
				Chlorojackia	Chlorojackia pachyclados	1			asexual	Nielsen & Correa (1987)
				Collinsiella		3			sexual	Scagel (1960)
				Eugomontia		2			no data
				Gomontia		8
					Gomontia polyrhiza				asexual	Nielsen & Correa (1987)
			Hazeniaceae			7
				Chamaetrichon		2			no data
				Hazenia		5			no data
			Helicodictyaceae			15
				Helicodictyon		1			no data
				Protoderma		9			no data
				Rhexinema		5			no data
			Kraftionemaceae	Kraftionema	Kraftionema allantoideum	1			asexual	Wetherbee & Verbruggen (2016)
			Monostromataceae	Monostroma		32			sexual	Bast et al. (2009)
			Sarcinofilaceae			3
				Filoprotococcus		2			no data
				Sarcinofilum		1			no data
			Tupiellaceae			3
				Tupiella		2			no data
				Vischerioclonium		1			no data
			Ulotrichaceae			127
				Acrosiphonia		13			sexual	Sussmann & DeWreede (2007)
					Acrosiphonia arcta				sexual	Sussmann & Scrosati (2011)
				Capsosiphon		2
				Chlorhormidium		2
				Chlorocystis		1
				Chlorothrix		3
				Codiolum		2
				Dendronema		1
				Didymothrix		1
				Fottea		5
					Fottea pyrenoides				asexual	Wetherbee & Verbruggen (2016)
				Geminellopsis		1
				Gloeotilopsis		4
					Gloeotilopsis planctonica				asexual	Wetherbee & Verbruggen (2016)
				Gyoerffyella		1
				Hediniella		1
				Heterothrichopsis	Heterothrichopsis viridis	2
				Hormidiopsis	Hormidiopsis crenulata	1
				Hormidiospora	Hormidiospora verrucosa	1
				Hormococcus		1
				Ingenhouzella		1
				Interfilum		3
				Microsporopsis		1
				Pearsoniella	Pearsoniella variabilis	1
				Protomonostroma		2
				Psephonema		1
				Psephotaxus		1
				Pseudendocloniopsis		1
				Pseudoschizomeris		1
				Pseudothrix		2
				Spongomorpha		12			no data
				Ulothrix		44
					Ulothrix implexa				asexual	Lokhorst &Vroman (1974)
					Ulothrix tenuissima				sexual	Lokhorst &Vroman (1974)
					Ulothrix zonata				sexual	Wetherbee & Verbruggen (2016);Lokhorst &Vroman (1974)
				Ulotrichopsis		1			no data
				Urospora		14
					Urospora bangioides				sexual	Hanic (2005)
					Urospora neglecta				sexual	Hanic (2005)
					Urospora penicilliformis				sexual	Hanic (2005)
					Urospora wormskioldii				sexual	Hanic (2005)
		Ulvales				346
			Bolbocoleaceae	Bolbocoleon		2	no data
					Bolbocoleon piliferum				sexual	O’kelly et al. (2004)
			Cloniophoraceae	Cloniophora		6	no data		unknown	Sherwood (2016)
			Ctenocladaceae			6
				Ctenocladus		2	no data		asexual	Conte & Conte (1988)
				Pseudopleurococcus		3	no data		no data
				Spongioplastidium		1	no data		no data
			Kornmanniaceae			25
				Blidingia		6	no data		asexual except Blidingia minima	Garbary & Tam (1989)
					Blidingia minima				sexual	Tatewaki & Lima (1984)
				Dilabifilum		3	no data		asexual	Johnson & John (1990)
				Kornmannia		1	no data		no data
				Lithotrichon		1	no data		no data
				Neostromatella		1	no data		no data
				Pseudendoclonium		12	multicellular	Barlow & Cattolico (1981)	no data
				Tellamia		1	no data		no data
			Phaeophilaceae	Phaeophila		9	no data
					Phaeophila dendroides				unknown	Chappell et al. (1990)
			Ulvaceae			182	multicellular	Nordby (1974)
				Enteromorpha		22
					Enteromorpha prolifer				sexual	Hiraoka et al. (2003)
				Enteronia		2			no data
				Gemina		4			no data
				Letterstedtia		3			no data
				Lobata		1			no data
				Ochlochaete		2			asexual	O'Kelly (1983)
				Percursaria		1			no data
				Phycoseris		1			no data
				Pseudoneochloris		1
				Ruthnielsenia		1			no data
				Solenia		3			no data
				Ulva		131			sexual	Chen et al. (2012)
				Ulvaria		3			no data
				Umbraulva		5			no data
				Zignoa		2			no data
			Ulvales incertae sedis			5
				Halofilum		3	no data		no data
				Paulbroadya		2	no data		no data
			Ulvellaceae			111
				Acrochaete		7	multicellular	Zhu et al. (2013)	no data
				Endoderma		4	no data		no data
				Entocladia		20	multicellular	Floyd & O'Kelly (1984)	sexual	O'Kelly (1983)
				Entoderma		1	no data		no data
				Epicladia		9	no data		no data
				Pringsheimiella		2	unicellular	Blackwell et al. (2017)	sexual	O'Kelly (1983)
				Pseudopringsheimia		1	no data		no data
				Syncoryne		1	no data		no data
				Trichothyra		1	no data		no data
				Ulvella		65	no data		unknown	O'Kelly (1983)
		Ulvophyceae incertae sedis	Ulvophyceae familia incertae sedis			3
				Blastophysa		1	no data		no data
				Trichophilus		2	no data		no data

## Sheet: Euglenozoa
Phylum	Class	Order	Family	Genus	Species	Species richness	Sexual/asexual	Reference for reproduction
Euglenozoa						1483
	Diplonemea	Diplonemida				2
			Diplonemidae	Diplonema		1	no data
			Hemistasiidae	Hemistasia		1	no data
	Entosiphonea	Entosiphonida	Entosiphonidae	Entosiphon		23	no data
	Euglenophyceae					1145	asexual	Kim et al. (2015)
		Euglenales				981
			Euglenaceae			700
			Euglenamorphaceae			1
			Parastasiellaceae			3
			Peranemataceae			17
			Phacaceae			260
		Euglenophyceae incertae sedis				6
			Euglenophyceae incertae sedis			4
			Rhynchopodaceae			2
		Eutreptiales				24
			Astasiaceae			7
			Eutreptiaceae			17
		Petalomonadida				133
			Scytomonadidae			122
			Sphenomonadidae			11
		Rapazida	Rapazidae			1
	Kinetoplastea					87
		Bodonida				54
			Bodonidae			21
				Bodo		15
					Bodo saltans		asexual	Fenchel & Finlay (2006)
				Cercomonas		3	no data
				Heliobodo		1	no data
				Nerocercomoans		1	no data
				Phanerobia		1	no data
			Cryptobiidae			21
				Cephalothamium		1	no data
				Cryptobia		5	no data
				Procryptobia		3	no data
				Trypanoplasma		12	asexual	Yusof & Kumar（2012）
			Neobodonidae			5
				Actuariola		1	no data
				Azumiobodo		1	no data
				Cruzella		1	no data
				Klosteria		1	no data
				Neobodo		1	no data
			Parabodonidae	Parabodo		5	no data
			Rhynchomonadidae			2	no data
				Dimastigella		1	sexual	Breunig et al. (1993)
				Rhynchomonas		1	no data
		Prokinetoplastida	Ichthyobodonidae	Perkinsela		1	no data
		Trypanosomatida	Trypanosomatidae			32
				Blastocrithidia		3	no data
				Crithidia		1	asexual	Erler et al. (2012)
				Herpetomonas		1	no data
				Ichthyobodo		1	asexual	Martins et al. (2015)
				Leishmania		1	sexual	Akopyants et al. (2009)
				Leptomonas		13	no data
				Paratrypanosoma		1	no data
				Sergeia		1	no data
				Trypanosoma		10	no data
	Peranemea					214
		Acroglissida	Teloproctidae	Teloprocta		1	no data
		Anisonemida	Anisonemidae			73
				Anisonema		18	no data
				Dinema		1	no data
				Heteronema		54	no data
		Natomonadida				96
			Astasiidae			75
				Astasia		41	no data
				Gyropaigne		5	no data
				Menoidium		15	no data
				Parmidium		7	no data
				Rhabdomonas		7	no data
			Distigmidae	Distigma		12	no data
			Neometanemidae	Neometanema		9	no data
		Peranemida	Peranemidae			44
				Jenningsia		2	no data
				Peranema		26	no data
				Peranemopsis		4	no data
				Urceolus		12	no data
	Ploeotarea	Ploeotiida				6
			Lentomonadidae	Lentomonas		1	no data
			Ploeotiidae	Ploeotia		5	no data
	Postgaardea					3
		Bihospitida	Bihospitidae	Bihospites		1	asexual	Breglia et al. (2010)
		Postgaardida				2
			Calkinsiidae	Calkinsia		1	asexual	Yubuki et al. (2009)
			Postgaardidae	Postgaardia		1	no data
	Stavomonadea					3	no data
		Decastavida				2
			Decastavidae	Decastava		1	no data
			Keelungiidae	Keelungia		1	no data
		Heterostavida	Serpenomonadidae	Serpenomonas		1	no data

## Sheet: Fornicata
Phylum	Class	Order	Family	Genus	Species richness	Sexual/asexual	Reference for reproduction
Fornicata					32
				Carpediemonas	1	no data
				Dysnectes	1	asexual	Yubuki et al. (2007)
				Ergobibamus	1	no data
				Hicanonectes	1	no data
				Kipferlia	1	no data
			Caviomonadidae	Iotanema	1	no data
		Diplomonadida			26
			Enteromonadidae	Enteromonas	1	no data
			Hexamitidae		21
				Giardia	9	asexual	Tůmová et al. (2007)
				Octomitus	1	no data
				Hexamita	2	no data
				Spironucleus	7	asexual	Jørgensen & Sterud (2007)
				Trepomonas	2	no data
			Retortamonadidae	Chilomastix	4	no data

## Sheet: Ascomycota
Phylum	Class	Order	Family	Genus	Species	Species richness	Unicellular/multicellular	Reference for cellular	Sexual/asexual	Reference for reproduction
Ascomycota						83837
	Archaeorhizomycetes	Archaeorhizomycetales	Archaeorhizomycetaceae	Archaeorhizomyces		2	no data		no data
	Arthoniomycetes	Arthoniales				460	multicellular	Lumbsch (2000)
			Arthoniaceae			199
				Amazonomyces		2
				Arthonia		93			sexual	Pentecost (2014)
				Arthothelium		13			no data
				Coniarthonia		6			no data
				Crypthonia		3			no data
				Cryptothecia		14			no data
				Eremothecella		3			no data
				Herpothallon		37			no data
				Inoderma		2
				Reichlingia		1
				Sagenidiopsis		3			no data
				Sporostigma		1
				Stirtonia		12			no data
				Synarthothelium		2
				Tania		1
				Tylophoron		6			no data
			Chrysothricaceae	Chrysothrix		11			no data
			Melaspileaceae	Melaspilea		10			no data
			Roccellaceae			234
				Alyxoria		7			sexual	Pentecost (2014)
				Ancistrosporella		1
				Angiactis		3
				Austrographa		3
				Austroroccella		1
				Bactrospora		25			no data
				Chiodecton		5
				Cresponea		13			no data
				Dendrographa		3
				Dichosporidium		1
				Dictyographa		1
				Dirina		4
				Enterographa		19			no data
				Feigeana		1
				Fulvophyton		2
				Graphidastra		1
				Hubbsia		2
				Ingaderia		2
				Lecanactis		10			no data
				Lecanographa		12			no data
				Mazosia		17			no data
				Opegrapha		51			no data
				Paralecanographa		1
				Pentagenella		2
				Phacographa		1
				Phoebus		1
				Roccella		4
				Roccellina		3
				Roccellographa		1
				Schismatomma		9			no data
				Schizopelte		1
				Sclerophyton		3
				Sigridea		1
				Sparria		2
				Syncesia		21			no data
			Not assigned			6
				Llimonaea		3			no data
				Synarthonia		2			no data
				Tylophorella		1			no data
	Dothideomycetes					28729	multicellular	Lumbsch (2000);Weir & Blackwell (2001)
		Abrothallales	Abrothallaceae	Abrothallus		37			no data
		Acrospermales				49
			Acrospermaceae			48
				Acrospermum		24
					Acrospermum adeanum				sexual	Davey & Currah (2006)
				Gonatophragmium		17			asexual	Hyde et al. (2013)
				Oomyces		7			sexual	Hyde et al. (2013)
			Not assigned	Paramycoleptodiscus		1			no data
		Asterinales				1605
			Asterinaceae			1417
				Acarella		3
				Allothyrium		1
				Anariste		1
				Aphanopeltis		7
				Asterina		719			sexual	Hyde et al. (2013); Hongsanan et al. (2014b)
				Asterinotheca		1
				Asterodothis		1
				Asterolibertia		35			no data
				Asterostomella		88			asexual	Hyde et al. (2013)
				Asterostromina		1
				Aulographella		4
				Aulographina		2
				Balansina		1
				Batistinula		1
				Bheemamyces		4
				Bramhamyces		1
				Calothyriolum		3
				Cirsosia		15
				Cirsosiella		1
				Dimerosporium		20
				Discopycnothyrium		1
				Doguetia		1
				Dothiclypeolum		1
				Dothidasteromella		11
				Echidnodella		34			sexual	Hongsanan et al. (2014b)
				Echidnodes		29
				Englera		6
				Englerulaster		1
				Eupelte		5
				Halbania		3
				Heraldoa		3
				Hysterostoma		7
				Ishwaromyces		1
				Isipinga		1
				Lembopodia		1
				Lembosia		148			sexual	Hongsanan et al. (2014b)
				Lembosidium		1
				Lembosiellina		1
				Lembosina		27
				Lembosiodothis		1
				Lembosiopeltis		2
				Lembosiopsis		3
				Leveillella		1
				Macowaniella		2
				Mahanteshomyces		2
				Maheshwaramyces		2
				Meliolaster		2
				Micrographa		1
				Micrographomyces		1
				Morenoella		26
				Morenoina		26
				Morqueria		1
				Neostomella		4
				Oothecium		3
				Parasterina		15
				Parasterinopsis		3
				Petrakina		2
				Pirozynskia		1
				Placoasterella		4
				Placoasterina		1
				Placosoma		2
				Prillieuxina		62			sexual	Hyde et al. (2013)
				Shivomyces		2
				Steyaertia		1
				Symphaster		3
				Thallochaete		1
				Thyrinula		1
				Thyriopsis		3
				Trichamelia		1
				Trichasterina		11
				Trichosia		1
				Triposporium		23
				Uleothyrium		2
				Viegasia		5
				Vishnumyces		1
				Wardina		2
				Yamamotoa		2
			Aulographaceae			19			sexual	Hyde et al. (2013)
			Parmulariaceae			168
				Aldona		3
				Aldonata		1
				Antoniomyces		1
				Apoa		1
				Aulacostroma		4
				Campoa		4
				Chaetaspis		1
				Coccodothis		1
				Cocconia		14			no data
				Cycloschizon		13			no data
				Cyclostomella		3
				Dictyocyclus		1
				Discodothis		1
				Dothidasteroma		4
				Englerodothis		3
				Ferrarisia		8			no data
				Hemigrapha		8			no data
				Hysterostomella		24
					Hysterostomella connari				sexual	Inácio et al. (2012)
				Hysterostomina		3
				Inocyclus		8			no data
				Kiehlia		1
				Lauterbachiella		2
				Microthyriolum		7			no data
				Mintera		1
				Pachypatella		1
				Palawaniella		6			no data
				Parmularia		10			no data
				Parmulariopsella		1
				Parmulariopsis		1
				Parmulina		5
				Perischizon		3
				Placomelan		1
				Polycyclina		1
				Polycyclus		2
				Protothyrium		3
				Pseudolembosia		5
				Rhagadolobium		7			no data
				Rhipidocarpon		1
				Schneepia		1
				Symphaeophyma		1
				Thallomyces		1
				Viegasella		1
			Not assigned	Andamanomyces		1			no data
		Asterotexales	Asterotexaceae	Asterotexis		2			sexual	Hongsanan et al. (2014b)
		Bezerromycetales	Bezerromycetaceae			3
				Bezerromyces		2			no data
				Xiliomyces		1			no data
		Botryosphaeriales				4239
			Aplosporellaceae			231
				Aplosporella		227			asexual	Hyde et al. (2013)
				Epicyta		1			no data
				Microhaplosporella		3			no data
			Botryosphaeriaceae			1818
				Alanphillipsia		5
				Amerodothis		3
				Apomella		2
				Auerswaldiella		7
				Barriopsis		6
				Botryobambusa		1
				Botryosphaeria		104
				Catosphaeropsis		1
				Cophinforma		2
				Coutinia		1
				Desmotascus		3
				Dichomera		24
				Diplodia		397			asexual	Hyde et al. (2013); Abdollahzadeh(2014)
				Dothiorella		250			asexual	Hyde et al. (2013)
				Endomelanconiopsis		2
				Epiphyma		1
				Eutiarosporella		7
				Fusicoccum		97
				Granulodiplodia		6
				Holcomyces		1
				Lasiodiplodia		47
				Leptasteromella		1
				Leptodothiorella		15
				Leptoguignardia		2
				Macrophoma		278			asexual	Proffer et al. (1989)
				Macrophomella		1
				Macrophomina		2
				Macrophomopsis		1
				Macroplodia		2
				Marasasiomyces		1
				Microbotryodiplodia		6
				Microdiplodia		295			asexual	Liu et al. (2012)
				Mucoharknessia		2
				Neodeightonia		7
				Neofusicoccum		39
				Neoscytalidium		3
				Neosphaeropsis		4
				Oblongocollomyces		1
				Phaeobotryon		6
				Phaeobotryosphaeria		6
				Phomatosphaeropsis		1
				Pseudofusicoccum		7
				Pyreniella		1
				Rostrosphaeria		1
				Sardiniella		1
				Septorioides		2
				Sivanesania		1
				Spencermartinsia		2
				Sphaeropsis		142			asexual	Liu et al. (2012)
				Striodiplodia		2
				Syndiplodia		4
				Thyrostroma		14
				Traversoa		1
			Melanopsaceae	Melanops		61			no data
			Phyllostictaceae			1740
				Caudophoma		1			no data
				Discochora		9			no data
				Guignardia		177			sexual	Wikee et al. (2011)
				Macrophyllosticta		22			no data
				Mesonella		1			no data
				Montagnellina		3			no data
				Pampolysporium		2			no data
				Phyllosticta		1487			asexual	Hyde et al. (2011)
				Phyllostictina		37			asexual	Nag Raj (1981a)
				Polysporidium		1			no data
			Planistromellaceae			76
				Comminutispora		1
				Diplochorella		4			no data
				Kellermania		23			asexual	Monkai et al. (2013); Hyde et al. (2011)
				Loratospora		2			sexual	Hyde et al. (2013)
				Microcyclus		23
					Microcyclus ulei				sexual	Le Guen et al. (2008)
				Piptarthron		2
				Planistroma		6			sexual	Minnis et al. (2012)
				Planistromella		13			sexual	Minnis et al. (2012)
				Pseudosphaerella		1
				Umthunziomyces		1
			Saccharataceae	Saccharata		16			no data
			Not assigned			297
				Alanomyces		1			no data
				Camarosporium		272			asexual	Liu et al. (2012)
				Hendersonula		23			asexual	Liu et al. (2012)
				Sclerotheca		1			no data
		Capnodiales				749
			Antennulariellaceae			39
				Achaetobotrys		3			sexual	Hyde et al. (2013)
				Antennariella		7			no data
				Antennulariella		5			sexual	Hyde et al. (2013)
				Capnodendron		1			asexual	Hyde et al. (2011)
				Capnodina		1			no data
				Capnofrasera		1			no data
				Ellisia		1			no data
				Heteroconium		20			asexual	Addy et al. (2005)
			Capnodiaceae			11
				Capnodium		1			sexual	Chomnunti et al. (2011)
				Phaeocryptopus		7			sexual	Thambugala et al. (2014a); Hyde et al. (2013)
				Scorias		1			no data
				Tripospermum		2			asexual	Hyde et al. (2011)
			Cladosporiaceae			313
				Acroconidiella		5			asexual	Hyde et al. (2013)
				Cladosporium		295			asexual	Hyde et al. (2013); Seifert et al. (2004)
				Davidiellomyces		1			no data
				Heterosporium		1			asexual	Guatimosim et al. (2016)
				Hormodendrum		3			no data
				Neocladosporium		1			no data
				Spadicesporium		7			no data
			Coccoideaceae			14
				Coccodiscus		1			no data
				Coccodothella		2			no data
				Coccoidea		2			no data
				Coccoidella		9
					Coccoidella perseae				sexual	Crous & Wingfield (1997)
			Davidiellaceae			29
				Davidiella		27			sexual	Dupuy et al. (2014)
				Graphiopsis		1			asexual	Hyde et al. (2013)
				Hoornsmania		1			asexual	Hyde et al. (2013)
			Dissoconiaceae	Dissoconium		4			no data
			Extremaceae	Extremus		2			asexual	Quaedvlieg et al. (2014)
			Floricolaceae	Floricola		1			asexual	Thambugala et al. (2015b)
			Metacapnodiaceae			33
				Capnobotrys		9			asexual	Hyde et al. (2011)
				Capnocybe		3			asexual	Hughes (1981)
				Capnophialophora		2			asexual	Hyde et al. (2011)
				Capnosporium		1			no data
				Hormiokrypsis		1			no data
				Metacapnodium		14			sexual	Hughes (1981)
				Ophiocapnocoma		3			no data
			Neodevriesiaceae	Neodevriesia		17			no data
			Piedraiaceae			7
				Piedraia		2			no data
				Trichophila		1			no data
				Trichosporum		4			no data
			Teratosphaeriaceae			179
				Acidiella		3
				Acidomyces		2
				Apenidiella		1
				Austroafricana		3
				Austrostigmidium		1
				Batcheloromyces		5			asexual	Crous et al. (2007)
				Catenulostroma		7			asexual	Crous et al. (2008)
				Devriesia		12			asexual	Scott et al. (2007)
				Eupenidiella		1
				Euteratosphaeria		1
				Hortaea		2
				Hyweljonesia		1
				Myrtapenidiella		8			no data
				Neocatenulostroma		3
				Neohortaea		1
				Neophaeothecoidea		1
				Neotrimmatostroma		3
				Nothostrasseria		1
				Oleoguttula		1
				Parapenidiella		2
				Parateratosphaeria		6			no data
				Penidiella		4
				Penidiellomyces		2
				Petrophila		1
				Pseudoteratosphaeria		6			no data
				Queenslandipenidiella		1
				Ramopenidiella		1
				Readeriella		23			asexual	Hyde et al. (2011)
				Simplicidiella		1
				Suberoteratosphaeria		3
				Teratoramularia		4
				Teratosphaeria		57			sexual	Hyde et al. (2011)
				Teratosphaericola		1
				Teratosphaeriopsis		1
				Xenopenidiella		7			no data
				Xenophacidiella		1
				Xenoteratosphaeria		1
			Not assigned			100
				Arthrocatena		1
				Baudoinia		5			no data
				Brunneomycosphaerella		1
				Capnobotryella		6			asexual	Scott et al. (2007)
				Capnocheirides		1
				Catenulomyces		1
				Constantinomyces		4			no data
				Elasticomyces		1
				Friedmanniomyces		2			no data
				Gangamyces		2
				Heptaster		3			asexual	Hughe & Seifert (2012)
				Hispidoconidioma		1
				Hyphospora		1
				Lapidomyces		1
				Meristemomyces		2
				Micropustulomyces		1
				Monticola		1
				Phaeocercospora		1
				Phaeotheca		4			asexual	De Hoog et al. (1998)
				Pseudotaeniolina		2
				Pseudovirgaria		2
				Rachicladosporium		12			no data
				Recurvomyces		1
				Scolecostigmina		22			asexual	Hyde et al. (2013)
				Sporidesmajora		1
				Toxicocladosporium		14			no data
				Vermiconia		3			no data
				Verrucocladosporium		2
				Xenosonderhenia		2
		Dothideales				780
			Dothideaceae			160
				Asteromellopsis		1
				Auerswaldia		4
				Bagnisiella		32			sexual	Ekanayaka et al. (2016)
				Dictyodothis		8			sexual	Thambugala et al. (2014a)
				Didymochora		1
				Dothidea		26			sexual	Thambugala et al. (2014a)
				Endoconidioma		1
				Guignardiella		1
				Haplodothella		1
				Lucidascocarpa		1
				Monographos		3
				Neocylindroseptoria		1
				Neophaeocryptopus		1
				Omphalospora		4
				Pachysacca		3
				Pediascus		1
				Phragmodothidea		1
				Phragmodothis		3
				Phyllachorella		2
				Podoplaconema		3
				Scirrhia		24
					Scirrhia pini				sexual	Barnes et al. (2016)
				Stylodothis		2
				Systremma		13			no data
				Vestergrenia		23			sexual	Hyde et al. (2013)
			Dothioraceae			173
				Blastophoma		2
				Botryochora		1
				Delphinella		6
				Diplosphaerella		1
				Dothichiza		22			asexual	Liu et al. (2012)
				Dothiora		40			sexual	Hyde et al. (2013)
				Elmerococcum		1
				Endodothiora		1
				Hormonema		6
				Jaffuela		1
				Japonia		1
				Kabatia		10
				Kabatina		5
				Leptodothiora		1
				Microphoma		5
				Parasclerophoma		1
				Plowrightia		17			sexual	Hyde et al. (2013)
				Rehmiellopsis		1
				Sarcophoma		3
				Schizophoma		1
				Sclerophoma		33			asexual	Hyde et al. (2011);Thambugala et al. (2014a)
				Stichophoma		1
				Sydowia		11			sexual	Hyde et al. (2011);Thambugala et al. (2014a)
				Tylophoma		1
				Yoshinagaia		1
			Saccotheciaceae			381
				Aureobasidium		23			asexual	De Hoog et al. (1998)
				Columnosphaeria		4
				Dematoidium		1
				Exobasidiopsis		1
				Falcispora		1
				Kabatiella		19			asexual	Hyde et al. (2011); Thambugala et al. (2014a)
				Ludwigiella		2
				Metasphaeria		190			no data
				Pleosphaerulina		25			no data
				Pringsheimia		8			sexual	Hyde et al. (2013)
				Pseudosarcophoma		1
				Pseudoseptoria		8
				Pseudosydowia		1
				Pullularia		3
				Saccothecium		9			sexual	Thambugala et al. (2014a)
				Selenophoma		85			asexual	Thambugala et al. (2014a)
			Not assigned			66
				Atramixtia		1			no data
				Celosporium		1			no data
				Microxyphispora		1			no data
				Placosphaeria		63			asexual	Hyde et al. (2011)
		Dyfrolomycetales	Dyfrolomycetaceae	Dyfrolomyces		4			sexual	Hyde et al. (2013)
		Hysteriales	Hysteriaceae			169
				Acrogenospora		12			asexual	Hyde et al. (2011)
				Actidiographium		1
				Aspidothelium		8			no data
				Cleistonium		1
				Gloniella		45
					Gloniella adianti				sexual	Almeida et al. (2014)
				Gloniopsis		28			no data
				Hypodermopsis		3
				Hysterium		48
					Hysterium angustatum				sexual	Almeida et al. (2014)
				Hysterobrevium		4			sexual	Hyde et al. (2011)
				Hysterocarina		1
				Hysterodifractum		1
				Hysteroglonium		2
				Hysteropatella		8			no data
				Oedohysterium		3
				Ostreichnion		3			sexual	Hyde et al. (2013)
				Pseudoscypha		1
		Jahnulales				35
			Aliquandostipitaceae			33
				Aliquandostipite		6			sexual	Hyde et al. (2013)
				Ascagilis		1
				Brachiosphaera		2			asexual	Hyde et al. (2013)
				Jahnula		14			sexual	Hyde et al. (2013)
				Megalohypha		1			sexual	Hyde et al. (2013)
				Patescospora		1
				Xylomyces		8			asexual	Hyde et al. (2013)
			Manglicolaceae	Manglicola		2			sexual
		Lichenoconiales	Lichenoconiaceae	Lichenoconium		16			unknown	Hyde et al. (2013)
		Lichenotheliales	Lichenotheliaceae			30
				Lichenostigma		28			asexual	Hyde et al. (2013)
				Lichenothelia		2			no data
		Microthyriales				872
			Micropeltidaceae			404
				Akaropeltella		1
				Akaropeltis		2
				Akaropeltopsis		1
				Armata		1
				Bonaria		3
				Chaetothyrina		15			sexual	Hyde et al. (2013)
				Clypeolina		3
				Cyclopeltella		1
				Cyclopeltis		2
				Dictyopeltella		2
				Dictyopeltis		9			no data
				Dictyostomiopelta		1
				Dictyothyriella		16			no data
				Dictyothyrina		4
				Dictyothyrium		22			no data
				Hansfordiopsis		1
				Haplopeltheca		1
				Hormopeltis		1
				Houjia		2
				Mendoziopeltis		2
				Micropeltella		30			no data
				Micropeltidium		25			no data
				Micropeltis		146			sexual	Hyde et al. (2013)
				Mitopeltis		1
				Muricopeltis		1
				Parapeltella		24			no data
				Phaeostomiopeltis		1
				Plochmopeltidella		2
				Scolecopeltella		6
				Scolecopeltis		15			no data
				Scolecopeltopsis		1
				Setopeltis		1
				Stigmatodothis		5
				Stigmatophragmia		1
				Stomiopeltella		7
				Stomiopeltis		40			sexual	Hyde et al. (2013)
				Stomiopeltopsis		2
				Stomiotheca		2
				Theciopeltis		2
				Thyriodictyella		1
				Verlandea		1
			Microthyriaceae			437
				Actinomyxa		1
				Actinopeltis		9			no data
				Arnaudiella		10			sexual	Hyde et al. (2013)
				Asteridiellina		1
				Asterinella		37			sexual	Wu et al. (2011)
				Asterinema		2
				Asterinopeltis		1
				Asteritea		1
				Asteronia		2
				Caenothyrium		2
				Calopeltis		2
				Calothyriella		2
				Calothyriopsis		4
				Calothyrium		17			no data
				Caribaeomyces		1
				Caudella		4
				Caudellopeltis		1
				Chaetothyriopsis		2
				Cirsosina		2
				Cirsosiopsis		1
				Corynocladus		1
				Cyclotheca		16			no data
				Cyrtidula		2
				Dasypyrena		2
				Dictyoasterina		1
				Dubujiana		1
				Govindua		1
				Halbaniella		4
				Hansfordiella		7			asexual	Hyde et al. (2013)
				Helminthopeltis		1
				Hidakaea		1
				Isthmospora		3
				Lembosiella		1
				Lichenopeltella		47			no data
				Macrographa		1
				Maublancia		7
				Micropeltopsis		1
				Microthyrina		3
				Microthyrium		88			sexual	Hyde et al. (2013)
				Opasterinella		1
				Pachythyrium		1
				Palawania		3
				Petrakiopeltis		1
				Phaeothyriolum		3
				Phragmaspidium		3
				Phragmothyrium		12			no data
				Platypeltella		3
				Polycyclinopsis		1
				Polystomellina		1
				Racodium		1
				Resendea		2
				Sapucchaka		1
				Scolecopeltidium		74			sexual	Hyde et al. (2013)
				Seynesiella		5
				Seynesiola		1
				Stegothyrium		1
				Synostomella		1
				Synpeltis		1
				Tothia		2
				Trichopeltella		1
				Trichopeltina		5
				Trichopeltospora		2
				Trichopeltum		4
				Trichothyriella		1
				Trichothyrina		5
				Trichothyrinula		2
				Trichothyriomyces		1
				Trichothyriopsis		3
				Trotteria		2
				Xenostomella		3
			Trichothyriaceae			28
				Trichopeltis		3			no data
				Trichopeltula		1			no data
				Trichothyrium		24			no data
			Not assigned			3
				Kirschsteiniothelia		1			no data
				Neomicrothyrium		1			no data
				Neoscolecobasidium		1			no data
		Minutisphaerales	Minutisphaeraceae	Minutisphaera		4			no data
		Muyocopronales	Muyocopronaceae			51			sexual	Hyde et al. (2013)
		Mycosphaerellales	Mycosphaerellaceae			6397
				Acervuloseptoria		2
				Achorodothis		2
				Acrocladium		1
				Acrodesmis		1
				Acrotheca		5
				Allantophomoides		1
				Amycosphaerella		1
				Anguillosporella		2
				Annellosympodiella		1
				Apseudocercosporella		1
				Ascospora		3
				Asperisporium		17
				Brunneosphaerella		3
				Camptomeriphila		1
				Caryophylloseptoria		4
				Cercoseptoria		23
				Cercospora		746			asexual	Hyde et al. (2013)
				Cercosporella		71
				Cercosporidium		7
				Cercosporina		5
				Cercostigmina		3
				Clypeispora		1
				Clypeosphaerella		2
				Colletogloeum		15
				Cucurbitariopsis		1
				Davisoniella		1
				Didymaria		7
				Didymellina		1
				Discella		12
				Distocercospora		4
				Dothistroma		3
				Elletevera		1
				Epicoleosporium		1
				Eriocercospora		3
				Eriocercosporella		2
				Euryachora		12
				Filiella		1
				Fusicladiella		6
				Fusoidiella		1
				Gillotia		4
				Gomphinaria		1
				Helicomina		8
				Isariopsis		6
				Jaczewskiella		1
				Kirramyces		4
				Laocoön		1
				Lecanosticta		6
				Melanodothis		1
				Microcyclosporella		1
				Micronectriella		1
				Miuraea		1
				Mucomycosphaerella		1
				Mycosphaerella		1278			sexual	Hyde et al. (2011)(2013)
				Mycosphaerelloides		1
				Mycovellosiella		33
				Neoceratosperma		4
				Neocercospora		1
				Neodeightoniella		1
				Neomycosphaerella		1
				Neopenidiella		1
				Neopseudocercospora		2
				Neopseudocercosporella		2
				Neoramichloridium		1
				Neoseptoria		1
				Oligostroma		1
				Ophiocarpella		1
				Oreophylla		1
				Ovosphaerella		1
				Ovularia		18
				Pallidocercospora		9
				Pantospora		1
				Paracercospora		3
				Paramycosphaerella		14
				Passalora		569			asexual	Hyde et al. (2011)(2013)
				Pazschkeella		2
				Periconiella		67
				Phacellium		21
				Phaeoisariopsis		21
				Phaeophleospora		22
				Phaeoramularia		31
				Phaeothecoidea		4
				Pharcidia		5
				Phloeospora		30
				Placocrea		1
				Polyphialoseptoria		2
				Polythrincium		1
				Pseudocercospora		1455			asexual	Hyde et al. (2013)
				Pseudocercosporella		95
				Pseudocercosporidium		1
				Pseudophaeoramularia		1
				Pseudostigmidium		5
				Quasiphloeospora		1
				Ragnhildiana		2
				Ramichloridium		30
				Ramularia		400
				Ramulariopsis		4
				Ramulispora		12
				Rhabdospora		63
				Ruptoseptoria		1
				Semipseudocercospora		2
				Septocylindrium		7
				Septoria		573			asexual	Goodwin (2007)
				Sirosporium		25
				Sonderhenia		2
				Sphaerella		13
				Sphaerellothecium		32
				Sphaerulina		71
				Stenella		43
				Stenellopsis		4
				Stigmidium		91
				Stigmina		82
				Stromatoseptoria		1
				Tandonella		1
				Uwebraunia		6
				Uwemyces		1
				Verrucisporota		7
				Walkeromyces		1
				Xenomycosphaerella		2
				Xenoramularia		3
				Zasmidium		199
		Myriangiales				369
			Elsinoaceae			311
				Beelia		3			no data
				Bitancourtia		2			no data
				Butleria		1
				Elsinoë		185			sexual	Rademacher (1992)
				Hyalotheles		1
				Manginia		1
				Melanobasidium		3			no data
				Melanophora		2			no data
				Micularia		2
				Molleriella		6			sexual	Jayawardena et al. (2014)
				Myxomyriangium		1
				Pycnopeltis		3			no data
				Saccardinula		11			no data
				Sphaceloma		82			asexual	Wijayawardene et al. (2012)
				Stephanotheca		3			sexual	Jayawardena et al. (2014)
				Uleomycina		1
				Xenodiella		1
				Xenodium		1
				Zukaliopsis		2
			Myriangiaceae			56			sexual	Hyde et al. (2013)
			Not assigned	Endosporium		2			no data
		Mytilinidiales				156
			Gloniaceae			55
				Cenococcum		2			asexual	Hyde et al. (2013)
				Glonium		36			no data
				Pseudocenococcum		1			no data
				Psiloglonium		16			sexual	Hyde et al. (2011)
			Mytilinidiaceae			101
				Actidium		6			sexual	Hyde et al. (2013)
				Bulliardella		1
				Camaroglobulus		1
				Halokirschsteiniothelia		1
				Lophium		5			sexual	Hyde et al. (2013)
				Mytilinidion		21			sexual	Hyde et al. (2013)
				Ostreola		8			sexual	Hyde et al. (2013)
				Peyronelia		4
				Pseudocamaropycnis		1
				Quasiconcha		1
				Scolecostroma		1
				Taeniolella		50			asexual	Ertz et al. (2016)
				Zoggium		1
		Natipusillales	Natipusillaceae	Natipusilla		4			sexual	Hyde et al. (2013)
		Patellariales	Patellariaceae			134
				Baggea		1
				Banhegyia		2			sexual	Yacharoen et al. (2015)
				Brunaudia		1
				Endotryblidium		1
				Eutryblidiella		4			no data
				Holmiella		2
				Lecanidiella		1
				Lecanidion		16			no data
				Lirellodisca		1
				Murangium		1
				Patellaria		34			sexual	Hyde et al. (2013)
				Poetschia		4			sexual	Yacharoen et al. (2015)
				Pseudoparodia		1
				Rhizodiscina		2
				Rhytidhysteron		17
					Rhytidhysteron brasiliense				sexual	Thambugala (2016)
					Rhytidhysteron opuntiae				sexual	Almeida et al. (2014)
					Rhytidhysteron rufulum				sexual	Thambugala (2016)
				Rhytidopeziza		1
				Schrakia		1
				Stratisporella		1
				Tryblidaria		27			sexual	Yacharoen et al. (2015)
				Tryblidiella		16			no data
		Phaeotrichales	Phaeotrichaceae			11			sexual	Hyde et al. (2013)
		Pleosporales				9410
			Acrocalymmaceae	Acrocalymma		6			no data
			Aigialaceae			14			sexual	Hyde et al. (2013)
			Amniculicolaceae			14
				Amniculicola		4			sexual	Hyde et al. (2013)
				Murispora		7			no data
				Neomassariosphaeria		1			no data
				Pseudomassariosphaeria		2			sexual	Ariyawansa et al. (2015)
			Amorosiaceae			9
				Amorosia		1			no data
				Angustimassarina		8
					Angustimassarina acerina				sexual	Thambugala et al. (2015b)
					Angustimassarina populi				sexual	Thambugala et al. (2015b)
					Angustimassarina quercicola				sexual	Thambugala et al. (2015b)
			Anteagloniaceae			8
				Anteaglonium		6
					Anteaglonium parvulum				sexual	Jayasiri et al. (2016)
					Anteaglonium thailandicum				sexual	Jayasiri et al. (2016)
				Flammeascoma		2			no data
			Ascocylindricaceae	Ascocylindrica		1			no data
			Bambusicolaceae			17
				Bambusicola		10
					Bambusicola irregulispora				asexual	Dai et al. (2012)
					Bambusicola massarinia				sexual	Dai et al. (2012)
					Bambusicola splendida				asexual	Dai et al. (2012)
				Longipedicellata		1			no data
				Magnicamarosporium		2			no data
				Neobambusicola		1			no data
				Palmiascoma		1			no data
				Sulcatispora		2			no data
			Biatriosporaceae			11			sexual	Hyde et al. (2013)
			Camarosporidiellaceae	Camarosporidiella		20			no data
			Caryosporaceae	Caryospora		10			sexual	Dubey et al. (1995)
			Coniothyriaceae			458
				Camarosporomyces		1			no data
				Coniothyrinula		1			no data
				Coniothyrium		452			asexual	Cortinas et al. (2006)
				Foliophoma		1			no data
				Hazslinszkyomyces		3			no data
			Corynesporascaceae	Corynespora		170			asexual	Hyde et al. (2011)(2013)
			Cucurbitariaceae			125
				Cucurbitaria		96			sexual	Hyde et al. (2013)
				Curreya		6			sexual	Hyde et al. (2013)
				Gemmamyces		1
				Leucothyridium		1
				Neocucurbitaria		3
				Pyrenochaetopsis		7			asexual	Hyde et al. (2013)
				Rhytidiella		4			sexual	Hyde et al. (2013)
				Syncarpella		7			sexual	Hyde et al. (2013)
			Cyclothyriellaceae	Cyclothyriella		1			no data
			Delitschiaceae			73			sexual	Hyde et al. (2013)
			Diademaceae			72			sexual	Hyde et al. (2013)
			Dictyosporiaceae			85
				Aquaticheirospora		1			no data
				Dictyocheirospora		9
					Dictyocheirospora aquatica				asexual	Wang et al. (2016)
					Dictyocheirospora garethjonesii				asexual	Wang et al. (2016)
					Dictyocheirospora rotunda				asexual	Wang et al. (2016)
				Dictyopalmispora		1			no data
				Dictyosporium		60					0
					Dictyosporium meiosporum				sexual	Boonmee et al. (2016)
					Dictyosporium palmae				asexual	Abdel-Aziz (2016)
					Dictyosporium sexualis				sexual	Boonmee et al. (2016)
					Dictyosporium tetrasporum				asexual	Cai & Hyde (2007)
				Jalapriya		3			no data
				Pseudodictyosporium		4			no data
				Speira		3			no data
				Vikalpa		4			no data
			Didymellaceae			2241
				Allophoma		7
				Ascochyta		726			asexual	Hyde et al. (2011)(2013)
				Ascochytella		13
				Ascochytula		6
				Basiascella		1
				Boeremia		13
				Calophoma		8
				Chaetasbolisia		7
				Chaetopyrena		8
				Chlamydosporium		1
				Deuterophoma		3
				Didymella		272			sexual	Hyde et al. (2013)
				Didymellocamarosporium		1
				Didysimulans		2
				Epicoccum		61			asexual	Hyde et al. (2013)
				Extrusothecium		2
				Heterophoma		6
				Leptophoma		1
				Leptosphaerulina		48			sexual	Hyde et al. (2013)
				Macroventuria		2
				Neoascochyta		9
				Neodidymella		1
				Neodidymelliopsis		7
				Neomicrosphaeropsis		7
				Nothophoma		7
				Paraboeremia		3
				Paratrichaegum		1
				Peyronellaea		23
				Phoma		898			asexual	Hyde et al. (2013)
				Phomatodes		2
				Piggotia		8
				Pithomyces		42
				Platychora		1
				Polyopeus		1
				Pseudoascochyta		2
				Scheleobrachea		1
				Sclerophomella		3
				Sclerophomina		1
				Scleropleella		1
				Stagonosporopsis		30
				Stemphyliomma		2
				Xenodidymella		3
			Didymosphaeriaceae			267
				Appendispora		2			sexual	Ariyawansa et al. (2014a)
				Brunneoclavispora		1
				Cryptodidymosphaeria		1
				Cytoplea		18			asexual	Hyde et al. (2011)
				Didymascina		1
				Didymosphaerella		1
				Didymosphaeria		200			sexual	Wanasinghe et al. (2016)
				Haplovalsaria		2
				Kalmusibambusa		1
				Laburnicola		4			no data
				Massariellops		1
				Neokalmusia		5			sexual	Wanasinghe et al. (2016)
				Neolophiostoma		1
				Paramassariosphaeria		2
				Phaeodothis		20			sexual	Wanasinghe et al. (2016)
				Pseudopithomyces		6			no data
				Verruculina		1
			Distoseptisporaceae	Distoseptispora		5			no data
			Dothidotthiaceae	Dothidotthia		11			no data
			Halojulellaceae	Halojulella		1			no data
			Halotthiaceae			3
				Halotthia		1			no data
				Phaeoseptum		1			no data
				Sulcosporium		1			no data
			Hypsostromataceae	Hypsostroma		2			no data
			Kirschsteiniotheliaceae			21
				Anacacumisporium		1			no data
				Kirschsteiniothelia		20			sexual but 4 asexual species	Bao et al. (2018)
					Kirschsteiniothelia emarceis				asexual	Bao et al. (2018)
					Kirschsteiniothelia lignicola				asexual	Bao et al. (2018)
					Kirschsteiniothelia submersa				asexual	Bao et al. (2018)
					Kirschsteiniothelia tectonae				asexual	Bao et al. (2018)
			Latoruaceae			5
				Latorua		1			no data
				Matsushimamyces		2
					Matsushimamyces bohaniensis				asexual	Sharma et al. (2015)
				Pseudoasteromassaria		2			no data
			Lentitheciaceae			62
				Aquilomyces		2			no data
				Coenosphaeria		1			no data
				Darksidea		6			no data
				Flavomyces		1			no data
				Katumotoa		1			no data
				Keissleriella		32
					Keissleriella dactylidis				sexual	Singtripopa (2015)
				Lentithecium		9			sexual	Hyde et al. (2013)
				Murilentithecium		1
				Neoophiosphaerella		1
				Poaceascoma		2			no data
				Setoseptoria		3			sexual	Phookamsak et al. (2015)
				Suttonomyces		1
				Towyspora		1
				Zopfinula		1			no data
			Leptosphaeriaceae			631
				Acicuseptoria		1
				Alloleptosphaeria		1
				Dendroleptosphaeria		1
				Didymolepta		2
				Heterospora		2
				Leptosphaeria		595			sexual	Hyde et al. (2013)
				Neoleptosphaeria		2
				Neophaeosphaeria		4			sexual	Hyde et al. (2013)
				Neosetophoma		6			asexual	Phookamsak et al. (2014)
				Parahendersonia		2
				Paraleptosphaeria		7			sexual	Hyde et al. (2013)
				Pseudoleptosphaeria		1
				Querciphoma		1
				Sclerodothis		1
				Subplenodomus		5			asexual	Hyde et al. (2013)
			Lindgomycetaceae			16			sexual	Hyde et al. (2013)
			Lophiostomataceae			220
				Alpestrisphaeria		2
				Biappendiculispora		1
				Brigantiella		1
				Byssolophis		2
				Capulatispora		1
				Ceriosporella		2
				Cilioplea		6			no data
				Coelodictyosporium		2
				Dimorphiopsis		1
				Guttulispora		1
				Lambottiella		4			no data
				Lophidiopsis		1
				Lophidium		2
				Lophiohelichrysum		1
				Lophionema		9			no data
				Lophiopoacea		2
				Lophiosphaera		11			no data
				Lophiostoma		103			sexual	Hyde et al. (2013)
				Lophiotricha		1
				Muroia		1
				Neotrematosphaeria		1
				Paucispora		2
				Platystomum		39
					Platystomum actinidiae				sexual	Thambugala et al. (2015b)
					Platystomum crataegi				sexual	Thambugala et al. (2015b)
					Platystomum rosae				sexual	Thambugala et al. (2015b)
					Platystomum salicicola				sexual	Thambugala et al. (2015b)
				Pseudomisturatosphaeria		1
				Pseudoplatystomum		1
				Quintaria		4			no data
				Sigarispora		7			sexual	Thambugala et al. (2015b)
				Trichometasphaeria		5			no data
				Vivianella		6			no data
			Lophiotremataceae			45
				Atrocalyx		2			no data
				Crassimassarina		1			no data
				Cryptoclypeus		2			no data
				Galeaticarpa		1			no data
				Lophiotrema		38			no data
				Pseudocryptoclypeus		1			no data
			Macrodiplodiopsidaceae			3
				Macrodiplodiopsis		2
					Macrodiplodiopsis desmazieri				asexual	Wijayawardene et al. (2014)
					Macrodiplodiopsis uniseriata				sexual	Wijayawardene et al. (2014)
				Pseudomonodictys		1			asexual	Wanasinghe et al. (2017)
			Massariaceae			67
				Cryptovalsaria		2			no data
				Decaisnella		9			no data
				Massaria		51			unknown	Hyde et al. (2013)
				Navicella		4			no data
				Neomassaria		1			no data
			Massarinaceae			360
				Bertiella		4			sexual	Hyde et al. (2013)
				Byssothecium		4			no data
				Ceratophoma		1
				Epiphegia		1
				Helminthosporium		223			sexual	Hesseltine et al. (1971)
				Massarina		99			sexual	Belliveau & Bärlocher (2005)
				Massarinula		14			no data
				Oraniella		1
				Phragmocamarosporium		2
				Phragmosperma		2
				Pseudodiaporthe		2
				Pseudodidymosphaeria		2			sexual	Thambugala et al. (2015a)
				Saccharicola		1
				Vaginatispora		4
					Vaginatispora fuckelii				sexual	Thambugala et al. (2015b)
			Melanommataceae			335
				Acrocordiopsis		2
				Alpinaria		1
				Aposphaeria		84			asexual	Hyde et al. (2011)
				Asymmetricospora		1
				Bicrouania		1
				Byssosphaeria		15			sexual	Hyde et al. (2013)
				Calyptronectria		3
				Caryosporella		1
				Fusiconidium		2
				Herpotrichia		62			sexual	Hyde et al. (2013)
				Javaria		2
				Macbridella		2
				Mamillisphaeria		1
				Melanocamarosporium		1
				Melanomma		80			sexual	Hyde et al. (2013)
				Moriolopis		1
				Muriformistrickeria		1
				Nigrolentilocus		5
				Ohleria		9
				Pleotrichocladium		1
				Pleurophomopsis		7
				Praetumpfia		1
				Pseudostrickeria		2
				Pseudotrichia		11
				Sarimanas		2
				Sporidesmiella		34			asexual	Hyde et al. (2013)
				Thysanolaenae		2
				Xenonectria		1
			Montagnulaceae			229
				Alloconiothyrium		1
				Bimuria		1
				Chaetosphaeropsis		3
				Cryptophaeella		1
				Deniquelata		1
				Didymocrea		1
				Kalmusia		26			sexual	Wanasinghe et al. (2016)
				Karstenula		22			sexual	Wanasinghe et al. (2016)
				Letendraea		12
				Microsphaeropsis		42			asexual	Hyde et al. (2011)(2013)
				Montagnula		30			sexual	Wanasinghe et al. (2016)
				Paracamarosporium		7
				Paraconiothyrium		17
				Paraphaeosphaeria		27			sexual	Wanasinghe et al. (2016)
				Phyllostictella		19
				Pseudocamarosporium		11
				Staurosphaeria		4
				Verrucoconiothyrium		3
				Xenocamarosporium		1
			Morosphaeriaceae			17
				Clypeoloculus		4			no data
				Helicascus		10			no data
				Morosphaeria		3			sexual	Hyde et al. (2013)
			Occultibambusaceae	Occultibambusa		7			no data
			Parabambusicolaceae			4
				Aquastroma		1			no data
				Multilocularia		1			no data
				Neoaquastroma		1			no data
				Parabambusicola		1			no data
			Paradictyoarthriniaceae	Paradictyoarthrinium		2			no data
			Phaeosphaeriaceae			1209
				Allophaeosphaeria		5
				Amarenomyces		1
				Ampelomyces		16
				Banksiophoma		1
				Barria		1
				Camarosporioides		1
				Carinispora		2
				Chaetoplea		23
				Cicinobolus		7
				Dendropleella		2
				Didymocyrtis		16
				Diederichomyces		1
				Diploplacosphaeria		1
				Entodesmium		8
				Equiseticola		1
				Eudarluca		8
				Galiicola		2
				Hadrospora		1
				Hendersonia		291			asexual	Hyde et al. (2011)
				Isthmosporella		1
				Juncaceicola		8
				Lautitia		1
				Melnikia		1
				Metameris		2
				Mixtura		1
				Monascostroma		6
				Muriphaeosphaeria		3
				Neosphaerellopsis		1
				Neostagonospora		4
				Neosulcatispora		2
				Nodulosphaeria		44			sexual	Hyde et al. (2013)
				Ocala		1
				Ophiobolus		160			sexual	Hyde et al. (2013)
				Ophiosimulans		1
				Ophiosphaerella		9
				Parabotryon		1
				Parastagonospora		15
				Phaeopoacea		2
				Phaeoseptoria		39
				Phaeosphaeria		163			sexual	Hyde et al. (2013)
				Phaeosphaeriopsis		12
				Pleoseptum		1
				Poaceicola		7
				Pocosphaeria		1
				Populocrescentia		1
				Premilcurensis		1
				Pseudophaeosphaeria		1
				Sclerostagonospora		12
				Scolecosporiella		6
				Setomelanomma		1
				Setophaeosphaeria		3
				Setophoma		6
				Sphaerellopsis		6
				Stagonospora		283			asexual	Hyde et al. (2011)
				Tiarospora		3
				Vagicola		2
				Vrystaatia		1
				Wojnowiciella		7
				Xenophaeosphaeria		1
				Xenoseptoria		1
			Pleomassariaceae			55
				Asteromassaria		4
					Asteromassaria macrospora				sexual	Wijayawardene et al. (2013)
				Lichenopyrenis		1			no data
				Peridiothelia		3			no data
				Pleomassaria		7			no data
				Prosthemium		7			asexual	Hyde et al. (2011)
				Scolicosporium		2			asexual	Hyde et al. (2011)
				Splanchnonema		31			sexual	Sarma (2015)
			Pleosporaceae			1482
				Alternaria		537			asexual	Hyde et al. (2011); Sarma (2015)
				Alternariaster		3
				Bipolaris		69
				Briansuttonomyces		1
				Chalastospora		2
				Cleistotheca		1
				Cochliobolus		23
				Curvularia		113			asexual	Hyde et al. (2011)
				Decorospora		1
				Dimorphosporicola		1
				Drechslera		36
				Edenia		2
				Embellisia		4
				Exserohilum		34
				Extrawettsteinina		2
				Gibbago		1
				Johnalcornia		1
				Kriegeriella		4
				Macrospora		2
				Macrosporium		13
				Malustela		1
				Neocamarosporium		11
				Neoplatysporoides		1
				Nimbya		11
				Paradendryphiella		2
				Platysporoides		11
				Pleospora		387			sexual	Câmara et al. (2002)
				Porocercospora		1
				Prathoda		1
				Pseudoyuconia		1
				Pyrenophora		97
					Pyrenophora teres				sexual	Akhavan et al. (2015)
					Pyrenophora triticirepentis				sexual	Singh & Hughes (2006)
				Scleroplea		1
				Stemphylium		90			asexual	Hyde et al. (2013)
				Tamaricicola		1
				Teretispora		1
				Trichoconiella		1
				Ulocladium		14
			Pseudoastrosphaeriellaceae	Pseudoastrosphaeriella		6			no data
			Roussoellaceae			38
				Elongatopedicellata		1			no data
				Neoroussoella		2			no data
				Roussoella		32			no data
				Roussoellopsis		3			no data
			Salsugineaceae	Salsuginea		1			sexual	Hyde et al. (2013)
			Shiraiaceae	Shiraia	Shiraia bambusicola	1			sexual	Liu et al. (2012)
			Sporormiaceae			165
				Chaetopreussia		1			no data
				Forliomyces		1
				Niesslella		1			no data
				Pleophragmia		4			no data
				Preussia		51			no data
				Preussiella		1			no data
				Sparticola		4			no data
				Sporormia		28			sexual	Hyde et al. (2013)
				Sporormiella		60			sexual	Sarma (2015)
				Spororminula		1			no data
				Westerdykella		13			no data
			Teichosporaceae			51
				Chaetomastia		10			no data
				Immotthia		3			no data
				Loculohypoxylon		1			no data
				Sinodidymella		5			no data
				Teichospora		32			sexual	Hyde et al. (2013)
			Testudinaceae			9			sexual	Hyde et al. (2013)
			Tetraplosphaeriaceae			28
				Polyplosphaeria		2			no data
				Pseudotetraploa		3			no data
				Quadricrura		3			asexual	Hyde et al. (2011)
				Shrungabeeja		4			no data
				Tetraploa		12			asexual	Hyde et al. (2011)
				Triplosphaeria		4			no data
			72			55
				Massariosphaeria		20			sexual	Sarma (2015)
				Parathyridaria		3			no data
				Thyridaria		32			no data
			Torulaceae			88
				Dendryphiella		11			asexual	Sarma (2015)
				Dendryphion		28			asexual	Su et al. (2016)
				Dwayamala		1			no data
				Hormiscium		9			no data
				Neotorula		2			no data
				Satwalekera		1			no data
				Torula		36			asexual	Su et al. (2016)
			Trematosphaeriaceae			88
				Emarellia		2			no data
				Trematosphaeria		86			sexual	Hyde et al. (2013)
			Wicklowiaceae	Wicklowia		1			no data
			Zopfiaceae			13
				Celtidia		1			no data
				Coronopapilla		2			no data
				Rechingeriella		3			no data
				Richonia		1			no data
				Zopfia		5			no data
				Zopfiofoveola		1			no data
			Not assigned			474
				Aegeanispora		1
				Amarenographium		3
				Anguillospora		12			asexual	Michel & Bärlocher (2005); Sarma (2015)
				Antealophiotrema		1
				Aquasubmersa		2
				Ascorhombispora		1
				Asterella		12
				Asterotheca		1
				Astrosphaeriella		52			no data
				Astrosphaeriellopsis		1
				Astrotheca		1
				Atradidymella		1
				Bambusistroma		1
				Berkleasmium		38
					Berkleasmium concinnum				asexual	Phookamsak et al. (2018)
					Berkleasmium nigroapicale				asexual	Hyde et al. (2007)
					Berkleasmium sutheppuiense				asexual	Hyde et al. (2007)
				Briansuttonia		1
				Centrospora		3
				Cheiromoniliophora		1
				Cheirosporium		2
				Clavariopsis		4
				Clematidis		1
				Coronospora		4
				Crassiparies		1
				Dactuliophora		4
				Dematium		1
				Digitodesmium		6
				Elegantimyces		1
				Falciformispora		3
				Farasanispora		1
				Fuscostagonospora		1
				Fusculina		1
				Gregarithecium		1
				Halomassarina		1
				Hobus		1
				Hyalobelemnospora		1
				Leptothyrium		79			asexual	Hyde et al. (2011) (2013)
				Libertasomyces		3
				Ligninsphaeria		1
				Lignosphaeria		2
				Longiostiolum		1
				Margaretbarromyces		1
				Medicopsis		1
				Multiseptospora		2
				Mycocentrospora		12
				Neomassarina		1
				Ochrocladosporium		3
				Ostropella		9
				Parameliola		2
				Paraphoma		8
				Periconia		100			asexual	Hyde et al. (2013)
				Perthomyces		1
				Phaeomycocentrospora		1
				Phaeostagonospora		1
				Phellinocrescentia		1
				Plenodomus		35			asexual	Hyde et al. (2011)(2013)
				Podoconis		2
				Pseudocoleophoma		3
				Pseudolophiotrema		1
				Pseudorobillarda		15
				Pseudosplanchnonema		1
				Pseudoxylomyces		1
				Slafractonia		1
				Sporocybe		8
				Tingoldiago		1
				Trinosporium		1
				Versicolorisporium		1
				Xenobotryosphaeria		1
				Xenolophium		7
				Xenophoma		1
		Stigmatodiscales	Stigmatodiscaceae			3
				Asterodiscus		1			no data
				Stigmatodiscus		2
					Stigmatodiscus enigmaticus				asexual	Voglmayr et al. (2016)
					Stigmatodiscus pruni				asexual	Voglmayr et al. (2017)
		Strigulales	Strigulaceae			67
				Discosiella		1			asexual	Richardson (2003)
				Strigula		66
					Strigula nitidula				sexual	Nag Raj (1981b)
		Superstratomycetales	Superstratomycetaceae			14
				Ameliella		2			no data
				Normandina		2			no data
				Paracollema		1			no data
				Pseudohepatica		2			no data
				Steinia		2			no data
				Superstratomyces		3			no data
				Wadeana		2			no data
		Tirisporellales	Tirisporellaceae			2
				Bacusphaeria		1			no data
				Tirisporella		1			no data
		Trypetheliales				148
			Polycoccaceae			46
				Clypeococcum		6			no data
				Polycoccum		40			sexual	Ertz et al. (2016)
			Trypetheliaceae			102
				Aptrootia		1
				Architrypethelium		3			no data
				Astrothelium		13			no data
				Bathelium		5			no data
				Campylothelium		4			no data
				Cryptothelium		1
				Laurera		19			no data
				Marcelaria		2
				Megalotremis		7			no data
				Mycomicrothelia		21			no data
				Polymeridium		7			no data
				Pseudopyrenula		4			no data
				Trypethelium		15			sexual	Hyde et al. (2013)
		Tubeufiales				369
			Tubeufiaceae			367
				Acanthohelicospora		3
				Acanthophiobolus		3
				Acanthostigma		40			sexual	Hyde et al. (2013)
				Acanthostigmella		6
				Acanthostigmina		2
				Allonecte		1
				Amphinectria		1
				Annajenkinsia		1
				Aquaphila		2
				Boerlagella		1
				Boerlagiomyces		8
				Borinquenia		1
				Byssocallis		2
				Chaetocrea		1
				Chaetosphaerulina		6
				Chlamydotubeufia		6
				Dictyospora		1
				Glaxoa		1
				Guelichia		1
				Helicangiospora		1
				Helicodochium		1
				Helicoma		51			asexual	Hyde et al. (2011) (2013)
				Helicomyces		16
				Helicoön		21			asexual	Tanney & Miller (2017)
				Helicopsis		1
				Helicosporium		31			asexual	Hyde et al. (2011) (2013)
				Letendraeopsis		1
				Linobolus		1
				Malacaria		7
				Melioliphila		10
				Muripulchra		1
				Neoacanthostigma		8
				Neohelicomyces		3
				Ophiochaeta		6
				Ophiosphaeria		1
				Pendulispora		1
				Podonectria		9
				Puttemansia		16
				Rebentischia		10
				Tamhinispora		1
				Taphrophila		4
				Tetracrium		6
				Thaxteriella		10
				Titaea		15
				Tubeufia		27			sexual	Hyde et al. (2013)
				Uredinophila		2
				Xenosporella		1
				Xenosporium		18
			Not assigned			2
				Neorhamphoria		1			no data
				Parawiesneriomyces		1			no data
		Valsariales	Valsariaceae			35
				Pseudothyridaria		1			no data
				Valsaria		34			asexual	Jaklitsch et al. (2015)
		Venturiales				545
			Sympoventuriaceae			2
				Sympoventuria		1			sexual	Machouart et al. (2014)
				Veronaeopsis		1			asexual	Hyde et al. (2013)
			Venturiaceae			542
				Acantharia		7
				Aloysiella		1
				Antennaria		6
				Antennularia		16			no data
				Anungitea		19			no data
				Anungitopsis		6
				Aphysa		2
				Apiosporina		3
				Arkoola		1
				Arnaudia		1
				Asterula		3
				Atopospora		4
				Botryostroma		3
				Caproventuria		1
				Coleroa		28			sexual	Hyde et al. (2013)
				Crotone		2
				Cylindrosympodioides		1
				Cylindrosympodium		8
				Dictyodochium		1
				Dimerosporiopsis		1
				Ectosticta		9
				Fusicladium		82			asexual	Hyde et al. (2011)
				Gelatosphaera		2
				Gibbera		51			no data
				Hormotheca		2
				Karakulinia		1
				Lasiobotrys		4
				Lineostroma		1
				Maireella		2
				Metacoleroa		1
				Monopus		1
				Montagnina		1
				Napicladium		13			no data
				Periline		1
				Phaeosphaerella		29			no data
				Phaeosporella		1
				Phragmogibbera		2
				Pollaccia		2
				Polyrhizon		7
				Protoventuria		19			sexual	Hyde et al. (2013)
				Pseudocladosporium		2
				Pseudoparodiella		1
				Pseudotthia		1
				Pyrenobotrys		2
				Rhizogene		2
				Rhizosphaera		8
				Robledia		1
				Rosenscheldiella		19			no data
				Sivanesaniella		1
				Spilocaea		3
				Spilodochium		4
				Spilosticta		9
				Trichodothella		1
				Trichodothis		3
				Uleodothis		8
				Venturia		121			sexual	Beck et al. (2005)
				Xenomeris		11
			Not assigned	Clavatispora		1			no data
		Zeloasperisporiales	Zeloasperisporiaceae	Zeloasperisporium		7			asexual	Hongsanan & Hyde (2017)
		Not assigned				2413
			Argynnaceae			3			sexual	Hyde et al. (2013)
				Argynna		1
				Lepidopterella		2
			Arthopyreniaceae	Arthopyrenia		23			sexual	Hyde et al. (2013)
			Ascoporiaceae	Ascoporia		1			no data
			Aspidotheliaceae			4
				Aspidopyrenis		1			no data
				Aspidopyrenium		1			no data
				Aspidotheliomyces		1			no data
				Patellonectria		1			no data
			Brefeldiellaceae	Brefeldiella		4			sexual	Hyde et al. (2013)
			Cookellaceae			22
				Calolepis		1			no data
				Cookella		4			no data
				Hyalocurreya		1			no data
				Myriangina		1			no data
				Myrianginella		1			no data
				Phaneroascus		1			no data
				Pycnoderma	Pycnoderma bambusinum	1			sexual	Hongsanan et al. (2014a)
				Pycnodermina		1			no data
				Uleomyces		11			no data
			Dacampiaceae			5
				Eopyrenula		4			no data
				Pyrenidium		1			no data
			Englerulaceae			237
				Capnodiastrum		8
				Clypeolella		6
				Coniosporiella		1
				Diathrypton		1
				Englerula		10			sexual	Hyde et al. (2013)
				Englerulella		2
				Goosia		1
				Linotexis		1
				Mitteriella		3
				Parenglerula		7
				Questieria		2
				Questieriella		18			asexual	Hyde et al. (2011)(2013)
				Rhizotexis		1
				Rhytidenglerula		10			sexual	Hyde et al. (2013)
				Sarcinella		67			asexual	Hyde et al. (2011)
				Schiffnerula		96			sexual	Hyde et al. (2013)
				Thrauste		3
			Eremomycetaceae			14
				Arthrographis		10			asexual	Hyde et al. (2011)
				Eremomyces		1			unknown	Hyde et al. (2013)
				Pyrenothrix		2			unknown	Hyde et al. (2013)
				Rhexothecium		1			no data
			Euantennariaceae			42
				Antennatula		10			asexual	Hyde et al. (2011)(2013)
				Capnokyma		2
				Chaetosaccardinula		1
				Euantennaria		9			sexual	Hyde et al. (2013)
				Hormisciella		2
				Hormisciomyces		3			asexual	Hyde et al. (2011)(2013)
				Ophiocapnodium		1
				Plokamidomyces		1
				Rasutoria		4			sexual	Hyde et al. (2013)
				Skoteinospora		2
				Strigopodia		4			sexual	Hyde et al. (2013)
				Trichopeltheca		2
				Trichothallus		1
			Fenestellaceae			36
				Fenestella		24			no data
				Lojkania		10			no data
				Sydowina		2			no data
			Leptopeltidaceae			18
				Dothiopeltis		2			no data
				Leptopeltis		8			no data
				Leptopeltopsis		1			no data
				Moesziella		1			no data
				Nannfeldtia		2			no data
				Opegraphellomyces		1			no data
				Phacidina		1			no data
				Ronnigeria		1			no data
				Staibia		1			no data
			Meliolinaceae			51
				Briania		1			asexual	Hyde et al. (2011)
				Meliolina		50			no data
			Mesnieraceae			7			sexual	Hyde et al. (2013)
			Microtheliopsidaceae			3			sexual	Hyde et al. (2013)
			Moriolaceae	Moriola		17			sexual	Hyde et al. (2013)
			Mycoporaceae	Mycoporum		7			sexual	Hyde et al. (2013)
			Naetrocymbaceae			16
				Jarxia		1			no data
				Leptorhaphis		7			no data
				Naetrocymbe		4			sexual	Hyde et al. (2013)
				Tomasellia		4			no data
			Paranectriellaceae	Paranectriella		8			no data
			Parodiellaceae			27
				Diplodiopsis		1			no data
				Parodiella		23			no data
				Pyrenochaetina		3			no data
			Parodiopsidaceae			211
				Alina		1
				Asteromyxa		1
				Balladyna		36			no data
				Balladynocallia		3			no data
				Balladynopsis		9			no data
				Chevalieropsis		1
				Cleistosphaera		1
				Dimeriella		26			no data
				Dimerium		73			no data
				Dysrhynchis		3			no data
				Hyalomeliolina		2
				Leptomeliola		13			no data
				Neohoehnelia		1
				Neoparodia		1
				Ophioparodia		1
				Parodiellina		1
				Phaeophragmeriella		8			no data
				Pilgeriella		2
				Scolionema		1
				Septoidium		16			asexual	Hyde et al. (2011)(2013)
				Stomatogene		3
				Tretospora		8			no data
			Perisporiopsidaceae			22
				Cicinnobella		1			no data
				Parodiopsis		2			no data
				Perisporina		1			no data
				Perisporiopsis		17			no data
				Piline		1			no data
			Phyllobatheliaceae			7
				Phyllobathelium		5			no data
				Phyllocratera		2			no data
			Pleomonodictydaceae	Pleomonodictys		2			no data
			Polystomellaceae			51
				Coscinopeltis		1			no data
				Dothidella		35			no data
				Munkiella		1			no data
				Parastigmatea		7			no data
				Pluriporus		1			no data
				Polystomella		6			sexual	Preobrazhenskaya &Tarasova (2004)
			Protoscyphaceae	Protoscypha		2			sexual	Hyde et al. (2013)
			Pseudoperisporiaceae			268
				Acanthostoma		2
				Aphanostigme		21			no data
				Astiothyrium		1
				Bryochiton		5
				Bryomyces		9			no data
				Calochaetis		1
				Capnodinula		2
				Ceratosperma		1
				Chaetosticta		4
				Chaetyllis		1
				Chilemyces		1
				Dimeriellopsis		4
				Dimerina		35			no data
				Dimerinopsis		1
				Epipolaeum		15			no data
				Episphaerella		11			no data
				Eudimeriolum		16			no data
				Eumela		4
				Gomezina		1
				Lasiostemma		7
				Lizonia		16			no data
				Myxophora		7
				Nematostigma		5
				Nematostoma		17			no data
				Nematothecium		5
				Neocoleroa		3
				Ontostheca		1
				Ophiogene		1
				Phaeodimeriella		28			no data
				Phaeostigme		5
				Phragmeriella		1
				Pilula		1
				Plactogene		1
				Pododimeria		4
				Porostigme		3
				Raciborskiomyces		2
				Somatexis		1
				Stigme		4
				Toroa		1
				Trichocicinnus		3
				Wentiomyces		16			no data
				Zeta		1
			Pyrenothricaceae	Cyanoporina		1			no data
			Schizothyriaceae			190			sexual	Phookamsak et al. (2016)
			Seuratiaceae			11
				Actinomma		1			no data
				Atichia		1			no data
				Atichiopsis		1			no data
				Morularia		1			no data
				Myriophysella		1			no data
				Phaeophycopsis		1			no data
				Phycopsis		2			no data
				Seuratia		2			no data
				Seuratiopsis		1			no data
			Seynesiopeltidaceae	Seynesiopeltis		1			sexual	Hyde et al. (2013)
			Vizellaceae			42
				Blasdalea		1			no data
				Chrysogloeum		1			asexual	Hyde et al. (2011)
				Entopeltis		4			no data
				Haplopyrenula		3			no data
				Hypocelis		1			no data
				Phaeopeltis		1			no data
				Singeriella		1			no data
				Stigmatopeltis		1			no data
				Vizella		29			no data
			Not assigned			1060
				Achorella		9
				Acrogenotheca		3
				Aenigmatomyces		1
				Alascospora		1
				Allosoma		4
				Amylirosa		2
				Apiosporella		5
				Ascominuta		2
				Ascostratum		2
				Asteromella		227			asexual	Hyde et al. (2011)
				Atrosynnema		1
				Austropleospora		1
				Bactrodesmium		44			asexual	Hyde et al. (2011)
				Bahugada		2
				Bahusakala		4
				Belizeana		1
				Bertossia		1
				Botryohypoxylon		1
				Brachyconidiella		1
				Braunomyces		1
				Brevicatenospora		1
				Brooksia		1
				Bryopelta		1
				Bryorella		13
				Bryosphaeria		9
				Bryostroma		7
				Bryothele		2
				Buelliella		14
				Byssogene		2
				Calyptra		5
				Camarosporula		1
				Capillataspora		1
				Capnogonium		1
				Capsicispora		1
				Catinella		3
				Catulus		1
				Ceratocarpia		2
				Cercidospora		31			no data
				Cerodothis		1
				Chaetomelanops		1
				Chaetoscutula		1
				Chermomyces		2
				Ciferriomyces		2
				Cladoriella		3
				Clypeostroma		2
				Coccochora		2
				Coccochorella		1
				Colensoniella		1
				Crauatamyces		1
				Cryomyces		4
				Cyclothyrium		2
				Cyrtidium		1
				Cyrtopsis		1
				Dawsophila		3
				Dendryphiopsis		5
				Dermatodothella		1
				Dermatodothis		7
				Dianesea		1
				Didymocyrtidium		3
				Didymopleella		2
				Dilophia		1
				Dilophospora		2
				Diplochorina		1
				Disculina		2
				Dolabra		1
				Elmerinula		1
				Endococcus		34			no data
				Epibotrys		1
				Exosporina		2
				Flavobathelium		1
				Gibberidea		11
				Gilletiella		3
				Globoa		2
				Globulina		20			no data
				Gloeodiscus		1
				Grandigallia		1
				Griggsia		1
				Hansfordiellopsis		5
				Harknessiella		1
				Hassea		1
				Heleiosa		1
				Heptameria		3
				Heterosphaeriopsis		1
				Hiospira		2
				Homortomyces		2
				Homostegia		16
				Hyalocrea		2
				Hyalosphaera		4
				Hyalotexis		1
				Hypobryon		7
				Hysteropeltella		1
				Hysteropsis		7
				Iledon		1
				Incertomyces		2
				Isalonactis		1
				Isomunkia		1
				Kamalomyces		2
				Karschia		25			sexual	Thambugala et al. (2014b)
				Keisslerellum		1
				Keratosphaera		6
				Kirschsteiniella		4
				Koordersiella		7
				Kusanobotrys		2
				Lanatosphaera		2
				Laterotheca		1
				Lazarenkoa		1
				Leptospora		11
				Leveillina		3
				Licopolia		2
				Lidophia		1
				Lineolata		1
				Lophiosphaerella		2
				Macrovalsaria		2
				Manoharachariella		4
				Megaloseptoria		1
				Melanochlamys		2
				Microcyclella		2
				Microdothella		5
				Minteriella		1
				Montagnella		9
				Moriolomyces		1
				Mycocryptospora		1
				Mycoglaena		11
				Mycoporellum		13
				Mycoporopsis		10
				Mycothyridium		8
				Myriangiopsis		1
				Myriostigmella		1
				Neodactylaria		1
				Neoventuria		1
				Norrlinia		1
				Otthiella		1
				Parmulariella		1
				Passeriniella		5
				Peltaster		13
				Penidiellopsis		2
				Peroschaeta		1
				Perusta		1
				Phaeocyrtidula		2
				Phaeopeltosphaeria		6
				Phaeopolystomella		1
				Phaeosclera		1
				Phaeothecoidiella		2
				Phaeotomasellia		1
				Phanerococculus		1
				Phanerococcus		3
				Philobryon		1
				Philonectria		7
				Phragmoscutella		1
				Phycorella		1
				Physalosporopsis		1
				Placostromella		3
				Plagiostromella		4
				Plectophoma		4
				Pleiostomellina		1
				Pleosphaerellula		2
				Pleosphaeropsis		4
				Pleostigma		9
				Pleotrichiella		1
				Pleurostromella		17
				Polysporidiella		1
				Polystomellopsis		1
				Porterula		1
				Prolisea		1
				Pseudomorfea		1
				Pseudopleospora		3
				Pseudoramichloridium		3
				Pteridiospora		5
				Pteropus		1
				Punctillum		1
				Pycnocarpon		4
				Pyrenochaeta		3
				Pyrenochium		1
				Pyrenocyclus		1
				Pyrenostigme		1
				Racovitziella		1
				Ramimonilia		1
				Repetophragma		34			no data
				Rosellinula		4
				Rosenscheldia		6
				Roumegueria		1
				Sampaioa		1
				Santiella		2
				Saxomyces		2
				Scleroconidioma		1
				Scolecobonaria		2
				Semifissispora		4
				Semisphaeria		1
				Septonema		38			asexual	Hyde et al. (2011) (2013)
				Septoriella		23
					Septoriella allojunci				asexual	Li et al.(2015)
				Soloacrosporiella		1
				Sporidesmioides		1
				Sporidesmium		9
				Stictochorella		9
				Stictochorellina		1
				Stuartella		4
				Syrropeltis		2
				Teichosporella		16
				Teratoschaeta		1
				Thalassoascus		3
				Thelenidia		1
				Thelenidiomyces		1
				Thryptospora		1
				Thyrospora		3
				Tilakiella		1
				Tomeoa		1
				Tremateia		2
				Tyrannosorus		1
				Vizellopsis		1
				Westea		1
				Wongia		2
				Xylosphaeria		4
				Yoshinagella		2
	Eurotiomycetes					3264	multicellular	Lumbsch (2000)
		Arachnomycetales	Arachnomycetaceae			14
				Arachnomyces		10
					Arachnomyces gracilis				sexual	Gibas et al. (2002)
					Arachnomyces kanei				sexual	Gibas et al. (2002)
				Onychocola		4			asexual	Hyde et al. (2011)
		Ascosphaeraceae				30
			Ascosphaeraceae			30
				Arrhenosphaera		1			sexual	Geiser & LoBuglio (2001)
				Ascosphaera		27			sexual	Geiser & LoBuglio (2001)
				Bettsia		2			sexual	Geiser & LoBuglio (2001)
		Chaetothyriales				612
			Chaetothyriaceae			153
				Actinocymbe		3			no data
				Aphanophora		1
				Atrokylindriopsis		1
				Brunneodinemasporium		2			asexual	Maharachchikumbura et al. (2016)
				Camptophora		1
				Ceramothyrium		33			no data
				Chaetothyriomyces		1
				Chaetothyrium		47			no data
				Euceramia		1
				Kazulia		2			no data
				Merismella		6
					Merismella concinna				asexual	Hofmann & Piepenbring (2006)
				Microcallis		10			no data
				Phaeosaccardinula		26
					Phaeosaccardinula dendrocalami				sexual	Yang et al. (2014)
					Phaeosaccardinula multiseptata				sexual	Yang et al. (2014)
				Stanhughesia		1
				Treubiomyces		7
				Yatesula		2			no data
				Zukalia		9			no data
			Coccodiniaceae			54
				Bisbyopeltis		1			asexual	Chomnunti et al. (2014)
				Coccodinium		4			no data
				Dennisiella		9			no data
				Deslandesia		3			no data
				Limacinula		13			no data
				Microxiphium		14			asexual	Chomnunti et al. (2014)
				Shanoriella		1			no data
				Teichosporina		1			no data
				Vitalia		8			no data
			Cyphellophoraceae			23
				Cyphellophora		22			asexual	Réblová & Seifert (2007)
				Kumbhamaya		1			asexual	Tenguria & Firodiya (2015)
			Epibryaceae	Epibryon		45			no data
			Herpotrichiellaceae			241
[truncated: 6,268 more rows]

## Sheet: Basidiomycota
Phylum	Class	Order	Family	Genus	Species	Species richness	Unicellular/multicellular	Reference for cellular	Sexual/asexual	Reference for reproduction
Basidiomycota						48409
	Agaricomycetes					36412
		Agaricales				23225	multicellular	Lawrey et al. (2009)	sexual	Aanen et al. (2000)
			Agaricaceae			2772
			Amanitaceae			706
			Biannulariaceae			3
			Bolbitiaceae			430
			Broomeiaceae			2
			Chromocyphellaceae			5
			Clavariaceae			316
			Cortinariaceae			3194
			Cyphellaceae			92
			Entolomataceae			2037
			Fistulinaceae			12
			Hemigasteraceae			2
			Hydnangiaceae			85
			Hygrophoraceae			705
			Hymenogastraceae			1631
			Inocybaceae			1543
			Lyophyllaceae			278
			Marasmiaceae			1626
			Mycenaceae			1606
			Niaceae			89
			Omphalotaceae			603
			Phelloriniaceae			3
			Physalacriaceae			340
			Pleurotaceae			357
			Pluteaceae			481
			Porotheleaceae			14
			Psathyrellaceae			951
			Pterulaceae			176
			Schizophyllaceae			14
			Strophariaceae			569
			Tricholomataceae			2225
			Tubariaceae			74
			Typhulaceae			128
			Not assigned			156
		Amylocorticiales	Amylocorticiaceae			46
				Amyloathelia		3	no data		no data
				Amylocorticiellum		7	no data		no data
				Amylocorticium		11	no data		no data
				Amyloxenasma		6	no data		no data
				Ceraceomyces		16	no data		no data
				Irpicodon		1	no data		no data
				Podoserpula		2	no data		no data
		Atheliales	Atheliaceae			110
				Amphinema		4	no data		no data
				Athelia		31	no data
					Athelia arachnoidea				sexual	Adams & Kropp (1996)
					Athelia rolfsii				sexual	Singh et al. (1996)
				Athelicium		2	no data
				Athelocystis		1
				Athelopsis		16	no data		no data
				Butlerelfia		1
				Byssocorticium		8	no data		no data
				Byssoporia		1
				Digitatispora		2
				Elaphocephala		1
				Fibulomyces		3	no data		sexual	Marvanová & Stalpers (1987)
				Hypochnella		2
				Hypochniciellum		1
				Leptosporomyces		14	no data
					Leptosporomyces galzinii				sexual	Marvanová & Stalpers (1987)
				Lobulicium		1
				Lyoathelia		1
				Melzericium		3	no data		no data
				Mycostigma		1
				Piloderma		7	no data		no data
				Pteridomyces		4	no data		no data
				Taeniospora		2			asexual	Descals (1998)
				Tretomyces		2
				Tylospora		2
		Auriculariales				288
			Auriculariaceae			161
				Auricularia		37	multicellular	Chang & Buswell (1996)	no data
				Eichleriella		13	no data		no data
				Exidia		35	multicellular	Dendup et al. (2018)	no data
				Exidiopsis		30	no data		no data
				Fibulosebacea		1	no data		no data
				Heterochaete		40	no data		no data
				Hirneolina		1	no data		no data
				Pseudostypella		1	no data		no data
				Tremellochaete		3	no data		no data
			Oliveoniaceae	Oliveonia		5	no data		sexual	Sudheep & Sridhar (2012)
			Not assigned			122
				Amphistereum		2
				Aporpium		3
				Atractobasidium		1
				Basidiodendron		18	no data		no data
				Bourdotia		3
				Ceratosebacina		3
				Dendrogloeon		1
				Ductifera		12	no data		no data
				Elmerina		10	no data		no data
				Endoperplexa		6	no data		no data
				Gloeotromera		1
				Guepinia		5	no data		no data
				Hauerslevia		1
				Heteroacanthella		3
				Heteroradulum		7	no data		no data
				Heterorepetobasidium		2
				Heteroscypha		1
				Metabourdotia		1
				Microsebacina		2
				Patouillardina		1
				Porpopycnis		1
				Protodaedalea		1
				Protodontia		4	no data		no data
				Protohydnum		2
				Protomerulius		5	no data		no data
				Protoradulum		1
				Pseudohydnum		1
				Renatobasidium		1
				Sclerotrema		1
				Serendipita		11			sexual	Weiß et al. (2016)
					Serendipita indica		multicellular	Nizam et al. (2018)
				Stypella		11	no data
					Stypella variabilis				sexual	Olive (1984)
		Boletales				2173	multicellular	Cai et al. (2017)
			Boletaceae			1398
				Afroboletus		8
				Alessioporus		2
				Aureoboletus		33			no data
				Austroboletus		33			no data
				Baorangia		3
				Binderoboletus		1
				Boletellus		52			no data
				Boletochaete		5
				Boletus		282			no data
				Borofutus		1
				Bothia		2
				Buchwaldoboletus		12
				Butyriboletus		28
				Caloboletus		13
				Castellanea		1
				Chalciporus		25
				Chamonixia		3
				Chiua		4
				Costatisporus		1
				Crocinoboletus		2
				Cyanoboletus		7
				Fistulinella		24
				Gastroboletus		13
				Gastroleccinum		1
				Guyanaporus		1
				Harrya		6
				Heimiella		1
				Heimioporus		15
				Heliogaster		1
				Hemileccinum		5
				Hortiboletus		7
				Hourangia		4
				Hymenoboletus		1
				Imleria		5
				Imperator		3
				Ixechinus		1
				Jimtrappea		1
				Kombocles		1
				Krombholziella		6
				Lanmaoa		7
				Leccinellum		13
				Leccinum		131			no data
				Mucilopilus		1
				Mycoamaranthus		3
				Neoboletus		6
				Octaviania		50			no data
				Parvixerocomus		2
				Paxillogaster		1
				Phylloboletellus		1
				Phyllobolites		2
				Phylloporus		83			no data
				Porphyrellus		19
				Pseudoaustroboletus		1
				Pseudoboletus		2
				Pulchroboletus		1
				Pulveroboletus		38			no data
				Retiboletus		11
				Rheubarbariboletus		2
				Rhodactina		2
				Rhodobolites		1
				Rossbeevera		10
				Royoungia		6
				Rubinoboletus		5
				Rubroboletus		10
				Rugiboletus		2
				Setogyroporus		1
				Singerocomus		2
				Singeromyces		1
				Sinoboletus		10
				Solioccasus		1
				Spongiforma		2
				Strobilomyces		33
				Suillellus		19
				Sutorius		16
				Tengioboletus		2
				Trappeindia		1
				Tubosaeta		6
				Turmalinea		4
				Tylocinum		1
				Tylopilus		122			no data
				Veloporphyrellus		7
				Wakefieldia		2
				Xanthoconium		10
				Xerocomellus		17
				Xerocomus		111			no data
				Zangia		6
			Boletinellaceae			24
				Boletinellus		6			no data
				Phaeogyroporus		1			no data
				Phlebopus		17			no data
			Calostomataceae	Calostoma		27			no data
			Coniophoraceae			27
				Chrysoconia		1			no data
				Coniophora		24			no data
				Gyrodontium		1			no data
				Meruliporia		1			no data
			Diplocystidiaceae			19
				Astraeus		11			sexual	Hosoya & Otani (1995)
				Diplocystis		5			no data
				Diploderma		1			no data
				Endogonopsis		1			no data
				Tremellogaster		1			no data
			Gasterellaceae	Gasterella		1			no data
			Gastrosporiaceae	Gastrosporium		2			no data
			Gomphidiaceae			42
				Brauniellula		2			no data
				Chroogomphus		22			no data
				Cystogomphus		1			no data
				Gomphidius		16			no data
				Gomphogaster		1			no data
			Gyroporaceae	Gyroporus		23			no data
			Hygrophoropsidaceae			27
				Hygrophoropsis		16			no data
				Leucogyrophana		11			no data
			Paxillaceae			97
				Alpova		15			no data
				Austrogaster		3			no data
				Gyrodon		12			no data
				Hoehnelogaster		1			no data
				Meiorganum		3			no data
				Melanogaster		21			no data
				Neoalpova		1			no data
				Paragyrodon		1			no data
				Paxillus		38			no data
				Pseudogyrodon		1			no data
				Rodwaya		1
			Protogastraceae	Protogaster		1			no data
			Rhizopogonaceae			223
				Fevansia		1			no data
				Rhizopogon		221			no data
				Rhopalogaster		1			no data
			Sclerodermataceae			83
				Chlorogaster		1			no data
				Favillea		2			no data
				Horakiella		1			no data
				Pirogaster		2			no data
				Pisolithus		13			no data
				Pompholyx		1			no data
				Sclerangium		1			no data
				Scleroderma		60			no data
				Veligaster		2			no data
			Sclerogastraceae	Sclerogaster		14			no data
			Serpulaceae			24
				Austropaxillus		9			no data
				Gymnopaxillus		4			no data
				Serpula		11
					Serpula lacrymans				sexual	Kauserud (2004)
			Suillaceae			121
				Boletinus		7			no data
				Fuscoboletinus		4			no data
				Gastrosuillus		4			no data
				Psiloboletinus		1			no data
				Suillus		103
					Suillus luteus				sexual	Fries & Sun (1992)
					Suillus granulatus				sexual	Fries & Sun (1992)
				Truncocolumella		2			no data
			Tapinellaceae			9
				Bondarcevomyces		1			no data
				Pseudomerulius		4			no data
				Tapinella		4			no data
			Not assigned			11
				Coniophoropsis		1			no data
				Corditubera		6			no data
				Corneromyces		2			no data
				Marthanella		1			no data
				Phaeoradulum		1			no data
		Cantharellales				750
			Aphelariaceae			21
				Aphelaria		19	no data		no data
				Phaeoaphelaria		1	no data		no data
				Tumidapexus		1	no data		no data
			Botryobasidiaceae			103
				Acladium		5	no data		no data
				Allescheriella		5			asexual	Gónzaleza et al. (2016)
					Allescheriella bathygena		multicellular	Das et al. (2006)
				Alysidium		4	no data		asexual	Gónzaleza et al. (2016)
				Botryobasidium		59	multicellular	Hannesch & Costa (2014)
					Botryobasidium candicans				sexual	Beltrán-Tejera et al. (2013)
				Botryohypochnus		1	no data		no data
				Haplotrichum		25	no data		asexual	Novas & Carmarán (2008)
				Suillosporium		4	no data		no data
			Cantharellaceae			219
				Afrocantharellus		4	multicellular	Chelela et al. (2015)	no data
				Cantharellus		162	multicellular	McLaughlin et al. (2009)	no data
					Cantharellus cibarius		multicellular	Khalili et al. (2014)
				Craterellus		33	multicellular	Dahlman et al. (2000)	no data
				Parastereopsis		1	no data		no data
				Pseudocraterellus		14	no data		no data
				Pterygellus		5	no data		no data
			Ceratobasidiaceae			82
				Cejpomyces		1	no data		no data
				Ceratobasidium		13	multicellular	Manici et al. (2014)	sexual	Kristiansen et al. (2004)
				Ceratoporia		1	no data		no data
				Ceratorhiza		6	no data		asexual	Sudheep & Sridhar (2012)
				Moniliopsis		3	no data		asexual	Sudheep & Sridhar (2012)
				Pellicularia		1	no data		no data
				Rhizoctonia		46	multicellular	Juarros et al. (1993)	asexual	Kristiansen et al. (2004)
				Scotomyces		1	no data		no data
				Thanatephorus		9	no data		sexual	Kristiansen et al. (2004)
				Tofispora		1	no data		no data
			Clavulinaceae			105
				Clavulicium		8	no data		no data
				Clavulina		81	no data		no data
				Membranomyces		1	no data		no data
				Multiclavula		15	no data		no data
			Hydnaceae			137	multicellular	Chatterjee et al. (2017)
				Burgoa		9			asexual	Kiyuna et al. (2015)
				Corallofungus		1			no data
				Cystidiodendron		7			no data
				Dentinum		1			no data
				Galziniella		1
				Gloeomucro		10			no data
				Hydnum		33			no data
				Ingoldiella		3
					Ingoldiella hamata				asexual	Fiuza et al. (2015)
				Osteomorpha		1			no data
				Paullicorticium		6			no data
				Repetobasidiellum		1
				Sistotrema		62			sexual	Kiyuna et al. (2015)
				Tyrodon		1
				Urnobasidium		1
			Tulasnellaceae			72
				Epulorhiza		6	no data		asexual	Sudheep & Sridhar (2012)
				Gloeotulasnella		5	no data		no data
				Pseudotulasnella		1	no data		no data
				Tulasnella		60	multicellular	Carvalho et al. (2018)	sexual	Pecoraro et al. (2012)
			Not assigned			11
				Burgella		2	no data		no data
				Burgellopsis		1	no data		no data
				Minimedusa		3	no data		no data
				Odontiochaete		1	no data		no data
				Radulochaete		2	no data		no data
				Schildia		1	no data		no data
				Stilbotulasnella		1	no data		no data
		Corticiales				248
			Corticiaceae			244
				Acantholichen		6	no data		no data
				Ambivina		1
				Amylobasidium		1
				Australovuilleminia		1
				Capillosclerotium		1
				Corticirama		2
				Corticium		75	multicellular	Feng et al. (2002)	sexual	Kwee et al. (1987)
				Cytidia		6	no data		no data
				Dendrocorticium		10	no data		no data
				Dendrodontia		4
				Dendrothele		61	no data		no data
				Erythricium		6
				Galzinia		9	no data		no data
				Kurtia		3
				Laeticorticium		1
				Laetisaria		4
				Lawreymyces		7	no data		no data
				Leptocorticium		8	no data		no data
				Licrostroma		1
				Limonomyces		2
				Marchandiomphalina		1
				Marchandiomyces		6	no data		asexual	Lawrey et al. (2008)
				Melzerodontia		3
				Mutatoderma		4
				Nothocorticium		1
				Papyrodiscus		1
				Punctularia		2
				Ripexicium		1
				Tretopileus		3
				Vuilleminia		11	no data		no data
				Waitea		2
			Not assigned	Dendrominia		4	no data		no data
		Geastrales	Geastraceae			115
				Geasteroides		1	no data		no data
				Geasteropsis		1	no data		no data
				Geastrum		97	no data		no data
				Myriostoma		1	no data		no data
				Nidulariopsis		2	no data		no data
				Phialastrum		1	no data		no data
				Radiigera		3	no data		no data
				Schenella		4	no data		no data
				Siropeltis		1	no data		no data
				Sphaerobolus		4	no data		no data
		Gloeophyllales				42	multicellular	Beacham et al. (2018)
			Gloeophyllaceae			40
				Boreostereum		4			sexual	Garcia-Sandoval et al. (2011)
				Campylomyces		2			no data
				Chaetodermella		1			no data
				Gloeophyllum		13
					Gloeophyllum trabeum				sexual	Goldstein & Gilertson (1981)
				Griseoporia		1			no data
				Hispidaedalea		1			no data
				Mycothele		1			no data
				Osmoporus		2			no data
				Phaeocoriolellus		1			no data
				Veluticeps		14			no data
			Not assigned	Pileodon		2			no data
		Gomphales				488
			Clavariadelphaceae			29
				Beenakia		7	no data		no data
				Clavariadelphus		22	multicellular	Gaso et al. (2007)	no data
			Gomphaceae			433
				Araeocoryne		1
				Ceratellopsis		21	no data		no data
				Delentaria		1
				Destuntzia		5	no data		no data
				Gautieria		29	no data		no data
				Gloeocantharellus		11	no data		no data
				Gomphus		15	no data		no data
				Phaeoclavulina		41	no data		no data
				Protogautieria		2	no data		no data
				Pseudogomphus		1
				Ramaria		296	multicellular	Zmitrovich et al. (2014)	no data
				Ramaricium		4	no data		no data
				Terenodon		1
				Turbinellus		5	no data		no data
			Lentariaceae			26
				Hydnocristella		2	no data		no data
				Kavinia		5	no data		no data
				Lentaria		19	no data		no data
		Hymenochaetales				1019
			Hymenochaetaceae			783
				Arambarria		1
				Asterodon		2
				Aurificaria		1
				Botryodontia		2
				Clavariachaete		2
				Coltricia		48			no data
					Coltricia perennis		multicellular	Forootanfar & Faramarzi (2015)
				Coltriciella		13			no data
				Coniferiporia		3
				Cyclomyces		2
				Deviodontia		1
				Dichochaete		2
				Erythromyces		1
				Fomitiporella		9
				Fomitiporia		40			sexual	Fischer (2002)
				Fulvifomes		25			no data
				Fuscoporella		2
				Fuscoporia		25			no data
				Hastodontia		2
				Hydnochaete		3
				Hymenochaete		158			sexual	Sharland et al. (1986)
					Hymenochaete rubiginosa		multicellular	Lachance (2011)
				Hymenochaetopsis		13
				Inocutis		9
				Inonotopsis		1
				Inonotus		117			sexual	Rajchenberg (2011)
					Inonotus obliquus		multicellular	Lee et al. (2007)
				Mensularia		3
				Mucronoporus		1
				Mucronoporus		1
				Ochroporus		1
				Onnia		8
				Phaeoporus		2
				Phellinidium		7
				Phellinopsis		9
				Phellinotus		2
				Phellinus		141	multicellular	Kumar (2015)
					Phellinus alni				sexual	Fischer (1996)
					Phellinus chrysoloma				sexual	Fischer (1996)
					Phellinus cinereus				sexual	Fischer (1996)
					Phellinus conchatus				sexual	Fischer (1996)
					Phellinus contiguus				sexual	Fischer (1996)
					Phellinus ferreus				sexual	Fischer (1996)
					Phellinus ferruginosw				sexual	Fischer (1996)
					Phellinus igniarius				sexual	Fischer (1996)
					Phellinus laevigatus				sexual	Fischer (1996)
					Phellinus lundellii				sexual	Fischer (1996)
					Phellinus nigricans				sexual	Fischer (1996)
					Phellinus pini				sexual	Fischer (1996)
					Phellinus populicola				sexual	Fischer (1996)
					Phellinus punctafus				sexual	Fischer (1996)
					Phellinus tremulae				sexual	Fischer (1996)
					Phellinus tuberculosus				sexual	Fischer (1996)
					Phellinus torulosus				sexual	Fischer (1996)
					Phellinus viticola				sexual	Fischer (1996)
					Phellinus vorax				sexual	Fischer (1996)
				Phellopilus		1
				Phylloporia		42			sexual	Rajchenberg (2011)
					Phylloporia ribis		multicellular	Zhao et al. (2018)
				Polystictus		3
				Porodaedalea		8
				Pseudoinonotus		6
				Pyrrhoderma		2
				Sanghuangporus		12
				Tropicoporus		10
				Tubulicrinis		40			no data
				Xanthochrous		1
				Xanthoporia		1
			Neoantrodiellaceae	Neoantrodiella		2	no data		no data
			Repetobasidiaceae			27
				Muscinupta		1	no data		no data
				Repetobasidium		12	no data		no data
				Rickenella		10	no data		no data
				Sidera		4	no data		no data
			Schizoporaceae			147
				Alutaceodontia		1
				Chaetoporellus		1
				Echinoporia		3	no data		no data
				Fibrodontia		5	no data		no data
				Hyphodontia		35	no data		sexual	Wu (2001)
				Kneiffiella		23	no data		no data
				Lagarobasidium		5	no data		no data
				Leucophellinus		2	no data		no data
				Odontiopsis		2	no data		no data
				Palifer		8	no data		no data
				Paratrichaptum		1
				Poriodontia		1
				Schizopora		2	no data		no data
				Xylodon		58	no data
					Xylodon flaviporus				sexual	Chen et al. (2018)
			Not assigned			60
				Atheloderma		2	no data		no data
				Caeruleomyces		1	no data		no data
				Cyanotrama		1	no data		no data
				Cylindrosporus		1	no data		no data
				Fibricium		6	no data		no data
				Ginnsia		1	no data		no data
				Hirschioporus		3	no data		no data
				Lawrynomyces		1
				Neomensularia		4	no data		no data
				Physodontia		1
				Sphagnomphalia		1
				Subulicium		3	no data		no data
				Trichaptum		34			no data
					Trichaptum abietinum		multicellular	Ko & Jung (2002)
					Trichaptum biforme		multicellular	Bal et al. (2017)
				Tsugacorticium		1
		Hysterangiales				145
			Gallaceaceae			16
				Austrogautieria		7	no data		no data
				Gallacea		6	no data		no data
				Hallingea		3	no data		no data
			Hysterangiaceae			73
				Aroramyces		4	no data		no data
				Boninogaster		1	no data		no data
				Circulocolumella		1	no data		no data
				Clathrogaster		1	no data		no data
				Hysterangium		66	no data		no data
			Mesophelliaceae			36
				Andebbia		1	no data		no data
				Castoreum		2	no data		no data
				Chondrogaster		2	no data		no data
				Gummiglobus		2	no data		no data
				Gummivena		1	no data		no data
				Malajczukia		8	no data		no data
				Mesophellia		18	no data		no data
				Nothocastoreum		1	no data		no data
				Potoromyces		1	no data		no data
			Phallogastraceae			14
				Phallogaster		3	no data		no data
				Protubera		11	no data		no data
			Trappeaceae			6
				Phallobata		1	no data		no data
				Restingomyces		1	no data		no data
				Trappea		4	no data		no data
		Jaapiales	Jaapiaceae	Jaapia		2	no data		no data
		Lepidostromatales	Not assigned	Lepidostroma		5	no data		no data
		Phallales				172
			Claustulaceae			11
				Claustula		1	no data		no data
				Gelopellis		6	no data		no data
				Kjeldsenia		1	no data		no data
				Phlebogaster		2	no data		no data
				Pseudogelopellis		1	no data		no data
			Phallaceae			159	multicellular	Patel et al. (2018)
				Abrachium		1
				Alboffiella		1
				Anthurus		4			no data
				Aporophallus		1
				Aseroë		3
				Blumenavia		3
				Calvarula		1
				Clathrus		14			no data
				Colus		7			no data
				Echinophallus		1
				Endoclathrus		1
				Endophallus		1
				Ileodictyon		3			no data
				Itajahya		3
				Ithyphallus		3
				Jansia		2
				Kalchbrennera		2
				Kobayasia		2
				Laternea		7			no data
				Ligiella		1
				Linderia		1
				Lysurus		18			no data
				Mutinus		27			no data
				Neolysurus		1
				Omphalophallus		2
				Phallus		36			no data
				Protuberella		1
				Pseudoclathrus		4			no data
				Pseudocolus		5			no data
				Staheliomyces		1
				Staurophallus		1
				Stephanophallus		1
			Not assigned			2
				Saprogaster		1	no data		no data
				Vandasia		1	no data		no data
		Polyporales				3552	multicellular	Cai et al. (2017)
			Cystostereaceae			18
				Cericium		1			no data
				Crustomyces		3			no data
				Cystidiodontia		3			no data
				Cystostereum		7			no data
				Parvobasidium		2			no data
				Parvodontia		2			no data
			Fomitopsidaceae			430
				Amylocystis		2
				Anomoloma		6
				Anomoporia		7
				Antrodia		52			sexual	Chiu（2006）
				Antrodiopsis		73
				Auriporia		4
				Brunneoporus		5
				Buglossoporus		11
				Cartilosoma		1
				Climacocystis		2
				Coriolellus		1
				Dacryobolus		5
				Daedalea		37			sexual	Rajchenberg (2011)
				Dentiporus		1
				Donkioporia		2
				Flavidoporia		3
				Fomitella		2
				Fomitopsis		36			sexual	Rajchenberg (2011)
				Fragifomes		1
				Gilbertsonia		1
				Gloeocystidium		2
				Ischnoderma		9
				Laetiporus		16
				Lasiochlaena		1
				Lentoporia		1
				Neolentiporus		13
				Neolentiporus		1
				Niveoporofomes		1
				Oligoporus		13
				Osteina		1
				Parmastomyces		7
				Phaeodaedalea		1
				Phaeolus		6
				Pilatoporus		2
				Piptoporellus		3
				Piptoporus		1
				Postia		57			sexual	Rajchenberg (2011)
				Pseudofibroporia		1
				Ptychogaster		9
				Pycnoporellus		2
				Resinoporia		11
				Rhizoporia		1
				Rhodofomes		5
				Rhodofomitopsis		4
				Rubellofomes		2
				Spelaeomyces		1
				Spongiporus		2
				Sporotrichum		73			asexual	Krisher et al. (1995)
				Subantrodia		2
				Ungulifomes		1
				Xylostroma		1
			Fragiliporiaceae	Fragiliporia		1			no data
			Ganodermataceae			300
				Amauroderma		76			no data
				Elfvingia		3			no data
				Ganoderma		211			sexual	Miller et al. (2000)
				Haddowia		3			no data
				Humphreya		4			no data
				Polyporopsis		1			no data
				Tomophagus		1			no data
				Trachyderma		1			no data
			Lepidostromataceae			2
				Ertzia		1			no data
				Sulzbacheromyces		1			no data
			Limnoperdaceae	Limnoperdon		1			no data
			Meripilaceae			73
				Grifola		9			no data
				Henningsia		5			no data
				Hydnopolyporus		2			no data
				Meripilus		6			no data
				Physisporinus		3			no data
				Pseudonadsoniella		1·			asexual	Kondratyuk et al. (2015)
				Rigidoporus		48			no data
			Meruliaceae			645
				Abortiporus		3
				Aegerita		10
				Aegeritopsis		1
				Amaurohydnum		1
				Amauromyces		1
				Aquascypha		1
				Atheliachaete		3
				Aurantiopileus		3
				Bjerkandera		7
				Bulbillomyces		1
				Cabalodontia		5
				Caudicicola		1
				Cerocorticium		7
				Chaetoporus		1
				Chrysoderma		1
				Cladoderris		1
				Columnodontia		1
				Conohypha		2
				Coralloderma		3
				Crustoderma		18			no data
				Cyanodontia		1
				Cymatoderma		14
				Dendrophlebia		1
				Diacanthodes		3
				Flaviporus		10
				Flavodon		2
				Gelatoporia		2
				Gloeoporus		32			sexual	Rajchenberg (2011)
				Gyrophanopsis		2
				Heteroporus		4
				Hydnophlebia		2
				Hyphoderma		104			sexual	Wu (1997)
				Hyphodontiastra		1
				Hypochnicium		35			no data
				Irpex		46			no data
				Jacksonomyces		1
				Junghuhnia		31			no data
				Kneiffia		1
				Lamelloporus		1
				Lilaceophlebia		3
				Loweomyces		6
				Luteoporia		1
				Lyomyces		15
				Merulius		1
				Metulodontia		2
				Metuloidea		5
				Mycoacia		17			no data
				Mycoaciella		5
				Mycoleptodonoides		6
				Mycorrhaphium		6
				Mycorrhaphoides		1
				Phlebia		89
					Phlebia brevispora				sexual	Nakasone & Eslyn (1981)
				Phlebiporia		1
				Pirex		1
				Podoscypha		39			no data
				Radulodon		11
				Sarcodontia		6
				Scopuloides		5
				Spathulina		1
				Steccherinum		55			no data
				Stegiacantha		1
				Uncobasidium		2
				Xanthoporus		2
			Phanerochaetaceae			367
				Amethicium		1
				Antrodiella		50			no data
				Australicium		2
				Australohydnum		1
				Byssomerulius		9			no data
				Candelabrochaete		12			no data
				Ceriporia		57			no data
				Ceriporiopsis		41			no data
				Climacodon		7
				Cordochaete		1
				Efibula		16			no data
				Geliporus		1
				Hjortstamia		10			no data
				Hyphodermella		6
				Inflatostereum		2
				Meruliopsis		2
				Niemelaea		3
				Oxychaete		1
				Phanerina		1
				Phanerochaete		91			sexual	Tananuvat et al. (2012)
				Phanerodontia		4
				Phaneroites		1
				Phlebiopsis		19			no data
				Porostereum		4
				Porpomyces		1
				Pouzaroporia		1
				Pseudolagarobasidium		9
				Rhizochaete		12			no data
				Roseograndinia		1
				Terana		1
			Polyporaceae			1621
				Abundisporus		7
				Amyloporia		5
				Amyloporiella		1
				Aurantiporus		5
				Australoporus		1
				Austrolentinus		1
				Bresadolia		4
				Cellulariella		2
				Cerioporus		11
				Cerrena		7
				Cinereomyces		2
				Colospora		2
				Coriolopsis		20
				Coriolus		3
				Cryptomphalina		1
				Cryptoporus		2
				Daedaleopsis		10
				Datronia		8
				Datroniella		6
				Dentocorticium		6
				Dichomitus		23
				Diplomitoporus		19
				Earliella		1
				Echinochaete		5
				Epithele		23
				Epithelopsis		2
				Erastia		1
				Faerberia		1
				Favolus		25
				Fibroporia		9
				Flabellophora		19
				Flammeopellis		1
				Fomes		59
					Fomes cajanderi				sexual	Neuhauser & Gilbertson (1971)
					Fomes roseus				sexual	Mounce & Macrae (1937)
					Fomes subroseus				sexual	Mounce & Macrae (1937)
					Fomes pinicola				sexual	Mounce & Macrae (1938)
				Funalia		8			sexual	Rajchenberg (2011)
				Fuscocerrena		1
				Globifomes		1
				Grammothele		21
				Grammothelopsis		7
				Hapalopilus		18
				Haploporus		9
				Heliocybe		1
				Hexagonia		41			no data
				Hymenogramme		1
				Laccocephalum		5
				Laetifomes		1
				Leifiporia		2
				Leiotrametes		2
				Lentinus		123			no data
				Lenzites		26			no data
				Leptoporus		12
				Lignosus		8
				Lloydella		3
				Lopharia		13
				Loweporus		8
				Macrohyporia		3
				Megasporia		10
				Megasporoporia		4
				Megasporoporiella		5
				Melanoderma		2
				Melanoporella		1
				Melanoporia		1
				Microporellus		23
				Microporus		12
				Mollicarpus		1
				Mycobonia		1
				Myriothele		1
				Navisporus		6
				Neodatronia		2
				Neofavolus		4
				Neofomitella		3
				Neolentinus		9
				Nigrofomes		2
				Nigroporus		6
				Pachykytospora		4
				Panus		43			no data
				Perenniporia		106			no data
				Perenniporiella		5
				Phaeotrametes		1
				Physisporus		2
				Picipes		14
				Piloporia		2
				Pleuropus		1
				Pocillaria		1
				Podofomes		3
				Polyporus		259			no data
				Poria		19
				Porogramme		7
				Poronidulus		2
				Pseudofavolus		6
				Pseudopiptoporus		2
				Pycnoporus		4
				Pyrofomes		7
				Rhodonia		1
				Riopa		2
				Roseofavolus		1
				Royoporus		1
				Rubroporus		2
				Ryvardenia		2
				Sarcoporia		2
				Skeletocutis		43			sexual	Rajchenberg (2011)
				Sparsitubus		1
				Spongipellis		10
				Stiptophyllum		1
				Theleporus		8
				Tinctoporellus		4
				Trametella		1
				Trametes		191			sexual	Tomšovský & Homolka (2004)
				Trametopsis		3
				Truncospora		10
				Tyromyces		120			sexual	Rajchenberg (2011)
				Vanderbylia		7
				Wolfiporia		7
				Xerotus		16
				Yuchengia		1
			Sparassidaceae			10
				Sparassiella		1			no data
				Sparassis		9
					Sparassis radicata				sexual	Dai et al. (2006)
			Steccherinaceae			14
				Antella		3			no data
				Austeria		1			no data
				Butyrea		2			no data
				Citripora		2			no data
				Trulla		6			no data
			Xenasmataceae			28
				Xenasma		11			no data
				Xenasmatella		13			no data
				Xenosperma		4			no data
			Not assigned			42
				Anthoporia		1
				Bourdotiella		1			no data
				Cerarioporia		1
				Crustodontia		1			no data
				Crystallocystidium		12			no data
				Donkioporiella		1
				Globosomyces		1			no data
				Globuliciopsis		2			no data
				Irpicochaete		1			no data
				Meruliophana		1
				Nigrohydnum		1
				Obba		2			no data
				Phaeophlebiopsis		3			no data
				Phlebiella		9			no data
				Repetobasidiopsis		1
				Rickiopora		1
				Sebipora		1
				Taiwanofungus		2			no data
		Russulales				3137	multicellular	Zhou & Dai (2013)
			Albatrellaceae			63
				Albatrellopsis		1			no data
				Albatrellus		22			no data
				Caloporus		1			no data
				Jahnoporus		4			no data
				Leucogaster		23			no data
				Leucophleps		3			no data
				Mycolevis		1			no data
				Polyporoletus		4			no data
				Scutiger		4			no data
					Scutiger coleoptrata				asexual	Rosenberg et al. (2004)
			Amylostereaceae	Amylostereum		5			no data
			Auriscalpiaceae			79
				Amylonotus		4			no data
				Artomyces		17			no data
				Auriscalpium		9			no data
				Clavicorona		8			no data
				Dentipratulum		3			no data
				Lentinellus		35			no data
				Pleurodon		2			no data
				Stalpersia		1			no data
			Bondarzewiaceae			84
				Amylaria		1			no data
				Amylosporus		11			no data
				Bondarzewia		12			no data
				Gloiodon		4			no data
				Heterobasidion		15			sexual	Rajchenberg (2011)
				Rigidoporopsis		3			no data
				Sclerodon		1			no data
				Spiniger		1			no data
				Stecchericium		6			no data
				Wrightoporia		30			sexual	Rajchenberg (2011)
			Echinodontiaceae			7
				Echinodontium		5			no data
				Laurilia		2			no data
			Gloeodontiaceae	Gloeodontia		8			no data
			Hericiaceae			28
				Dentipellicula		3			no data
				Dentipellis		7			no data
				Dryodon		1			no data
				Hericium		14			no data
				Laxitextum		3			no data
			Hybogasteraceae	Hybogaster		1			no data
			Lachnocladiaceae			205
				Asterostroma		25			no data
				Asterostromella		17			no data
				Dichantharellus		2			no data
				Dichopleuropus		1			no data
				Dichostereum		13			no data
				Lachnocladium		40			no data
				Scytinostroma		33			no data
				Stelligera		1			no data
				Stereofomes		4			no data
				Vararia		69			no data
			Peniophoraceae			216
				Amylofungus		2			no data
				Dendrophora		1			no data
				Duportella		14			no data
				Entomocorticium		1			no data
				Gloeocystidiopsis		2			no data
				Gloeopeniophora		2			no data
				Gloiothele		12			no data
				Peniophora		180			no data
				Sterellum		1			no data
				Vesiculomyces		1			no data
			Russulaceae			2056
				Arcangeliella		19			no data
				Boidinia		14			no data
				Cystangium		35			no data
				Elasmomyces		4
				Gymnomyces		55			no data
				Lactarius		583			no data
				Lactifluus		156			no data
				Macowanites		35			no data
				Martellia		3
				Multifurca		6			no data
				Pleurogala		1
				Pseudoxenasma		1
				Russula		1120			no data
				Russulina		1
				Zelleromyces		23			no data
			Stephanosporaceae			48
				Athelidium		2			no data
				Cristinia		12			no data
				Cyanobasidium		2			no data
				Lindtneria		10			no data
				Mayamontana		1			no data
				Mycolindtneria		4			no data
				Stephanospora		16			no data
				Sulphurina		1			no data
			Stereaceae			295
				Acanthobasidium		6			no data
				Acanthofungus		2
				Acanthophysellum		7			no data
				Acanthophysium		4			no data
				Aleurocystis		4			no data
				Aleurodiscus		91
					Aleurodiscus canadensis				sexual	Whitehouse (1949)
				Aleuromyces		1
				Amylohyphus		1
				Amylosporomyces		2
				Chaetoderma		1
				Conferticium		3			no data
				Coniophorafomes		2
				Gloeocystidiellum		33			no data
				Gloeomyces		3
				Matula		2
				Megalocystidium		7			no data
				Neoaleurodiscus		2
				Scotoderma		1
				Stereum		115
					Stereum gausapatum				sexual	Herrick (1939)
					Stereum sanguinolentum				sexual	Thomsen & Koch (1999)
				Xylobolus		8			no data
			Not assigned			42
				Aleurocystidiellum		2			no data
				Dentipellopsis		1			no data
				Gloeoasterostroma		1
				Gloeohypochnicium		2			no data
				Gloeopeniophorella		4			no data
				Haloaleurodiscus		1
				Laeticutis		1
				Larssoniporia		1
				Neoalbatrellus		3			no data
				Polypus		1
				Pseudowrightoporia		10			no data
				Scopulodontia		3			no data
				Scytinostromella		5			no data
				Wrightoporiopsis		5			no data
				Xeroceps		2			no data
		Sebacinales				93
			Sebacinaceae			93
				Craterocolla		3	no data		no data
				Cristella		3	no data		no data
				Ditangium		1	no data		no data
				Efibulobasidium		1	no data		no data
				Globulisebacina		1	no data		no data
				Helvellosebacina		2	no data		no data
				Paulisebacina		1	no data		no data
				Poroidea		1
				Sebacina		65	no data		sexual	Wright et al. (2010)
				Tremellodendron		11	no data		no data
				Tremelloscypha		4	no data		no data
		Stereopsidales	Stereopsidaceae	Stereopsis		17	no data		no data
		Thelephorales				356
			Bankeraceae			130
				Bankera		4	multicellular	Zmitrovich et al. (2014)	no data
				Boletopsis		7	no data		no data
				Corneroporus		1	no data		no data
				Hydnellum		40	multicellular	Zmitrovich et al. (2014)	no data
				Phellodon		21			no data
					Phellodon niger		multicellular	Fang et al. (2010)
				Sarcodon		57	multicellular	Phan et al. (2015)	no data
			Thelephoraceae			224
				Amaurodon		10	no data		no data
				Hypochnus		3	no data		no data
				Lenzitopsis		1	no data		no data
				Odontia		5	no data		no data
				Parahaplotrichum		1	no data		no data
				Polyozellus		1
				Pseudotomentella		17	no data		no data
				Skepperia		4	no data		no data
				Thelephora		52			no data
					Thelephora aurantiotincta		multicellular	Liu et al. (2004)
					Thelephora ganbajun		multicellular	Liu et al. (2004)
					Thelephora terrestris		multicellular	Slekovec & Irgolic (1996)
					Thelephora vialis		multicellular	Xie et al. (2005)
				Tomentella		121	no data		no data
				Tomentellastrum		1
				Tomentellopsis		8	no data		no data
			Not assigned			2
				Bubacia		1	no data		no data
				Thelephorella		1	no data		no data
		Trechisporales	Hydnodontaceae			114	no data
				Boidinella		2
				Brevicellicium		12	no data		no data
				Cristelloporia		5	no data		no data
				Dextrinocystis		2
				Dextrinodontia		1
				Fibriciellum		1
				Fibuloporia		3	no data		no data
				Hydnodon		1
				Litschauerella		4	no data		no data
				Luellia		3	no data		no data
				Sistotremastrum		6	no data		no data
				Sistotremella		3	no data		no data
				Sphaerobasidium		3
				Subulicystidium		9	no data		no data
				Trechispora		51	multicellular	Korpelainen et al. (2016)	no data
				Tubulicium		8	no data		no data
		Tremellodendropsidales	Tremellodendropsidaceae	Tremellodendropsis		7	no data		no data
		Not assigned	Not assigned			308
				Akenomyces		1
				Aldridgea		1
				Alloclavaria		1
				Anixia		1
				Arthrodochium		1
				Arualis		1
				Atraporiella		1
				Blasiphalia		1
				Bridgeoporus		1
				Cenangiomyces		1
				Ceraceopsis		1
				Contumyces		3
				Cora		89	no data		no data
				Corella		1
				Corticomyces		1
				Cotylidia		12	no data		no data
				Cruciger		1
				Cyphellostereum		6	multicellular	Vargas et al. (2014)	no data
				Dendrosporomyces		2
				Dictyonema		30	multicellular	Lücking et al. (2013)	no data
				Ellula		1
				Fibulochlamys		2
				Fibulocoela		1
				Fibulotaeniella		1
				Geotrichopsis		1
				Gloeosynnema		2
				Glomerulomyces		1
				Glutinoagger		1
				Grandinia		6	no data		no data
				Hypolyssus		1
				Intextomyces		4
				Korupella		1
				Loreleia		3
				Minostroscyta		1
				Mylittopsis		1
				Myriococcum		2
				Odonticium		10	no data		no data
				Oxyporus		34	no data		no data
				Pagidospora		1
				Peniophorella		27	no data		no data
				Phlyctibasidium		1
				Pseudasterodon		12	no data		no data
				Pycnovellomyces		1
				Resinicium		16	no data		no data
				Riessia		5
				Riessiella		2
				Skvortzovia		1
				Taiwanoporia		2
				Timgrovea		2
				Titaeella		1
				Trechinothus		1
				Tricladiomyces		1
				Trimitiella		1
				Tubulicrinopsis		4
				Xenosoma		1
	Agaricostilbomycetes					80
		Agaricostilbales				66	multicellular	Bauer et al. (2009)
			Agaricostilbaceae			17
				Agaricostilbum		1			sexual	Boekhout et al. (2011)
				Amerobotryum		1			no data
				Bensingtonia		6			asexual	Boekhout et al. (2011)
				Pseudobensingtonia		2			no data
				Sterigmatomyces		7			asexual	Boekhout et al. (2011)
			Chionosphaeraceae			27
				Chionosphaera		6			sexual	Boekhout et al. (2011)
				Kurtzmanomyces		4			asexual	Boekhout et al. (2011)
				Stilbum		17			sexual	Boekhout et al. (2011)
			Kondoaceae	Kondoa		9			sexual	Boekhout et al. (2011)
			Ruineniaceae	Ruinenia		5			no data
			Not assigned			8
				Jianyunia		1			no data
				Mycogloea		7			sexual	Boekhout et al. (2011)
		Spiculogloeales	Spiculogloeaceae			11
				Phyllozyma		7	no data		no data
				Spiculogloea		4	unicellular	Kurtzman & Boekhout (2017)	sexual	Boekhout et al. (2011)
		Not assigned	Not assigned	Cystobasidiopsis		3	no data		no data
	Atractiellomycetes	Atractiellales				51
			Atractogloeaceae	Atractogloea		1	no data		no data
			Mycogelidiaceae	Mycogelidium		1	no data		no data
			Phleogenaceae			44
				Atractiella		7	no data		sexual	Kottke et al. (2009)
				Basidiopycnis		1	no data
				Botryochaete		3	no data		no data
				Helicogloea		26	no data		sexual	Kottke et al. (2009)
				Hoehnelomyces		1	no data		no data
				Phleogena		3	no data		sexual	Kottke et al. (2009)
				Proceropycnis		1	no data		asexual	Kottke et al. (2009)
				Saccoblastia		2	no data		sexual	Kottke et al. (2009)
			Saccoblastiaceae	Infundibura		1	no data		asexual	Kottke et al. (2009)
			Not assigned			4
				Hobsonia		3	no data		asexual	Kottke et al. (2009)
				Leucogloea		1	no data		asexual	Kottke et al. (2009)
	Classiculomycetes	Classiculales	Classiculaceae			2	multicellular	Wang et al. (2015b)
				Classicula		1			sexual	Bauer et al. (2003)
				Jaculispora		1			asexual	Duarte (2013)
	Cryptomycocolacomycetes	Cryptomycocolacales	Cryptomycocolacaceae			2	multicellular	Oberwinkler (2017)
				Colacosiphon		1			no data
				Cryptomycocolax		1			no data
	Cystobasidiomycetes					56
		Cyphobasidiales	Cyphobasidiaceae	Cyphobasidium		2	multicellular	Oberwinkler (2017)	sexual	Millanes et al. (2016)
		Cystobasidiales	Cystobasidiaceae			22
				Cystobasidium		17	multicellular	Boekhout et al. (2011)	sexual	Boekhout et al. (2011)
				Occultifur		5	multicellular	Millanes et al. (2016)	sexual	Boekhout et al. (2011)
		Erythrobasidiales				9
			Erythrobasidiaceae	Erythrobasidium		4	multicellular	Prillinger & Lopandic (2015)	asexual	Boekhout et al. (2011)
			Not assigned			5
				Bannoa		4	unicellular	Hamamoto (2010)	asexual	Boekhout et al. (2011)
				Hasegawazyma		1	no data		no data
		Naohideales	Naohideaceae	Naohidea		1	no data		sexual	Boekhout et al. (2011)
		Not assigned				22
			Buckleyzymaceae	Buckleyzyma		5	no data		no data
			Microsporomycetaceae	Microsporomyces		5	no data		no data
			Symmetrosporaceae	Symmetrospora		6	no data		no data
			Not assigned			6
				Cyrenella		1	multicellular	Sampaio (2004)	asexual	Boekhout et al. (2011)
				Sakaguchia		5	no data		sexual	Boekhout et al. (2011)
	Dacrymycetes					172
		Dacrymycetales	Dacrymycetaceae			171
				Arrhytidia		3	no data		no data
				Calocera		24	no data
					Calocera cornea				sexual	Whitehouse (1949)
				Cerinomyces		13	no data		no data
				Cerinosterus		1
				Dacrymyces		70	no data
					Dacrymyces pinacearum				asexual	Shirouzu et al. (2012)
				Dacryomitra		6	no data		no data
				Dacryonaema		1
				Dacryopinax		22	no data		no data
				Dacryoscyphus		3
				Ditiola		10	no data
					Ditiola peziziformis				sexual	Kolarík et al. (2006)
				Femsjonia		6	no data		no data
				Guepiniopsis		9	no data		no data
				Heterotextus		3	no data		no data
		Unilacrymales	Unilacrymaceae	Unilacryma		1	no data		no data
	Entorrhizomycetes					17
		Entorrhizales	Entorrhizaceae	Entorrhiza		16	no data		no data
		Talbotiomycetales	Talbotiomycetaceae	Talbotiomyces		1	no data		no data
	Exobasidiomycetes					829
		Ceraceosorales	Ceraceosoraceae	Ceraceosorus		3	multicellular	Kijpornyongpan & Aime (2016)	no data
		Doassansiales				55
			Doassansiaceae			52
				Burrillia		8	no data		no data
				Doassansia		22	no data		no data
				Doassinga		1	no data		no data
				Entylomaster		2	no data		no data
				Heterodoassansia		9	no data		no data
				Nannfeldtiomyces		2	no data		no data
				Narasimhania		1	no data		no data
				Pseudodermatosorus		2	no data		no data
				Pseudodoassansia		2	no data		no data
				Pseudotracya		1
				Tracya		2	no data		no data
			Melaniellaceae	Melaniella		2	no data		no data
			Rhamphosporaceae	Rhamphospora		1	no data		no data
		Entylomatales	Entylomataceae			273
				Entyloma		252	no data		sexual	Nasr et al. (2014)
				Entylomella		21	no data		asexual	Sun et al. (2017)
		Exobasidiales				166	multicellular	Begerow et al. (2006)
			Brachybasidiaceae			15
				Brachybasidium		1			no data
				Dicellomyces		3			no data
				Kordyana		9			no data
				Lelum		1			no data
				Proliferobasidium		1			no data
			Cryptobasidiaceae			14
				Botryoconis		2			no data
				Clinoconidium		4			no data
				Coniodictyum		2			no data
				Cryptobasidium		1			no data
				Drepanoconis		5			no data
			Exobasidiaceae			122
				Austrobasidium		1			no data
				Endobasidium		1			no data
				Exobasidium		115	multicellular	Brewer et al. (2014)	no data
				Laurobasidium		1			no data
				Muribasidiospora		4			no data
			Graphiolaceae			12
				Graphiola		11			no data
				Stylina		1			no data
			Not assigned			3
				Cladosterigma		2			no data
				Phacellula		1			no data
		Georgefischeriales				44	multicellular	Begerow et al. (2006)
			Eballistraceae	Eballistra		4			no data
			Georgefischeriaceae			22
				Georgefischeria		4			no data
				Jamesdicksonia		18			no data
			Gjaerumiaceae	Gjaerumia		5			no data
			Tilletiariaceae			13
				Phragmotaenium		5			no data
				Tilletiaria		1			sexual	Boekhout et al. (2011)
				Tolyposporella		7			no data
		Microstromatales				44
			Microstromataceae			27
				Helostroma		1	no data		no data
				Leptophyma		4	no data		no data
				Microstroma		19	multicellular	Mahdi et al. (2008)	no data
				Sympodiomycopsis		3	unicellular	Deák & Péter (2013)	asexual	Boekhout et al. (2011)
			Quambalariaceae	Quambalaria		6	multicellular	Mahdi et al. (2008)	asexual	Boekhout et al. (2011)
			Volvocisporiaceae	Volvocisporium		2	multicellular	Mahdi et al. (2008)	no data
			Not assigned			9
				Jaminaea		3			asexual	Buzzini et al. (2017)
					Jaminaea angkorensis		multicellular	Hegedusova et al. (2014)
				Parajaminaea		2	no data		no data
				Pseudomicrostroma		4	no data		no data
		Robbauerales	Robbaueraceae	Robbauera		1	no data		no data
		Tilletiales				236
			Erratomycetaceae	Erratomyces		5	no data		no data
			Tilletiaceae			231	unicellular	Ingold (1989)
				Conidiosporomyces		3			no data
				Ingoldiomyces		1			no data
				Neovossia		4			no data
				Oberwinkleria		1			no data
				Salmacisia		1			no data
				Tilletia		221
					Tilletia aegopogonis				sexual	Durán (1980)
					Tilletia indica				sexual	Garrett & Bowden (2002)
		Not assigned	Not assigned			7
				Acaromyces		1	no data		asexual	Boekhout et al. (2011)
				Meira		4	no data		asexual	Boekhout et al. (2011)
				Tilletiopsis		2	multicellular	Singh et al.(2010)	asexual	Nasr et al. (2014)
	Geminibasidiomycetes	Geminibasidiales	Geminibasidiaceae			5
				Basidioascus		3	no data		no data
				Geminibasidium		2	no data		no data
	Malasseziomycetes	Malasseziales	Malasseziaceae			22
				Malassezia		21	multicellular	Rhie et al. (2000)	asexual	Boekhout et al. (2011)
				Pityrosporum		1	multicellular	Abbe et al. (1981)	no data
	Microbotryomycetes					326
		Heterogastridiales	Heterogastridiaceae			17
				Colacogloea		13	multicellular	Oberwinkler et al. (1990)
									sexual	Boekhout et al.(2011)
				Heterogastridium	Heterogastridium pycnidioideum	1	no data		sexual	Nakagiri & Ito (1991)
				Hyalopycnis		1	no data		no data
				Krieglsteinera		1	no data		no data
				Pycnopulvinus		1	no data		no data
		Kriegeriales	Kriegeriaceae			6
				Meredithblackwellia		1	no data		no data
				Phenoliferia		4	no data		no data
				Yamadamyces		1	no data		no data
		Leucosporidiales	Leucosporidiaceae			9	multicellular	Yurkov et al. (2012)
				Leucosporidiella		3			asexual	Boekhout et al. (2011)
				Leucosporidium		5			sexual	Boekhout et al. (2011)
				Mastigobasidium		1			sexual	Boekhout et al. (2011)
		Microbotryales				164	multicellular	Begerow et al. (1997)
			Microbotryaceae			152
				Bauerago		9			sexual	Boekhout et al. (2011)
				Bauhinus		1			no data
				Microbotryum		99			sexual	Boekhout et al. (2011)
				Sphacelotheca		42			sexual	Boekhout et al. (2011)
				Zundeliomyces		1			sexual	Boekhout et al. (2011)
			Ustilentylomataceae			12
				Aurantiosporium		5			sexual	Boekhout et al. (2011)
				Fulvisporium		1			sexual	Boekhout et al. (2011)
				Microbotryozyma		1			no data
				Ustilentyloma		5			sexual	Boekhout et al. (2011)
		Sporidiobolales				91
			Sporidiobolaceae			17
				Aessosporon		2	unicellular	Walt (1970)	no data
				Rhodosporidiobolus		9			no data
					Rhodosporidiobolus fluvialis		unicellular	Poontawee et al. (2018)
				Rogersiomyces		2	no data		no data
				Sporidiobolus		4	no data		sexual	Boekhout et al. (2011)
			Not assigned			74
				Ballistosporomyces		5	unicellular	Nakase et al. (1989)	asexual	Boekhout et al. (1992)
				Rhodotorula		43	unicellular	Li et al. (2016)	asexual	Boekhout et al. (2011)
				Sporobolomyces		26	unicellular	Li et al. (2016)	asexual	Boekhout et al. (2011)
		Not assigned				39
			Chrysozymaceae			9
				Bannozyma		2	no data		no data
				Chrysozyma		2	no data		no data
				Fellozyma		1	no data		no data
				Hamamotoa		4	no data		no data
			Not assigned			30
				Atractocolax		1	no data		no data
				Camptobasidium		1	multicellular	Swann et al. (2001)	asexual	Boekhout et al. (2011)
				Crucella		1	multicellular	Marvanova & Suberkropp (1990)	no data
				Curvibasidium		3	multicellular	Boekhout et al. (2011)	sexual	Boekhout et al. (2011)
				Glaciozyma		4			no data
					Glaciozyma antarctica		unicellular	Hashim et al. (2013)
					Glaciozyma litorale		unicellular	Kachalkin et al. (2014)
					Glaciozyma martinii		unicellular	Turchetti et al. (2011)
					Glaciozyma watsonii		unicellular	Turchetti et al. (2011)
				Libkindia		1
				Oberwinklerozyma		3	no data		no data
				Pseudohyphozyma		3	no data		no data
				Sampaiozyma		2	no data		no data
				Slooffia		4	no data		no data
				Spencerozyma		1
				Trigonosporomyces		1
				Udeniozyma		1
				Vonarxula		1
				Yunzhangia		2	no data		no data
				Yurkovia		1
	Mixiomycetes	Mixiales	Mixiaceae	Mixia		1	unicellular	Aime et al. (2006)	sexual	Deák & Péter (2013)
	Pucciniomycetes					8372
		Helicobasidiales	Helicobasidiaceae			36
				Helicobasidium		13			no data
					Helicobasidium monpa		multicellular	Aimi et al. (2002)
				Stypinella		1	no data		no data
				Tuberculina		22	no data		asexual	Lutz et al. (2004)
		Pachnocybales	Pachnocybaceae	Pachnocybe		4	no data		no data
		Platygloeales				69
			Eocronartiaceae			12
				Eocronartium		1	no data		no data
				Herpobasidium		4	no data		no data
				Jola		4	no data		no data
				Platycarpa		2	no data		no data
				Ptechetelium		1	no data		no data
			Platygloeaceae			57
				Achroomyces		34	no data		no data
				Calacogloea		1	no data		no data
				Collopezis		1	no data		no data
				Glomerogloea		1	no data		no data
				Glomopsis		2	no data		no data
				Insolibasidium		1	no data		no data
				Platygloea		17	no data		no data
		Pucciniales				8019	multicellular	Pendleton et al. (2014)
			Chaconiaceae			90
				Achrotelium		5			no data
				Aplopsora		6			no data
				Botryorhiza		1			sexual	Berndt (2012)
				Ceraceopsora		1			no data
				Chaconia		12			no data
				Goplana		12			no data
				Maravalia		42			no data
				Olivea		8			no data
				Scopella		2			no data
				Telomapea		1			no data
			Coleosporiaceae			171
				Ceropsora		1			sexual	Berndt (2012)
				Chrysomyxa		39			sexual	Berndt (2012)
				Coleosporium		127			no data
				Diaphanopellis		1			sexual	Berndt (2012)
				Gallowaya		2			no data
				Melampsoropsis		1			no data
			Cronartiaceae			82
				Cronartium		32			no data
				Endocronartium		2			no data
				Peridermium		48			no data
			Melampsoraceae			112
				Chnoopsora		2			no data
				Melampsora		110			no data
			Mikronegeriaceae			15
				Blastospora		5
					Blastospora smilacis				sexual	Ono et al. (1986)
				Chrysocelis		5			no data
				Mikronegeria		3			no data
				Stomatisora		2			sexual	Berndt (2012)
			Phakopsoraceae			246
				Aeciure		1
				Angiopsora		4			sexual	Ono et al. (1992)
				Arthuria		6			no data
				Batistopsora		1
				Bubakia		3
				Catenulopsora		2
				Cerotelium		27			sexual	Simpson et al. (2006)
				Crossopsora		16			sexual	Simpson et al. (2006)
				Dasturella		3
				Klastopsora		2
				Kweilingia		4			no data
				Macabuna		7			no data
				Monosporidium		3
				Newinia		3
				Nothoravenelia		3
				Phakopsora		109			sexual	Yepes et al. (2013)
				Phragmidiella		8			no data
				Physopella		32			asexual	Ono (2015)
				Pucciniostele		3
				Scalarispora		1
				Stakmania		1
				Uredopeltis		7			no data
			Phragmidiaceae			182
				Arthuriomyces		2			no data
				Campanulospora		1
				Frommea		2
				Frommeëlla		1
				Gerwasia		18			no data
				Gymnoconia		4			no data
				Hamaspora		15			no data
				Joerstadia		4			sexual	Berndt (2012)
				Kuehneola		22			no data
				Mainsia		2			no data
				Morispora		1
				Phragmidium		100			no data
					Phragmidium violaceum				sexual	Gomez et al.(2008)
				Physonema		1
				Scutelliformis		1
				Trachyspora		6			no data
				Xenodochus		2			no data
			Pileolariaceae			46
				Atelocauda		4			no data
				Discospora		1			no data
				Macalpinia		1			no data
				Pileolaria		16			no data
				Skierka		13			no data
				Uromycladium		11			no data
			Pucciniaceae			4413
				Allodus		8
				Argomyces		1
				Bullaria		1
				Chrysella		1
				Chrysocyclus		3
				Chrysopsora		1
				Cleptomyces		1
				Coleopucciniella		2
				Corbulopsora		3
				Coronotelium		2
				Cumminsiella		8
				Cystopsora		2
				Dicaeoma		30
				Dichlamys		1
				Endophyllum		41			sexual	Wood (2006)
				Eriosporangium		10
				Groveola		1
				Gymnosporangium		65
					Gymnosporangium asiaticum				sexual	Tetsuk & Katsuya (1984)
				Haplotelium		2
				Lysospora		1
				Micropuccinia		2
				Miyagia		3
				Nielsenia		4
				Ontotelium		1
				Polioma		6
				Poliomella		2
				Puccinella		8
				Puccinia		3192			sexual	Yepes et al. (2013)
				Ramakrishnania		1
				Roestelia		24			asexual	Lee et al. (1999)
				Rostrupia		1
				Solenodonta		4
				Stereostratum		1
				Teleutospora		2
				Trochodium		2
				Uromyces		969			sexual	Yepes et al.(2013)
				Xenostele		5
				Zaghouania		2
			Pucciniastraceae			213
				Calyptospora		1
				Hyalopsora		21			no data
				Melampsorella		4			no data
				Melampsoridium		11			no data
				Milesia		19			asexual	Ono (2015)
				Milesina		62			sexual	Berndt (2007)
				Naohidemyces		2			no data
				Peridiopsora		2			no data
				Pucciniastrum		53			no data
				Thekopsora		7			no data
				Uredinopsis		31			no data
			Pucciniosiraceae			58
				Alveolaria		2			sexual	Berndt (2012)
				Baeodromus		6			no data
				Ceratocoma		1			no data
				Chardoniella		4			sexual	Berndt (2012)
				Cionothrix		5			sexual	Berndt (2012)
				Didymopsora		6			no data
				Dietelia		13			sexual	Hernández et al. (2005)
				Endophylloides		2			no data
				Gambleola		1			no data
				Pucciniosira		17			no data
				Trichopsora		1
			Raveneliaceae			404
				Allotelium		1
				Anthomyces		3
				Anthomycetella		1
				Apra		1
				Bibulocystis		3
				Cumminsina		1
				Cystomyces		1
				Diabole		1
				Diabolidium		1
				Dicheirinia		14			no data
				Diorchidiella		2
				Diorchidium		20			no data
				Endoraecium		22			no data
				Esalque		1
				Hapalophragmium		18			no data
				Kernkampella		8			no data
				Lipocystis		1
				Nyssopsora		11			no data
				Pleoravenelia		1
				Ravenelia		242			sexual	Yepes et al. (2013)
				Reyesiella		1
				Sphaerophragmium		24			no data
				Sphenospora		6
				Spumula		7			no data
				Triphragmiopsis		3
				Triphragmium		7			no data
				Ypsilospora		3
			Sphaerophragmiaceae	Austropuccinia		1			no data
			Uncolaceae			5
				Calidion		4			no data
				Uncol		1			no data
			Uncolaceae			5
				Calidion		4			no data
				Uncol		1			no data
			Uropyxidaceae			170
				Allopuccinia		1
				Canasta		3			asexual	Carvalho & Hennen (2010)
				Dasyspora		13			sexual	Berndt (2012)
				Didymopsorella		2
				Dipyxis		2
				Gymnopuccinia		1
				Kimuromyces		1
				Leucotelium		3			no data
				Macruropyxis		1
				Mimema		1
				Ochropsora		3			no data
				Phragmopyxis		4			no data
				Poliomopsis		1
				Polythelis		1
				Porotenus		7			sexual	Berndt (2012)
				Prospodium		82			sexual	Berndt (2012)
				Sorataea		8			no data
				Tranzschelia		19			no data
				Uropyxis		17			no data
			Not assigned			1806
				Aecidiconium		1
				Aecidiolum		4
				Aecidium		829			asexual	Ono (2015)
				Caeoma		51			asexual	Ono (2015)
				Caetea		1
				Coleopuccinia		2
				Desmella		4
				Desmellopsis		1
				Desmosorus		1
				Edythea		5
				Elateraecium		3
				Flaminia		1
				Hemileia		54			sexual	Hernández et al. (2005)
				Hiratsukaia		1
				Hiratsukamyces		2
				Intrapes		1
				Mapea		1
				Masseeëlla		6
				Mehtamyces		1
				Nigredo		1
				Pelastoma		1
				Phragmotelium		5
				Puccorchidium		2
				Schroeteriaster		4
				Sphenorchidium		2
				Uraecium		11			asexual	Carvalho & Hennen (2010)
				Uredo		811			asexual	Yepes et al.(2013)
		Septobasidiales	Septobasidiaceae			244	multicellular	Weber (2009)
				Aphelariopsis		1			no data
				Auriculoscypha		1			no data
				Coccidiodictyon		1			no data
				Glenospora		10			no data
				Johncouchia		1			no data
				Mohortia		2			no data
				Ordonia		1			no data
				Septobasidium		225			no data
				Uredinella		2			no data
	Tremellomycetes					593	multicellular	Millanes et al. (2011)
		Cystofilobasidiales				28
			Cystofilobasidiaceae			11
				Cystofilobasidium		7			sexual	Deák & Péter (2013)
				Itersonilia		3			asexual	Deák & Péter (2013)
				Xanthophyllomyces		1			sexual	Deák & Péter (2013)
			Mrakiaceae			17
				Krasilnikovozyma		2			no data
				Mrakia		9			sexual	Deák & Péter (2013)
				Tausonia		2			asexual	Boekhout et al. (2011)
				Udeniomyces		4			asexual	Deák & Péter (2013)
		Filobasidiales				27
			Filobasidiaceae			12
				Filobasidium		6			sexual	Deák & Péter (2013)
				Goffeauzyma		6			no data
			Piskurozymaceae			15
				Piskurozyma		9			no data
				Solicoccozyma		6			no data
		Holtermanniales	Holtermanniaceae			11
				Holtermannia		6			sexual	Deák & Péter (2013)
				Holtermanniella		5			no data
		Moniliellales	Moniliellaceae	Moniliella		11			asexual	Wang et al. (2015a)
		Tremellales				435
			Bulleraceae			19
				Bullera		8			asexual	Sampaio et al. (2004)
				Fonsecazyma		3			no data
				Genolevuria		4			no data
				Pseudotremella		4			no data
			Bulleribasidiaceae			24
				Bulleribasidium		11			sexual	Deák & Péter (2013)
				Nielozyma		2			no data
				Vishniacozyma		11			no data
			Carcinomycetaceae			18
				Carcinomyces		3			no data
				Heterocephalacria		4			no data
				Syzygospora		11			no data
			Cuniculitremaceae			19
				Cuniculitrema		1			sexual	Boekhout et al. (2011)
				Fellomyces		4			asexual	Deák & Péter (2013)
				Kockovaella		14			asexual	Deák & Péter (2013)
			Hyaloriaceae			12
				Helicomyxa		1			no data
				Hyaloria		3			no data
				Myxarium		8			no data
			Naemateliaceae			3
				Dimennazyma		1			no data
				Naematelia		2			no data
			Phaeotremellaceae	Gelidatrema		1			no data
			Phragmoxenidiaceae			7
				Phragmoxenidium		1			no data
				Phyllogloea		6			no data
			Rhynchogastremataceae	Rhynchogastrema		9			no data
			Sirobasidiaceae			11
				Fibulobasidium		3			sexual	Deák & Péter (2013)
				Sirobasidium		8			sexual	Deák & Péter (2013)
			Tetragoniomycetaceae			2
				Bandonia		1			no data
				Tetragoniomyces		1			sexual	Pontes et al. (2017)
			Tremellaceae			263
				Biatoropsis		4			no data
				Bulleromyces		1
				Cryptococcus		36			asexual	Deák & Péter (2013)
				Dictyotremella		1
				Dioszegia		12			asexual	Deák & Péter (2013)
				Epidochium		1
				Filobasidiella		1
				Hormomyces		2
				Naganishia		14			no data
				Neotremella		1
				Papiliotrema		23			sexual	Valente et al. (2012)
				Phaeotremella		7			no data
				Sirotrema		3			no data
				Tremella		154			sexual	Deák & Péter (2013)
				Trimorphomyces		2			sexual	Deák & Péter (2013)
				Tsuchiyaea		1
			Trimorphomycetaceae			6
				Carlosrosaea		1			no data
				Saitozyma		4			no data
				Sugitazyma		1			no data
			Not assigned			41
				Derxomyces		21			asexual	Valente et al. (2012)
				Hannaella		6			asexual	Boekhout et al. (2011)
				Kwoniella		10			sexual	Valente et al. (2012)
				Sigmogloea		1			no data
				Tremellina		1			asexual	Kirschner et al. (2001)
				Xenolachne		2			no data
		Trichosporonales				78
			Trichosporonaceae			77
				Apiotrichum		23			asexual	James et al. (2016)
				Cryptotrichosporon		2			asexual	Deák & Péter (2013)
				Cutaneotrichosporon		15			unknown	Bracharz (2017)
				Effuseotrichosporon		1			no data
				Haglerozyma		1			no data
				Hyalodendron		2			asexual	Przybyl & De Hoog (1989)
				Phyllopta		1			no data
				Trichosporon		28			asexual	Boekhout et al. (2011)
				Vanrija		4			no data
			Not assigned	Takashimella		1			no data
		Not assigned	Not assigned			3
				Heteromycophaga		2			no data
				Trichosporonoides		1			no data
	Tritirachiomycetes	Tritirachiales	Tritirachiaceae			16
				Paratritirachium		2	no data		no data
				Tritirachium		14	no data		no data
	Ustilaginomycetes					1405	multicellular	Begerow et al. (2006)
		Uleiellales	Uleiellaceae	Uleiella		2			no data
		Urocystidales				313
			Doassansiopsidaceae	Doassansiopsis		15			no data
			Fereydouniaceae	Fereydounia	Fereydounia khargensis	1			asexual	Nasr et al. (2014)
			Floromycetaceae			13
				Antherospora		12			no data
				Floromyces		1			no data
			Glomosporiaceae			78
				Glomosporium		2			no data
				Poikilosporium		1			no data
				Sorosporium		13			no data
				Thecaphora		62			no data
			Mycosyringaceae	Mycosyrinx		3			no data
			Urocystidaceae			203
				Flamingomyces		1			no data
				Melanoxa		2			no data
				Melanustilospora		2			no data
				Mundkurella		6			no data
				Tuburcinia		2			no data
				Urocystis		185			no data
				Ustacystis		2			no data
				Vankya		3			no data
		Ustilaginales				1088	multicellular	Spanu (2012)
			Anthracoideaceae			232
				Anthracoidea		118
					Anthracoidea aspera				sexual	Kokkonen & Raudaskoski (1964)
					Anthracoidea limosa				sexual	Kokkonen & Raudaskoski (1964)
				Crotalia		5			no data
				Farysporium		1
				Heterotolyposporium		2
				Kuntzeomyces		2
				Leucocintractia		6			no data
				Moreaua		39			no data
				Orphanomyces		3			no data
				Pilocintractia		2
				Planetella		1
				Portalia		1
				Schizonella		8			no data
				Stegocintractia		6			no data
				Testicularia		3			no data
				Tolyposporium		8			no data
				Trichocintractia		1
				Ustanciosporium		26			no data
			Cintractiaceae	Cintractia		28			sexual	Golubev (2007)
			Cintractiellaceae	Cintractiella		2			no data
			Clintamraceae	Clintamra		1			sexual	Piątek et al. (2017)
			Dermatosoraceae	Dermatosorus		7			no data
			Farysiaceae	Farysia		27			no data
			Geminaginaceae	Geminago		1			no data
			Melanopsichiaceae	Melanopsichium		6			no data
			Melanotaeniaceae			25
				Exoteliospora		1			no data
				Melanotaenium		20			no data
				Yelsemia		4			no data
			Pericladiaceae	Pericladium		3			no data
			Ustilaginaceae			732
				Ahmadiago		1
				Aizoago		2
				Anomalomyces		2
				Anthracocystis		134			no data
				Bambusiomyces		1
				Centrolepidosporium		1
				Dirkmeia		1
				Eriocaulago		2
				Eriomoeszia		1
				Eriosporium		2
				Franzpetrakia		3
				Kalmanozyma		3
				Langdonia		9			no data
				Macalpinomyces		48			no data
				Moesziomyces		6			sexual	Golubev (2007)
				Mycosarcoma		4
				Parvulago		1
				Pattersoniomyces		1
				Pseudozyma		5			asexual	Deák & Péter (2013)
				Shivasia		1
				Sporisorium		228			sexual	Golubev (2007)
				Stollia		5			no data
				Tranzscheliella		25			no data
				Triodiomyces		5			no data
				Ustilago		240			sexual	Golubev (2007)
				Yunchangia		1
			Websdaneaceae			22
				Restiosporium		21			no data
				Websdanea		1			no data
			Not assigned	Endothlaspis		2			no data
		Violaceomycetales	Violaceomycetaceae	Violaceomyces		1			no data
		Not assigned	Not assigned	Eriocortex		1			no data
	Wallemiomycetes					10
		Wallemiales	Wallemiaceae			9
				Bargellinia		2	no data		no data
				Wallemia		7	no data
					Wallemia sebi				asexual	Abraham (2001)
		Not assigned	Not assigned	Chernovia		1	no data		no data
	Not assigned	Not assigned				38
			Bartheletiaceae	Bartheletia		1	no data		no data
			Not assigned			37
				Anastomyces		1	no data		no data
				Anguillomyces		1	no data		no data
				Anthoseptobasidium		3	no data		no data
				Arcispora		1	no data		no data
				Arrasia		1	no data		no data
				Brevicellopsis		1	no data		no data
				Celatogloea		1
				Cleistocybe		4	no data		no data
				Cystogloea		1
				Dacryomycetopsis		1
				Eriocybe		1
				Frantisekia		1
				Hallenbergia		1
				Hirticlavula		1
				Hymenoporus		1
				Kryptastrina		1
				Microstella		1
				Neotyphula		1
				Nodulospora		1
				Paraphelaria		2	no data		no data
				Punctulariopsis		4	no data		no data
				Radulodontia		1
				Restilago		1
				Sinofavus		1
				Zanchia		1
				Zygodesmus		2	no data		no data
				Zygogloea		1

## Sheet: sexual proportion for Zygomycot
phylum	class	order	family	genus	species		number of sexual species	number of asexual species
Zygomycota					1366
(Catalogue of life-20190119)	Entomophthoromycetes				326
		Entomophthorales
			Ancylistaceae		60		60*(36/54)=40	20
				Ancylistes	4		0
				Conidiobolus	54		54*(4/6)=36	18
				Macrobiotophthora	2		0
			Completoriaceae	Completoria	1		0
			Entomophthoraceae		241		241
			Meristacraceae	Meristacrum	2		0
			Neozygitaceae		21			21
			Not assigned	Zygaenobia	1		0
	Mortierellomycetes	Mortierellales	Mortierellaceae		122			122
	Mucoromycetes				287		287
		Mucorales
			Backusellaceae	Backusella	13
			Choanephoraceae		6
			Cunninghamellaceae		51
			Lentamycetaceae		6
			Lichtheimiaceae		19
			Mucoraceae		115
			Mycocladaceae	Mycocladus	1
			Mycotyphaceae		6
			Phycomycetaceae		8
			Pilobolaceae		9
			Radiomycetaceae	Radiomyces	3
			Rhizopodaceae	Rhizopus	12
			Saksenaeaceae		10
			Syncephalastraceae		23
			Not assigned		5
	Zoopagomycetes				258
		Kickxellales
			Kickxellaceae		37			37
		Zoopagales			221
			Cochlonemataceae		35		35
			Helicocephalidaceae		23			23
			Piptocephalidaceae		87		87
			Sigmoideomycetaceae		3			3
			Zoopagaceae		71		71*(30/59)=36	35
				Acaulopage	27			27
				Cystopage	9		9
				Lecophagus	2			2
				Stylopage	17		17
				Tentaculophagus	1		0
				Zoopage	11		0
				Zoophagus	4		4
			Not assigned		2			2
	Not assigned				373
		Asellariales	Asellariaceae		14			14
		Basidiobolales	Basidiobolaceae		5		5
		Dimargaritales			14			14
			Dimargaritaceae		13
			Not assigned	Spinalia	1
		Endogonales	Endogonaceae		36			36
		Harpellales			271			271
			Harpellaceae		56
			Legeriomycetaceae		205
			Not assigned		10		0
		Umbelopsidales	Umbelopsidaceae	Umbelopsis	15			15
		Not assigned	Not assigned		18			18
						total	731	631
						sexual proportion=731/(803+549)=731/1362=

## Sheet: Blastocladiomycota
Phylum	Class	Order	Family	Genus	Species	Species richness	Sexual/asexual	Reference for reproduction
Blastocladiomycota						56
	Blastocladiomycetes					43
		Blastocladiales				43
			Blastocladiaceae			27
				Allomyces		6
					Allomyces arbusculus		sexual	Wolf (1939)
					Allomyces javanicus		sexual	Wolf (1939)
					Allomyces macrogynus		sexual	Porter & Jaworski (1966)
					Allomyces moniliformis		no data
					Allomyces neomoniliformis		no data
					Allomyces reticulatus		no data
				Blastocladia		3	unknown	Cantino (1949)
				Blastocladiella		3
					Blastocladiella anabaenae		no data
					Blastocladiella britannica		no data
					Blastocladiella emersonii		asexual	Gleason et al. (2010)
				Blastocladiopsis		2	no data
				Clavochytridium		12	no data
				Microallomyces		1	no data
			Catenariaceae			7
				Catenaria		2
					Catenaria anguillulae		asexual	Gleason et al. (2010)
				Catenomyces		1	no data
				Nematoceromyces		3	no data
				Polycaryum		1	no data
			Coelomomycetaceae	Coelomomyces		8	sexual	Federici (1980)
			Sorochytriaceae	Sorochytrium		1	no data
	Physodermatomycetes	Physodermatales				12
			Physodermataceae			12
				Paraphysoderma	Paraphysoderma sedebokerense	1	sexual	Karpov et al. (2018)
				Physoderma		10	no data
				Urophlyctis		1	no data

[truncated: 11 more sheets:  Chytridiomycota, Microsporidia, Mucoromycota , Zygomycota, Rhodophyta, Haptophytes, Bacillariophyta, Ciliophora, Dinophyta, Rhizaria  , Oomycota]
